# Supplementary material for: Trifluoromethyl nitrones: from fluoral to optically active hydroxylamines
Source: Royal Society of Chemistry journal article supplement (doi:10.1039/c001791d), 2010-01-01

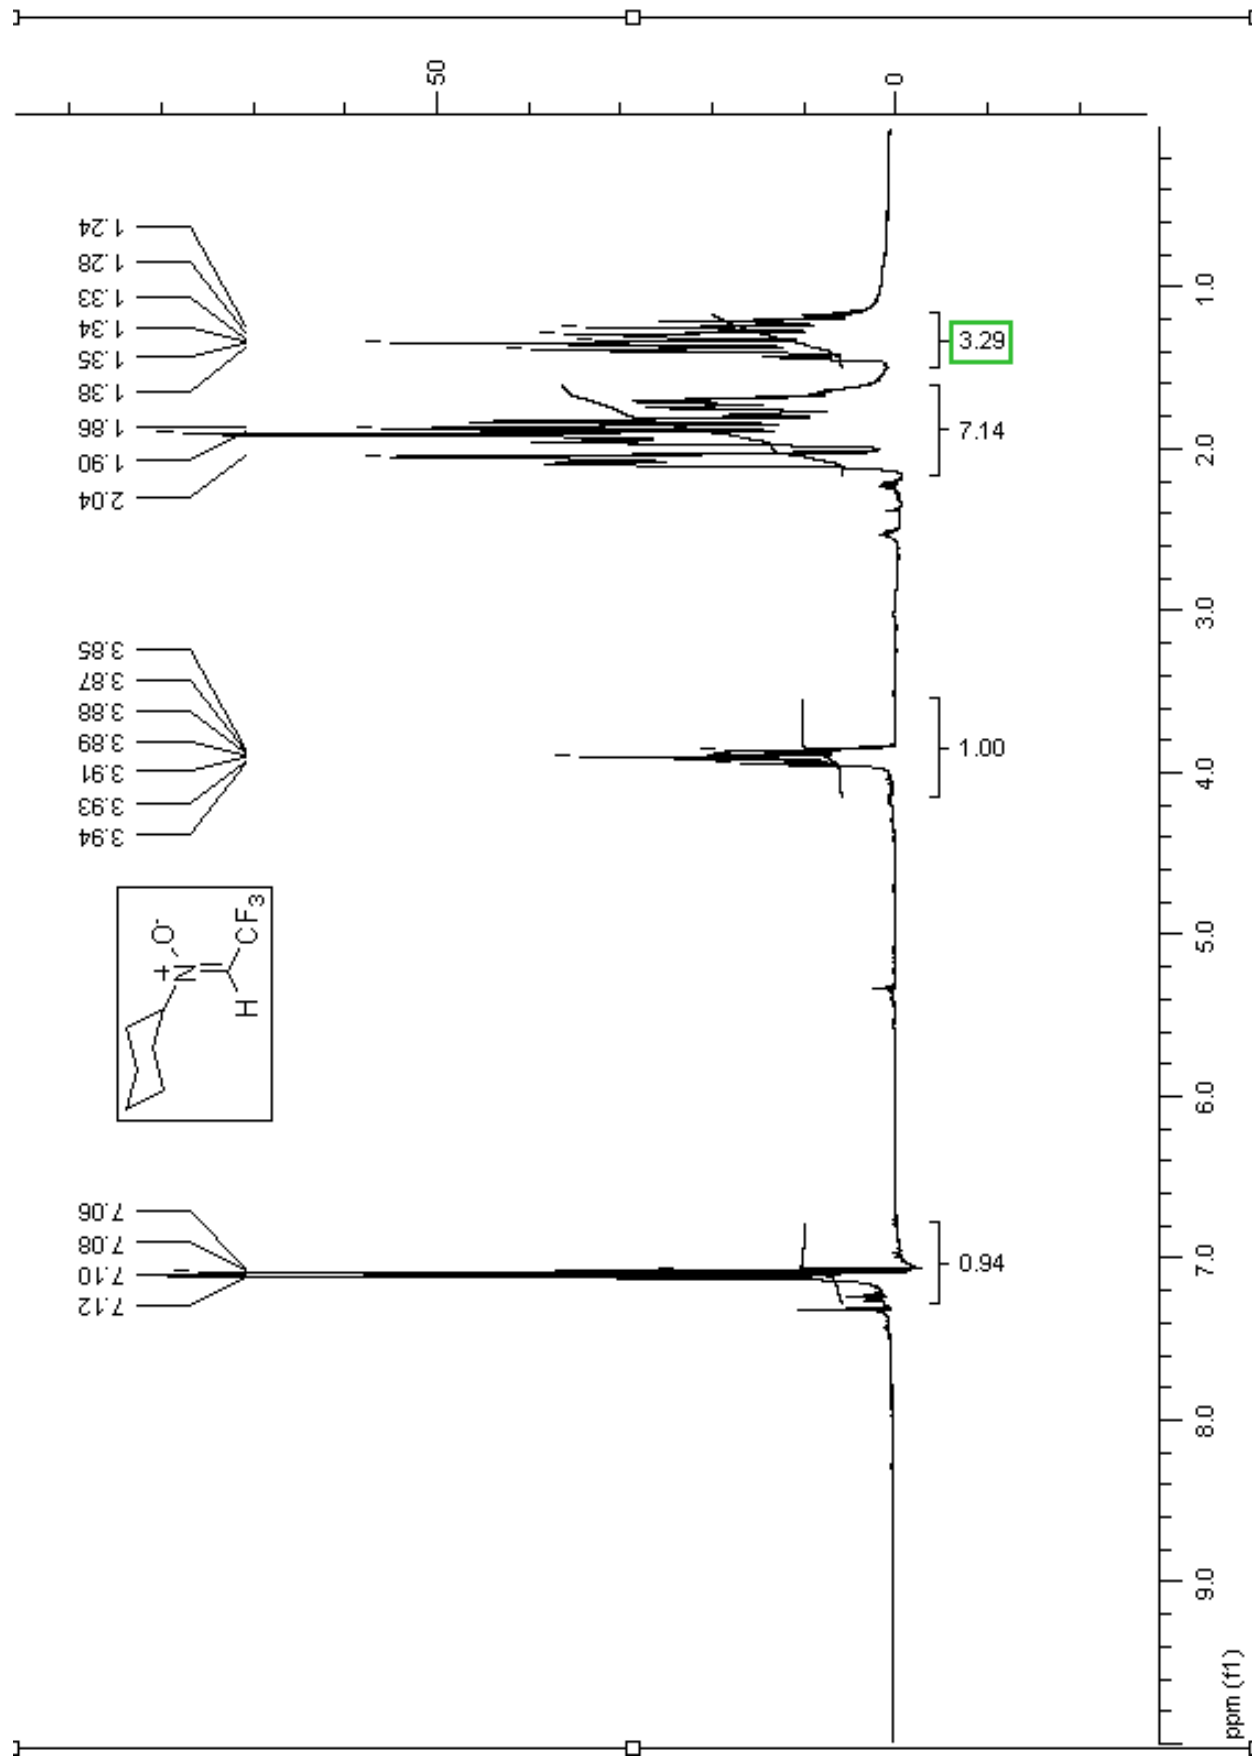

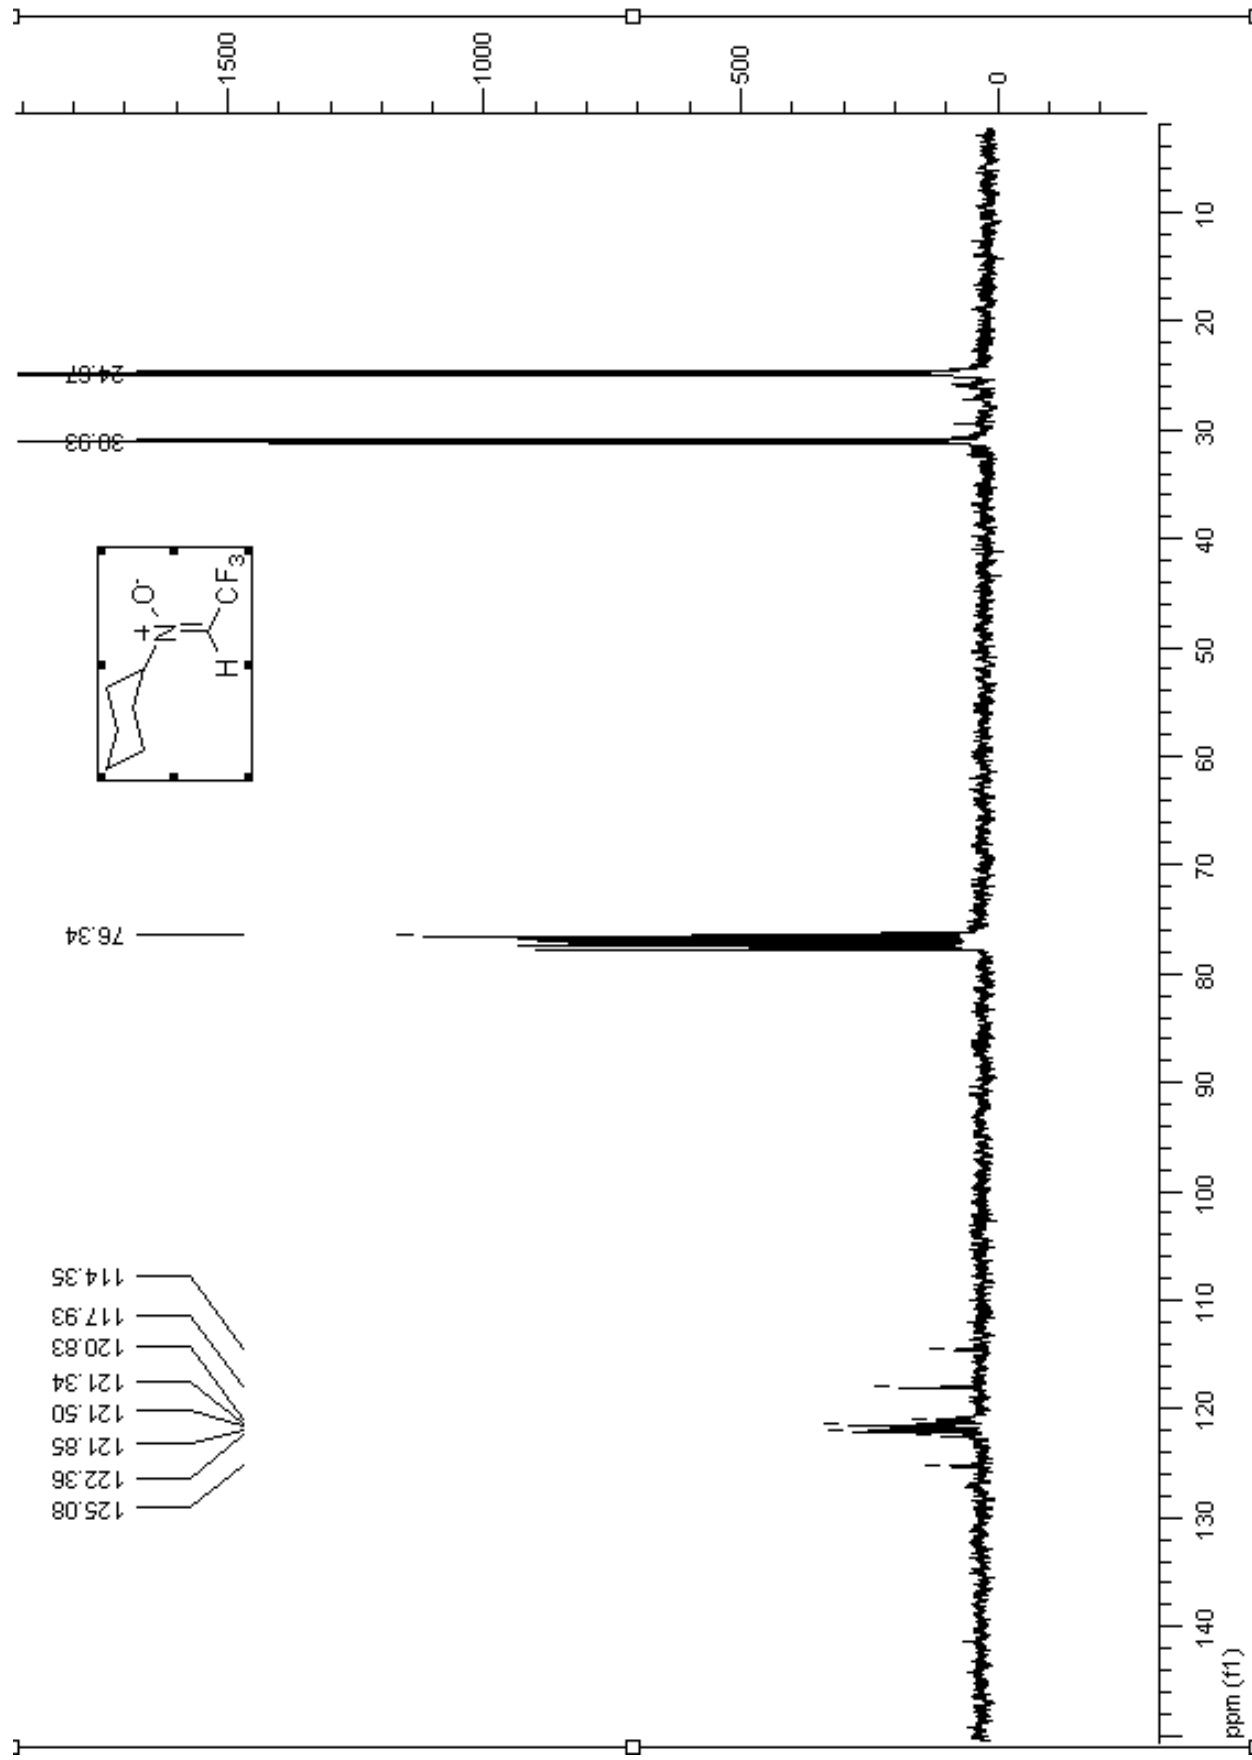

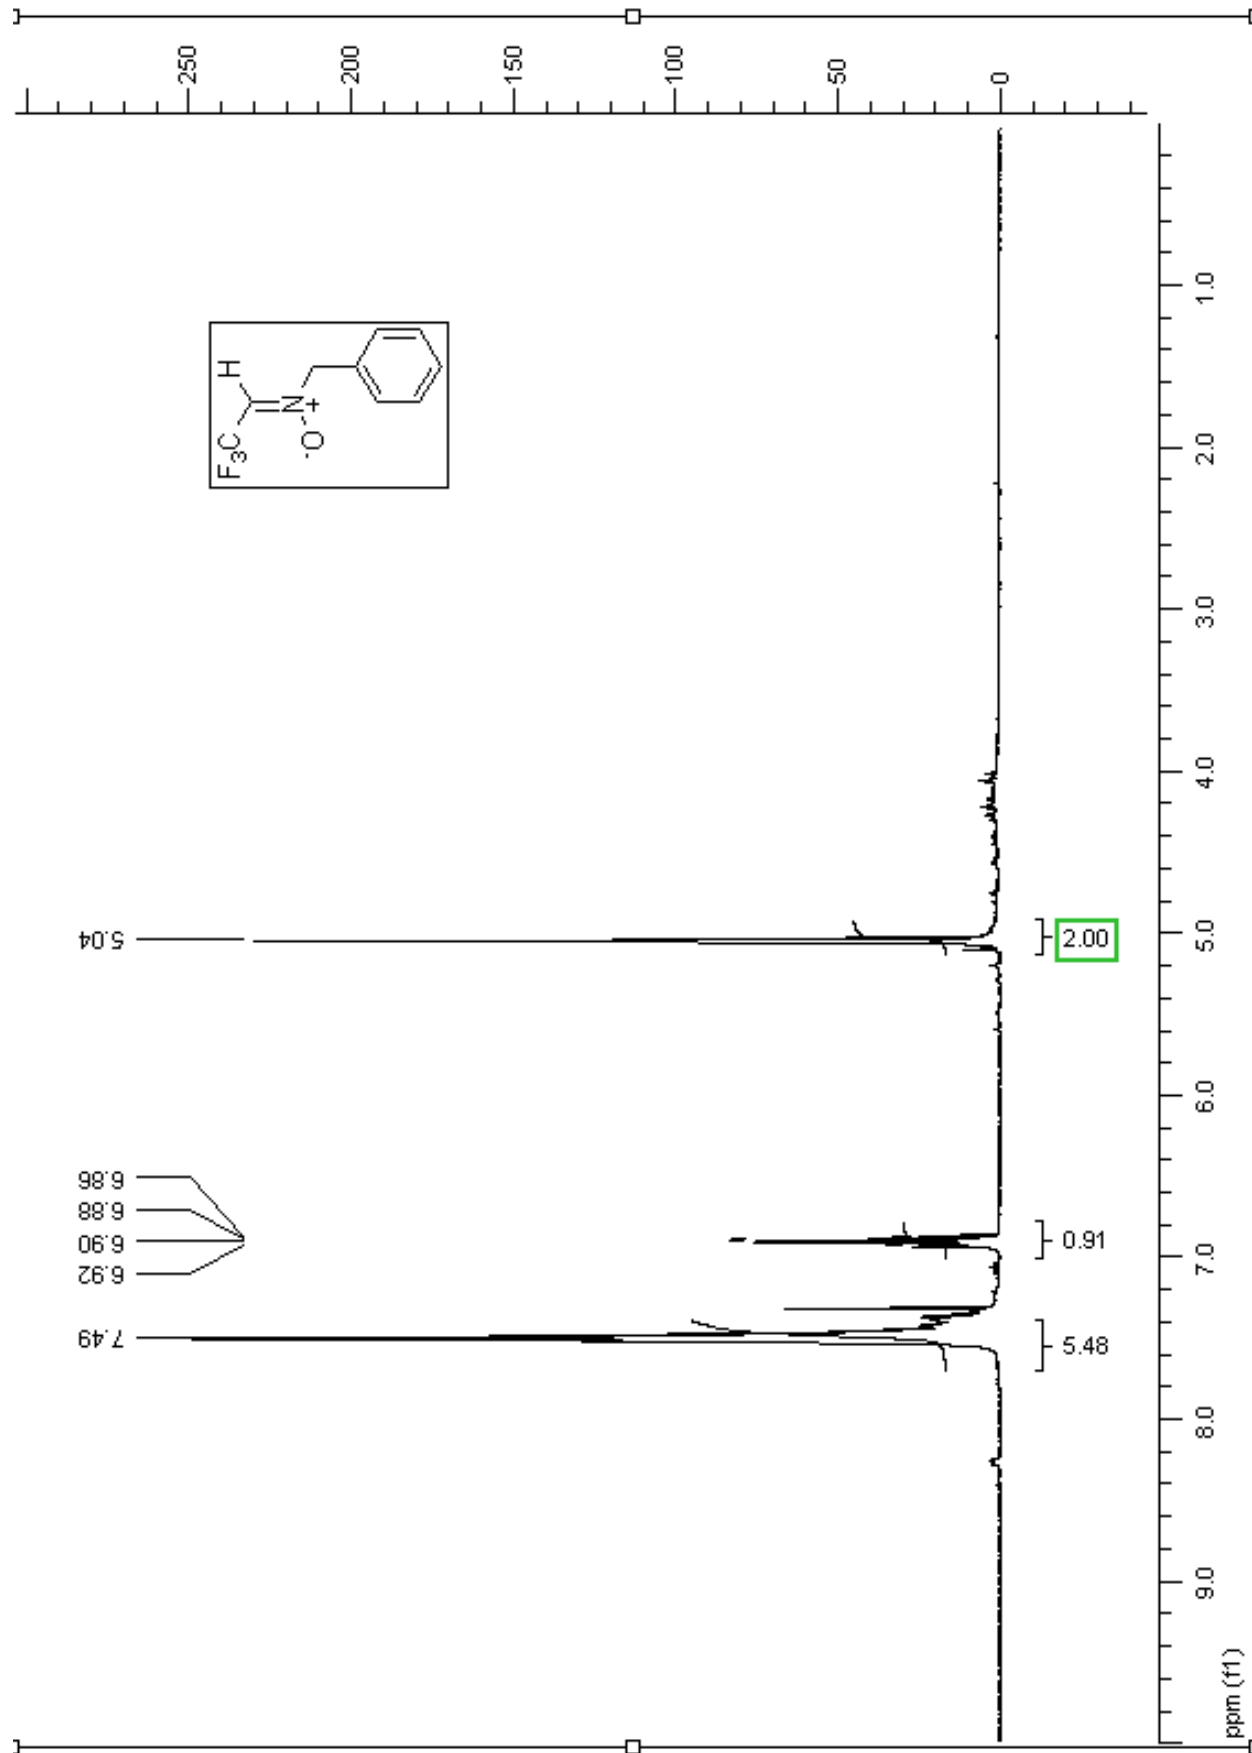

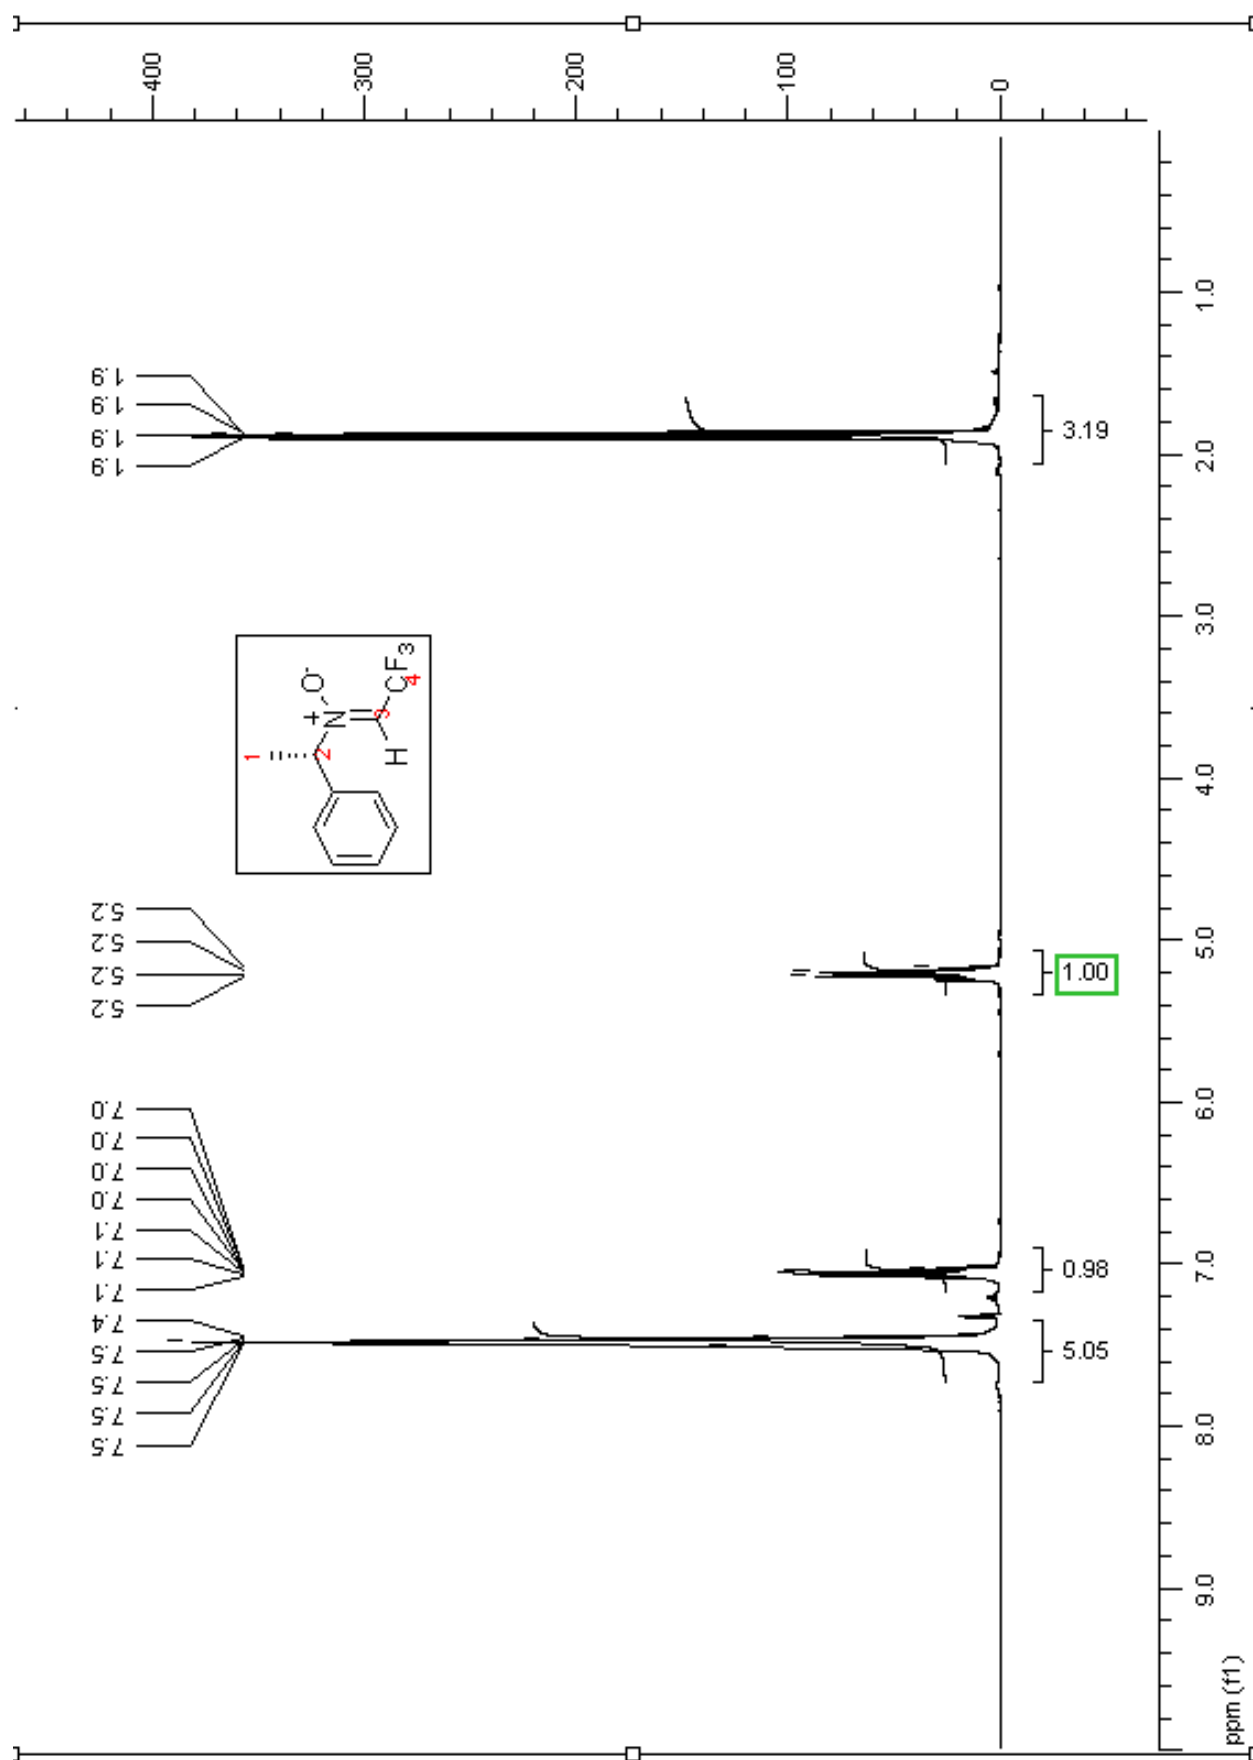

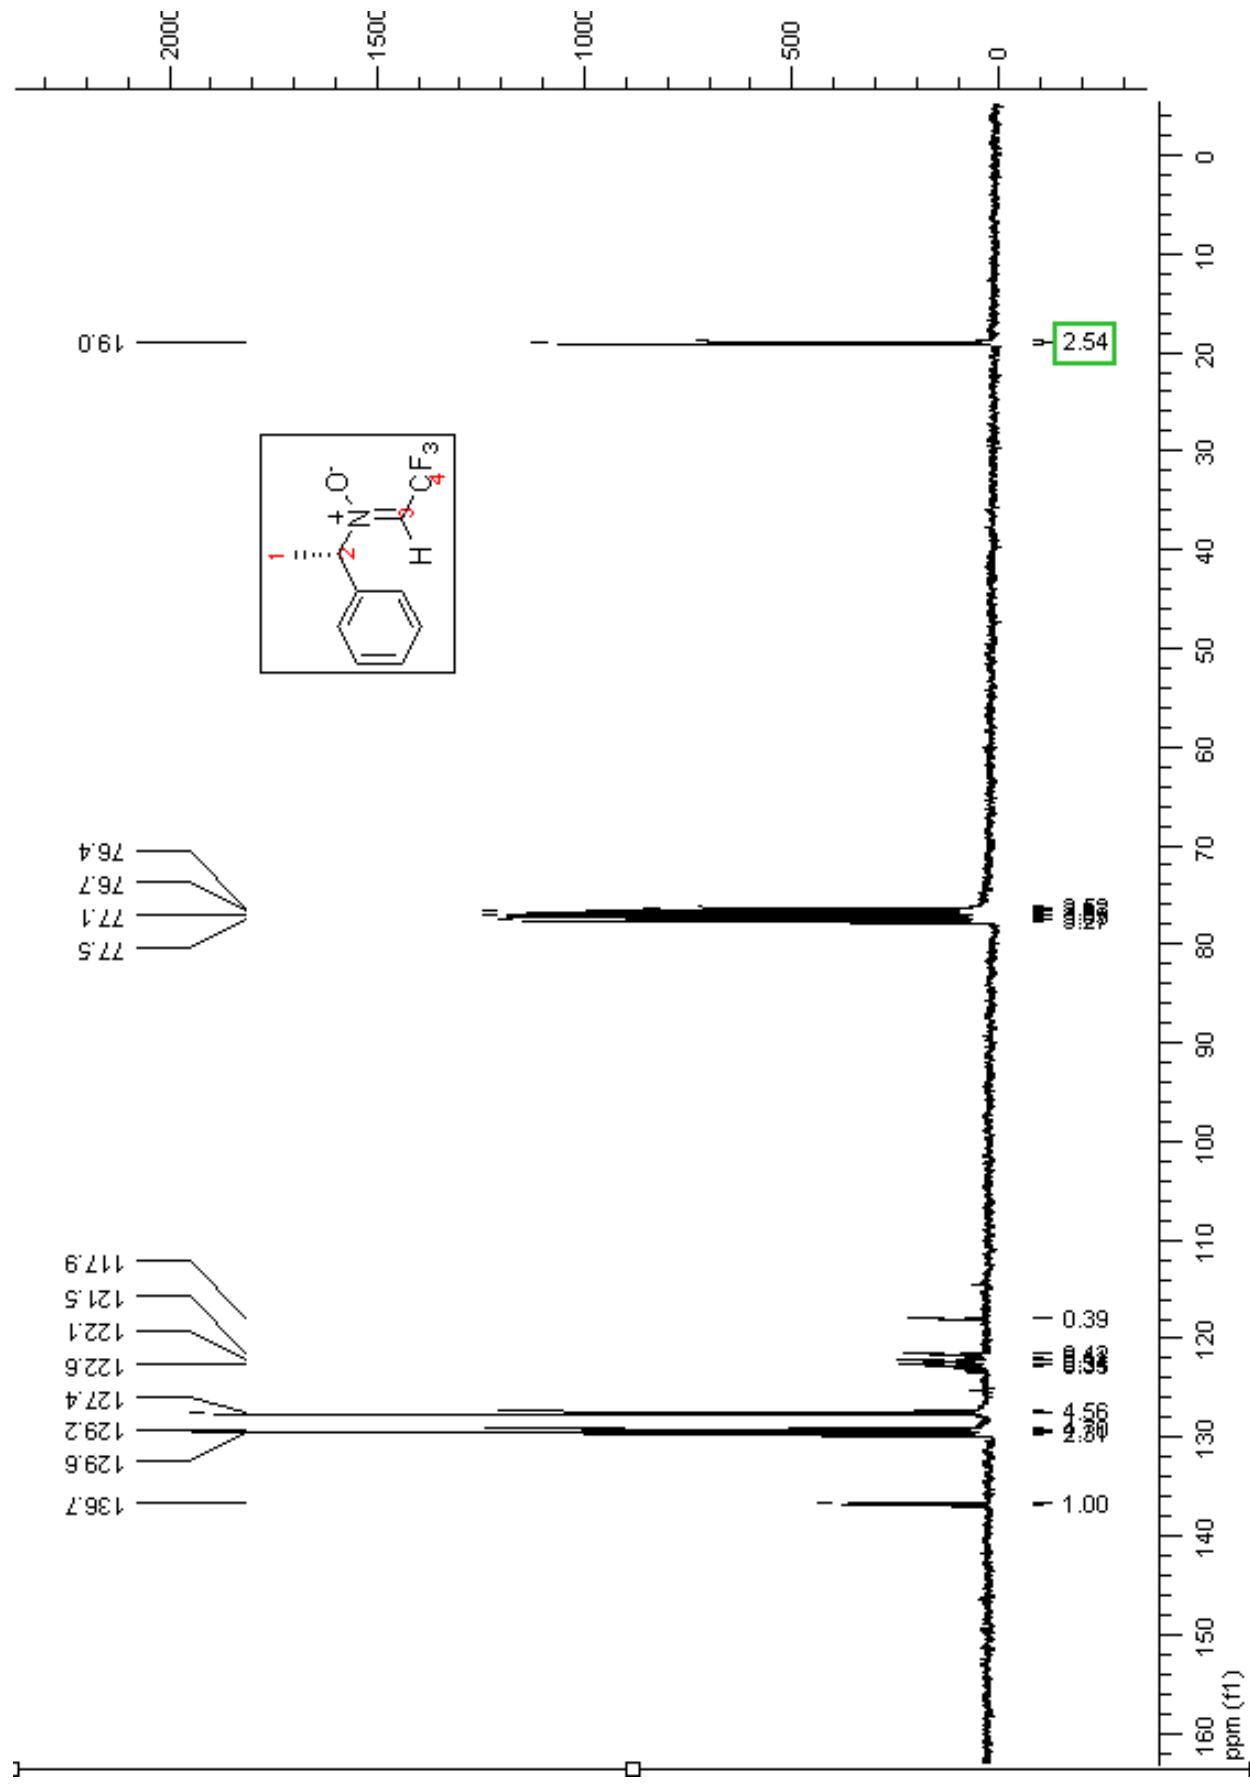

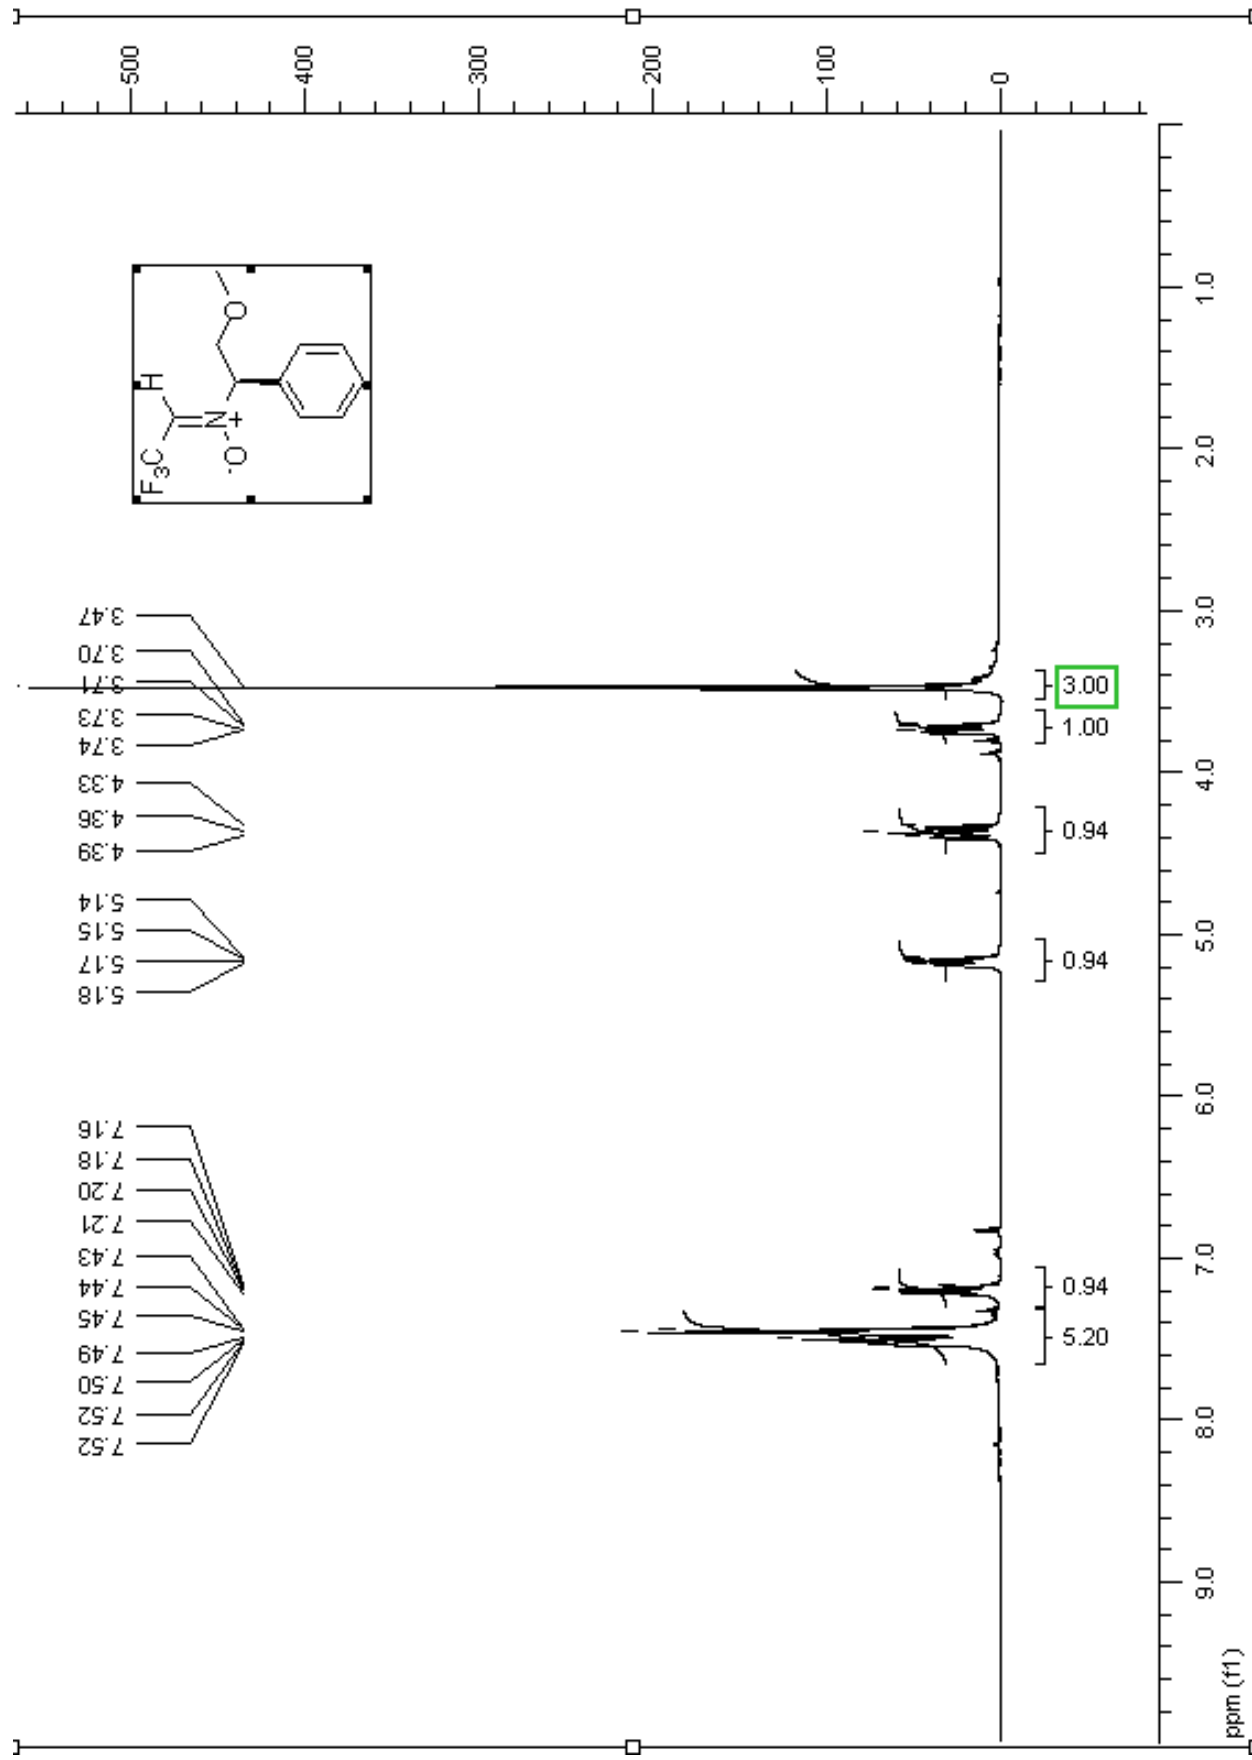

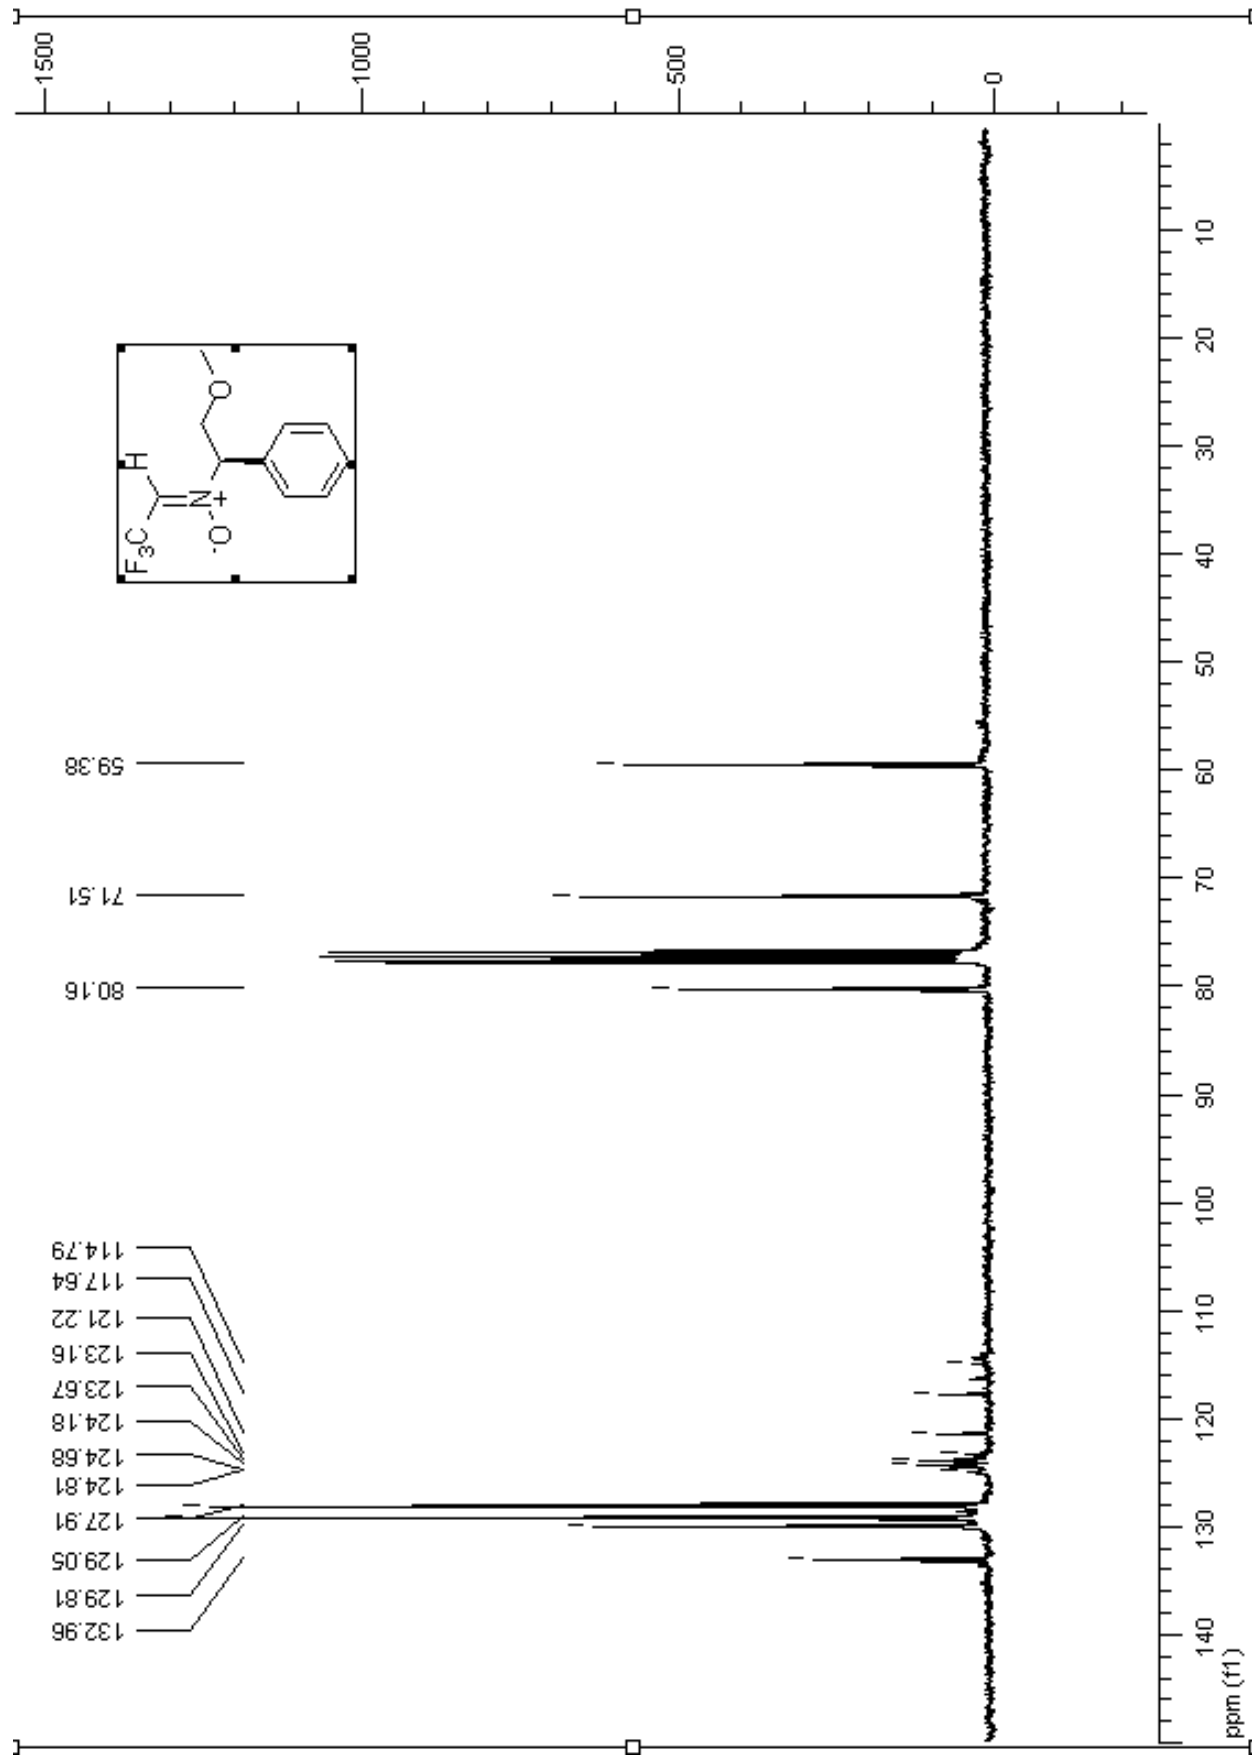

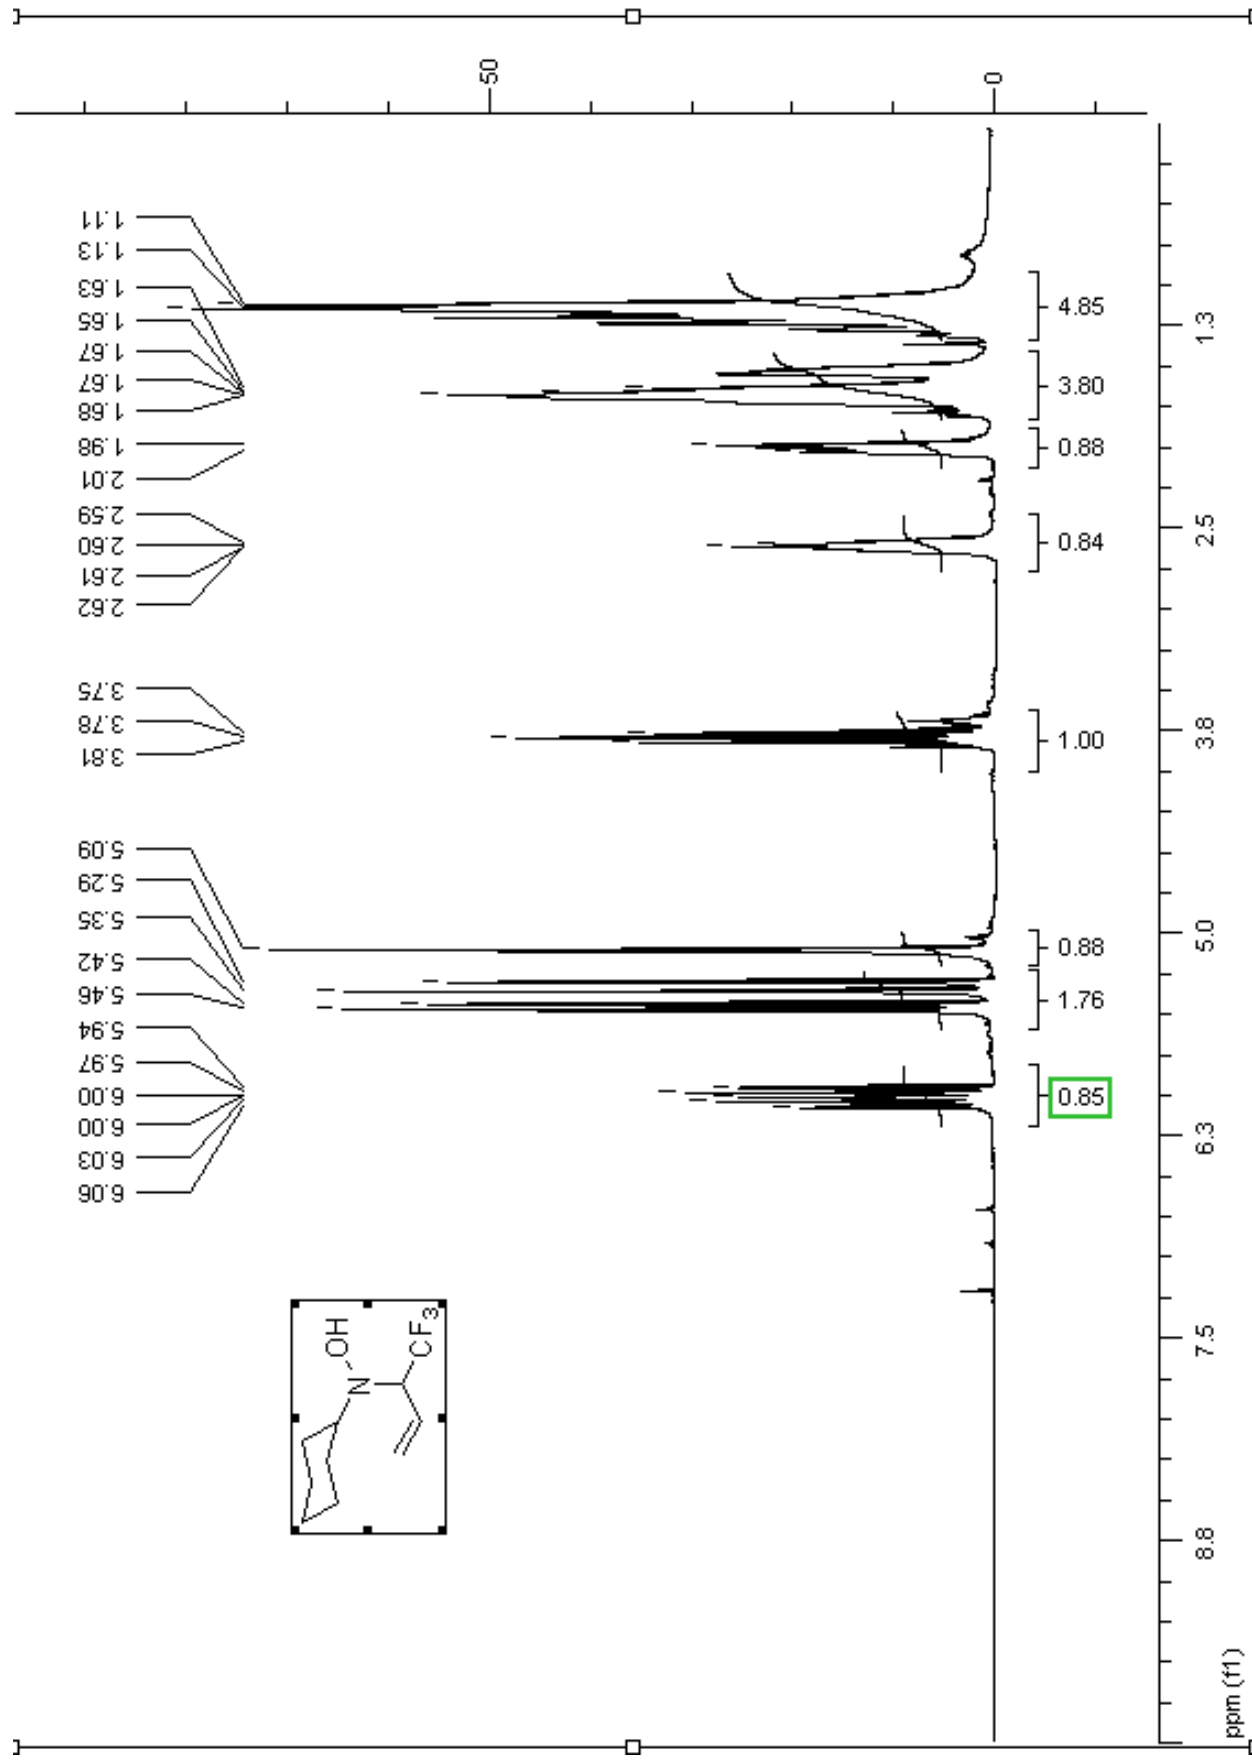



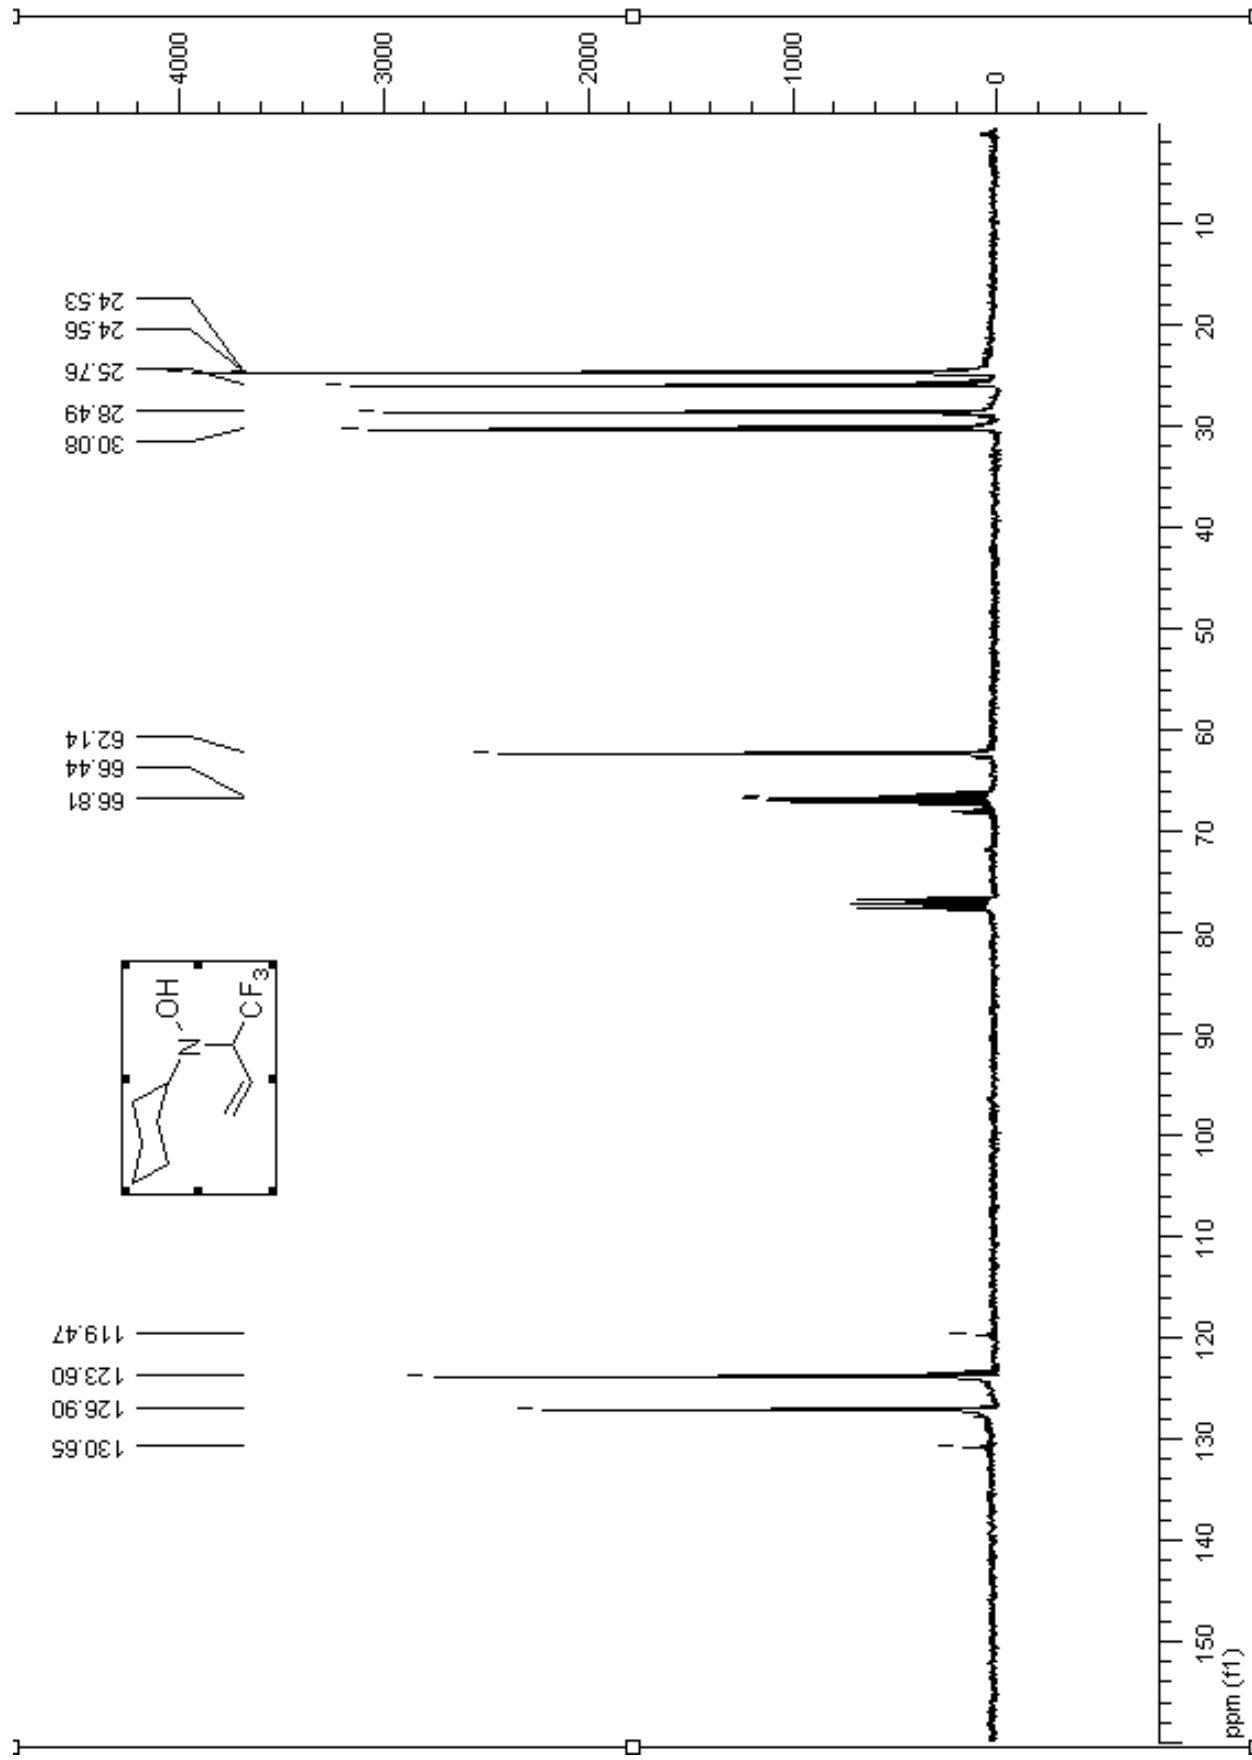

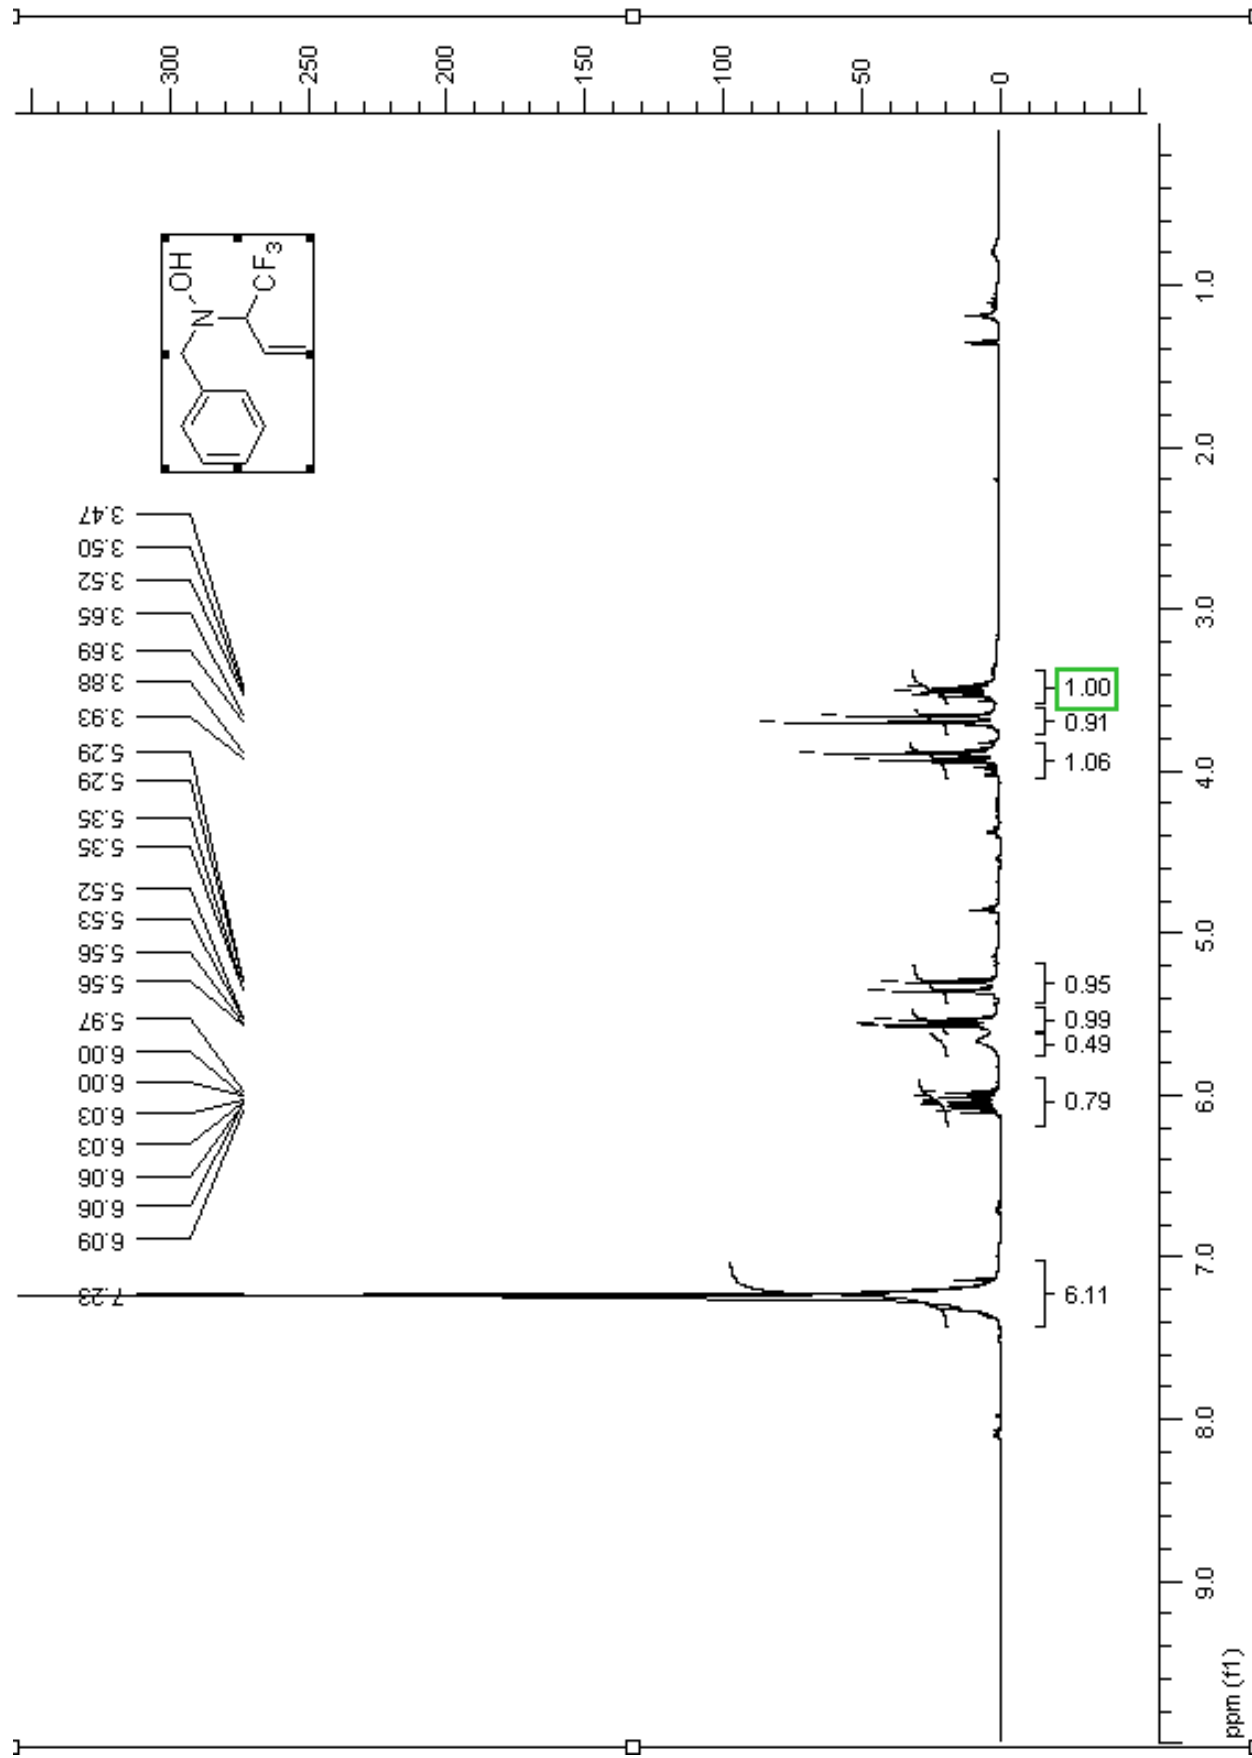

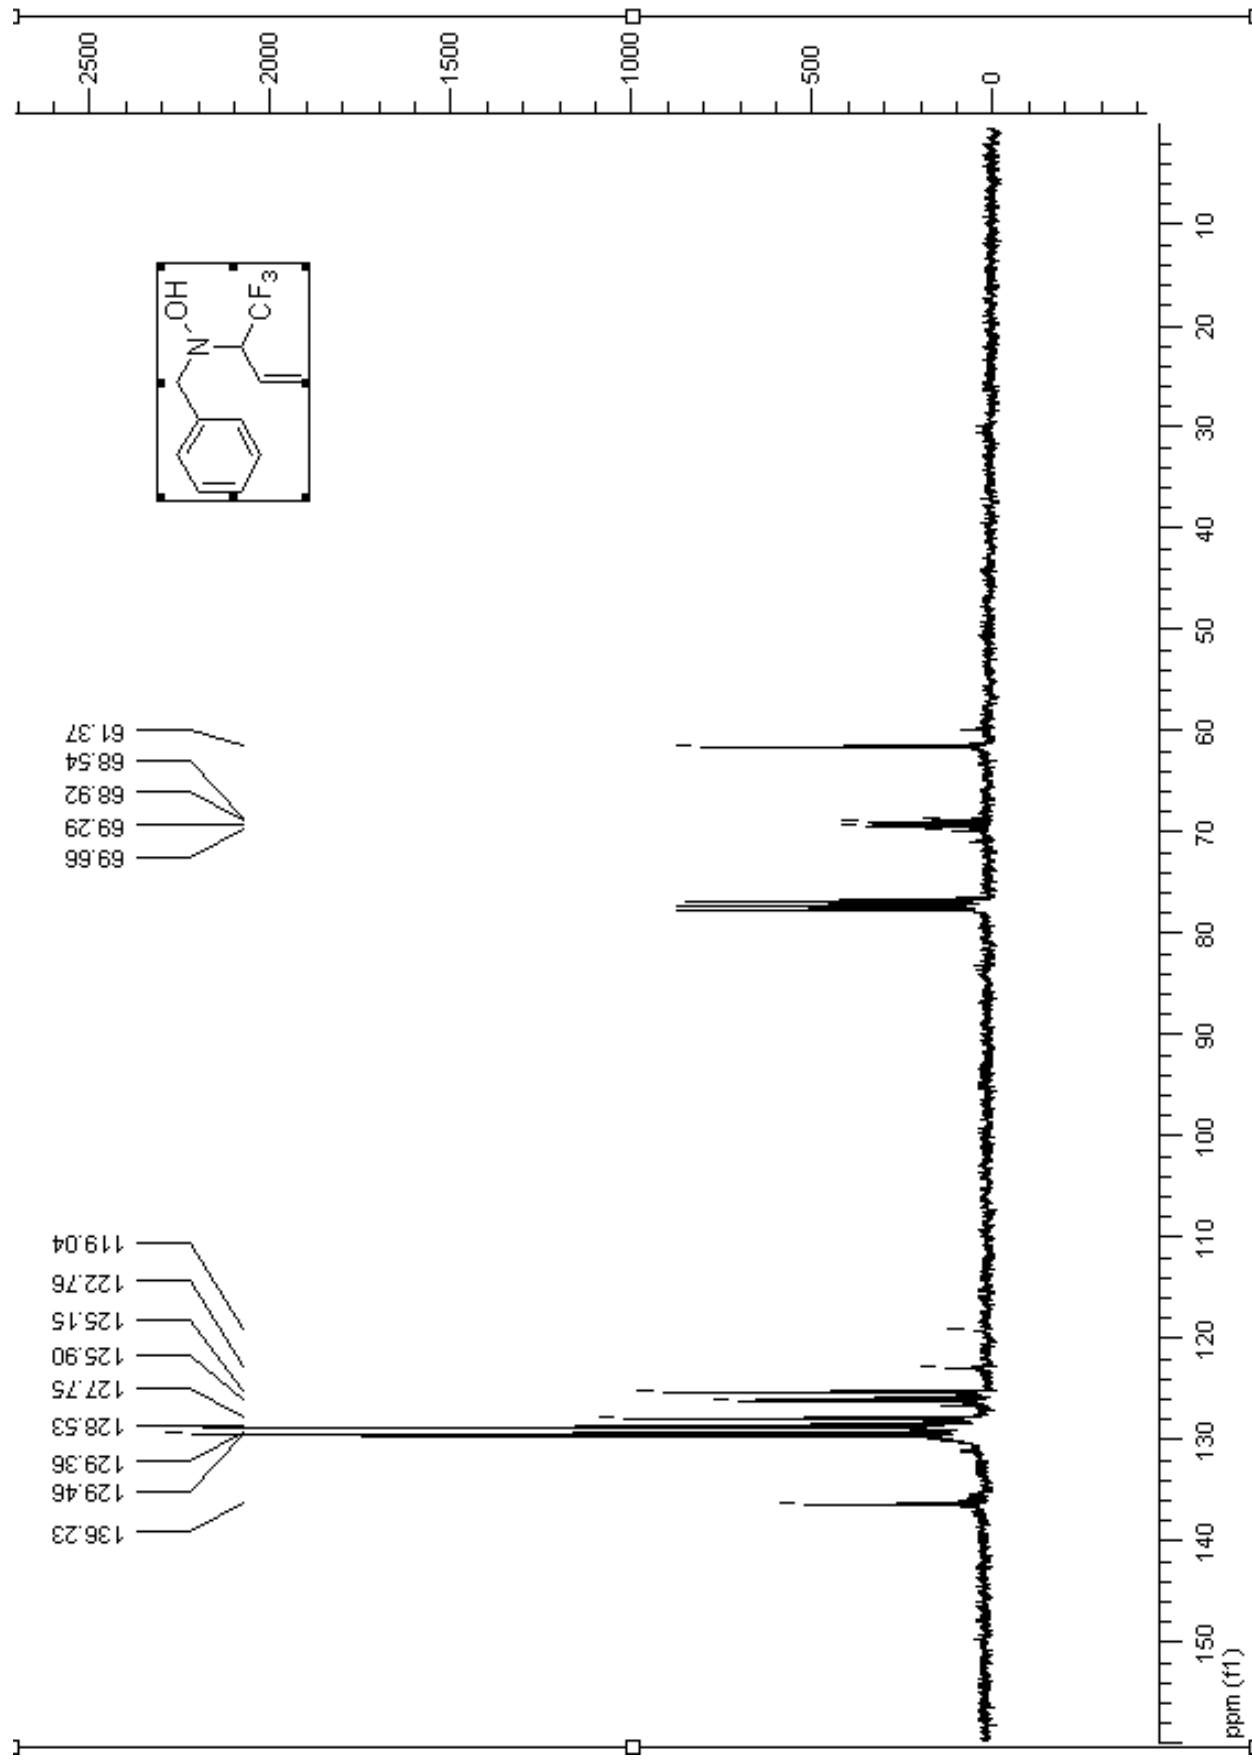

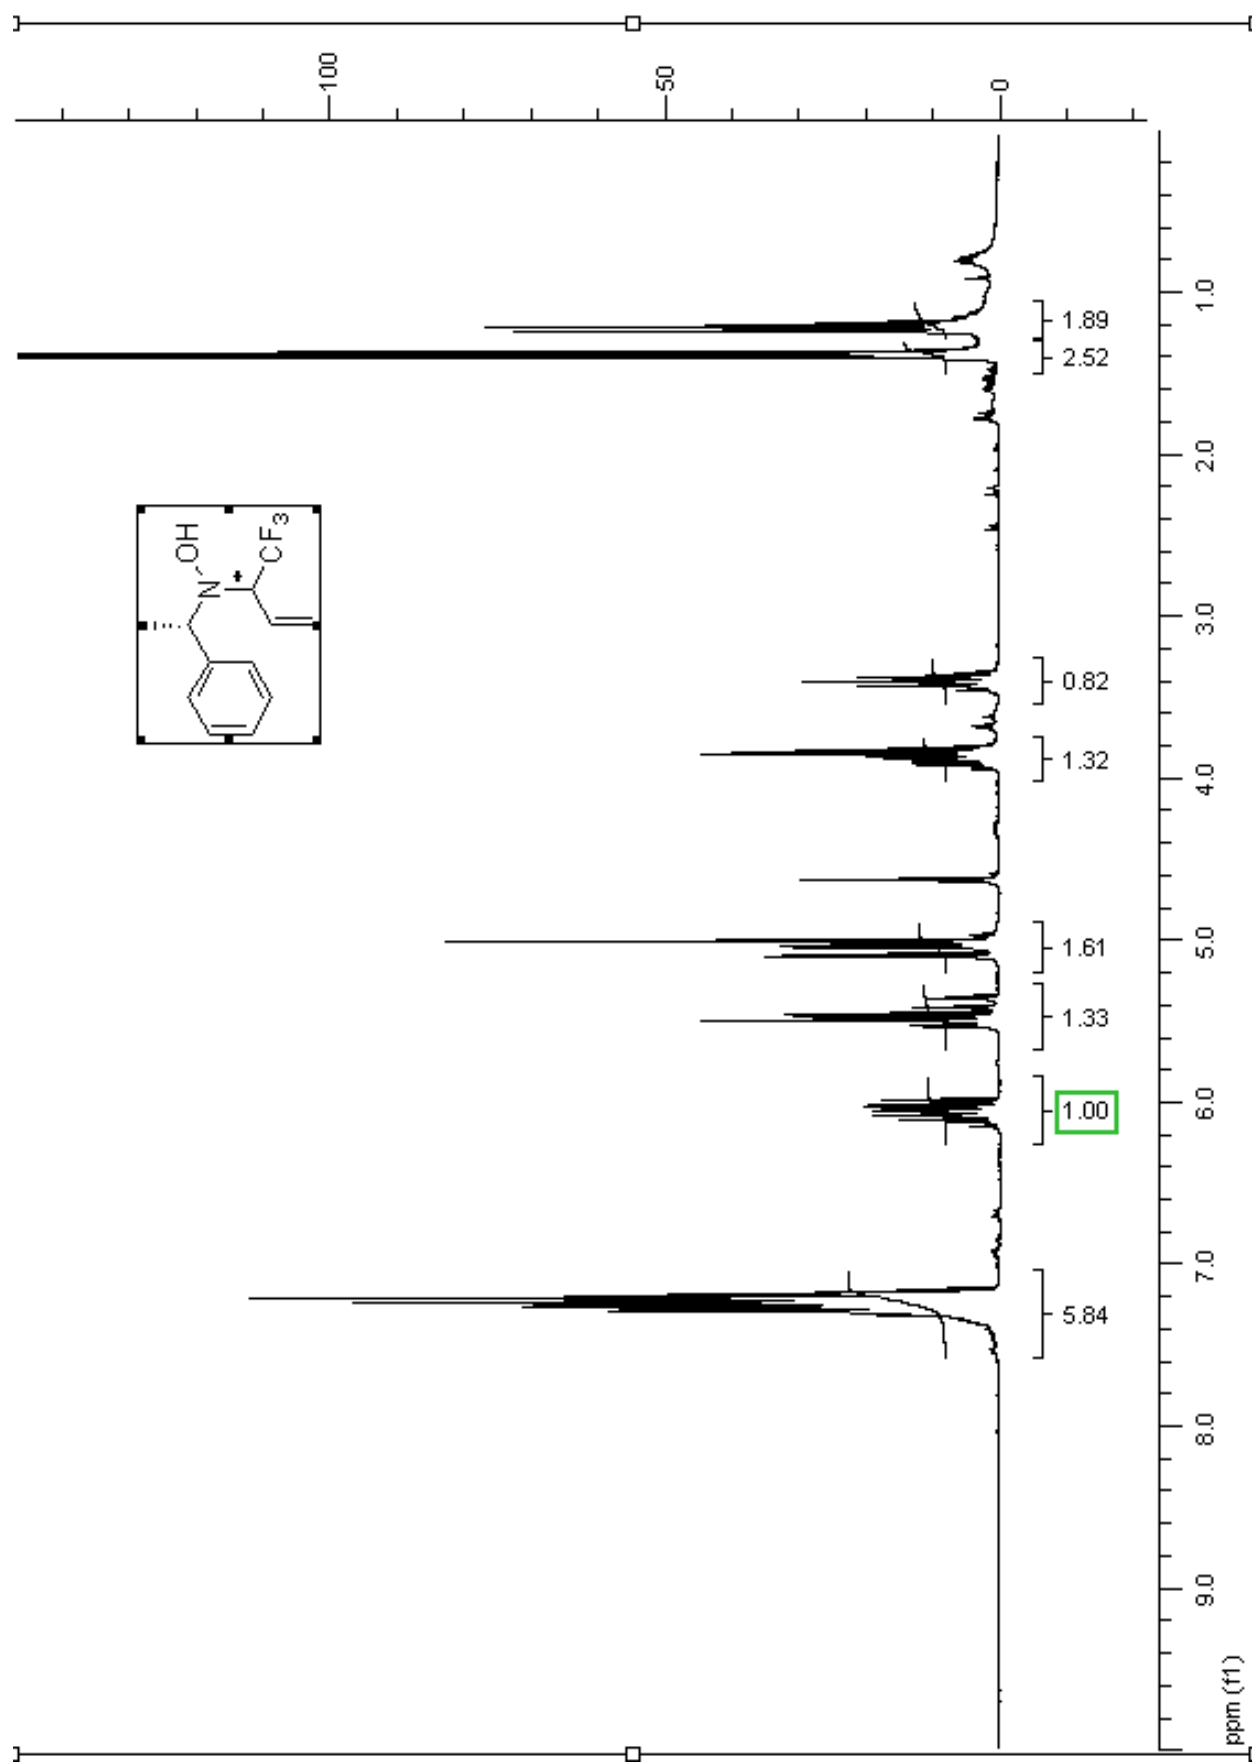

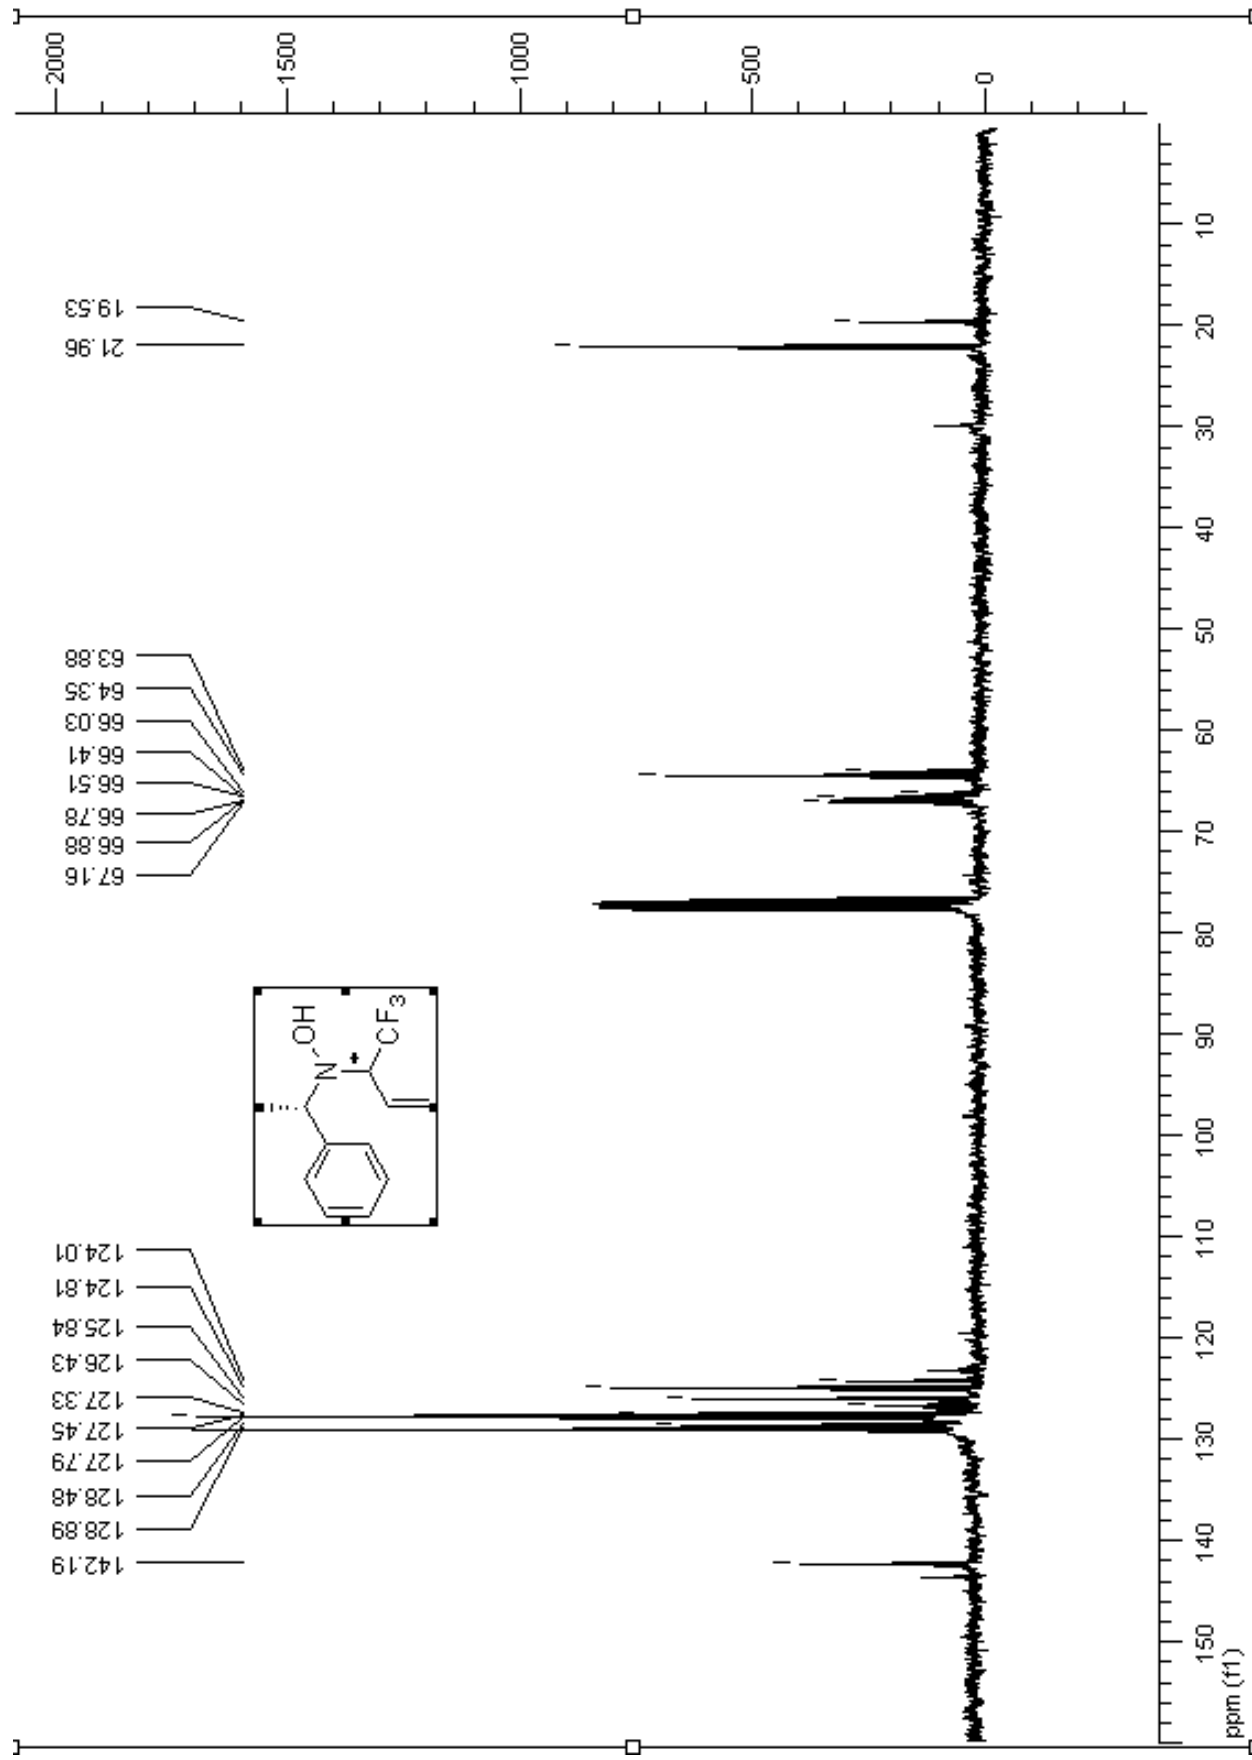

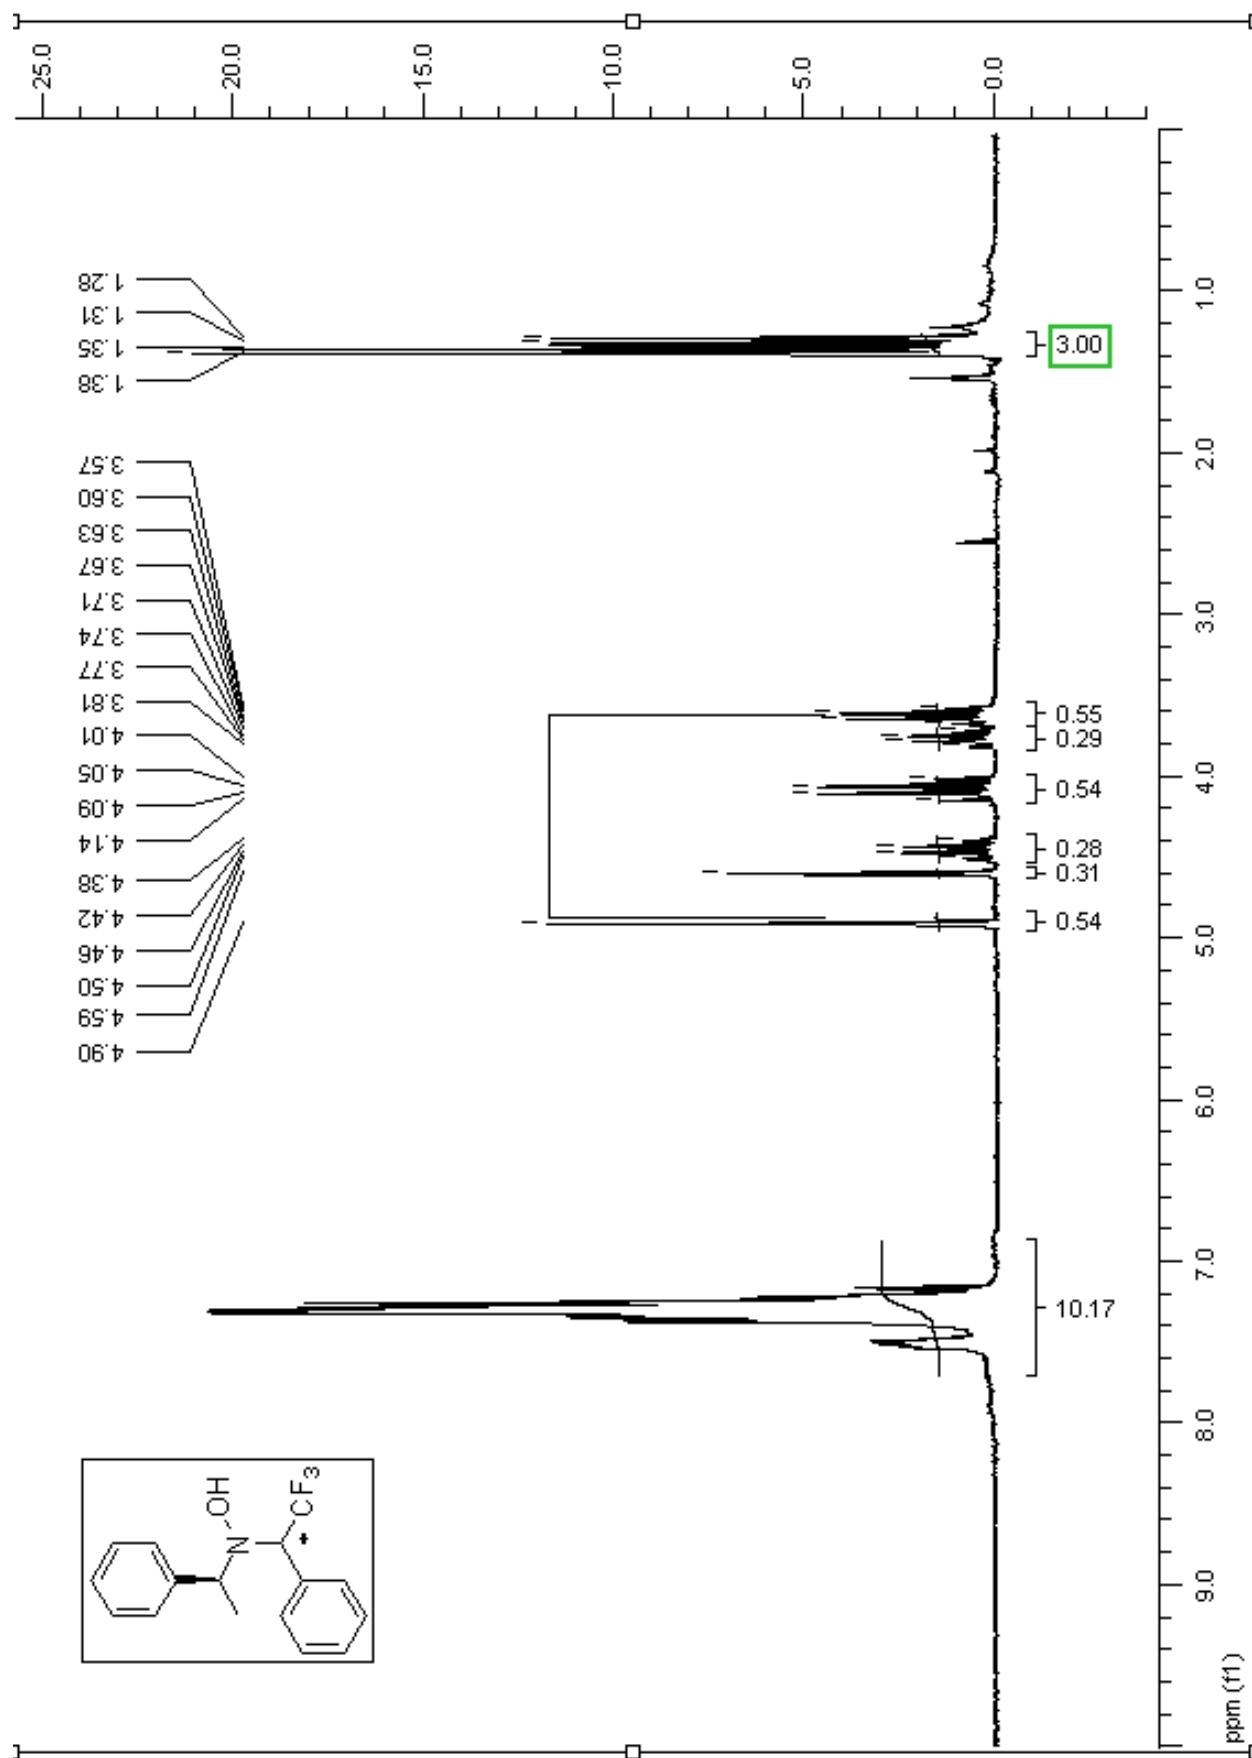

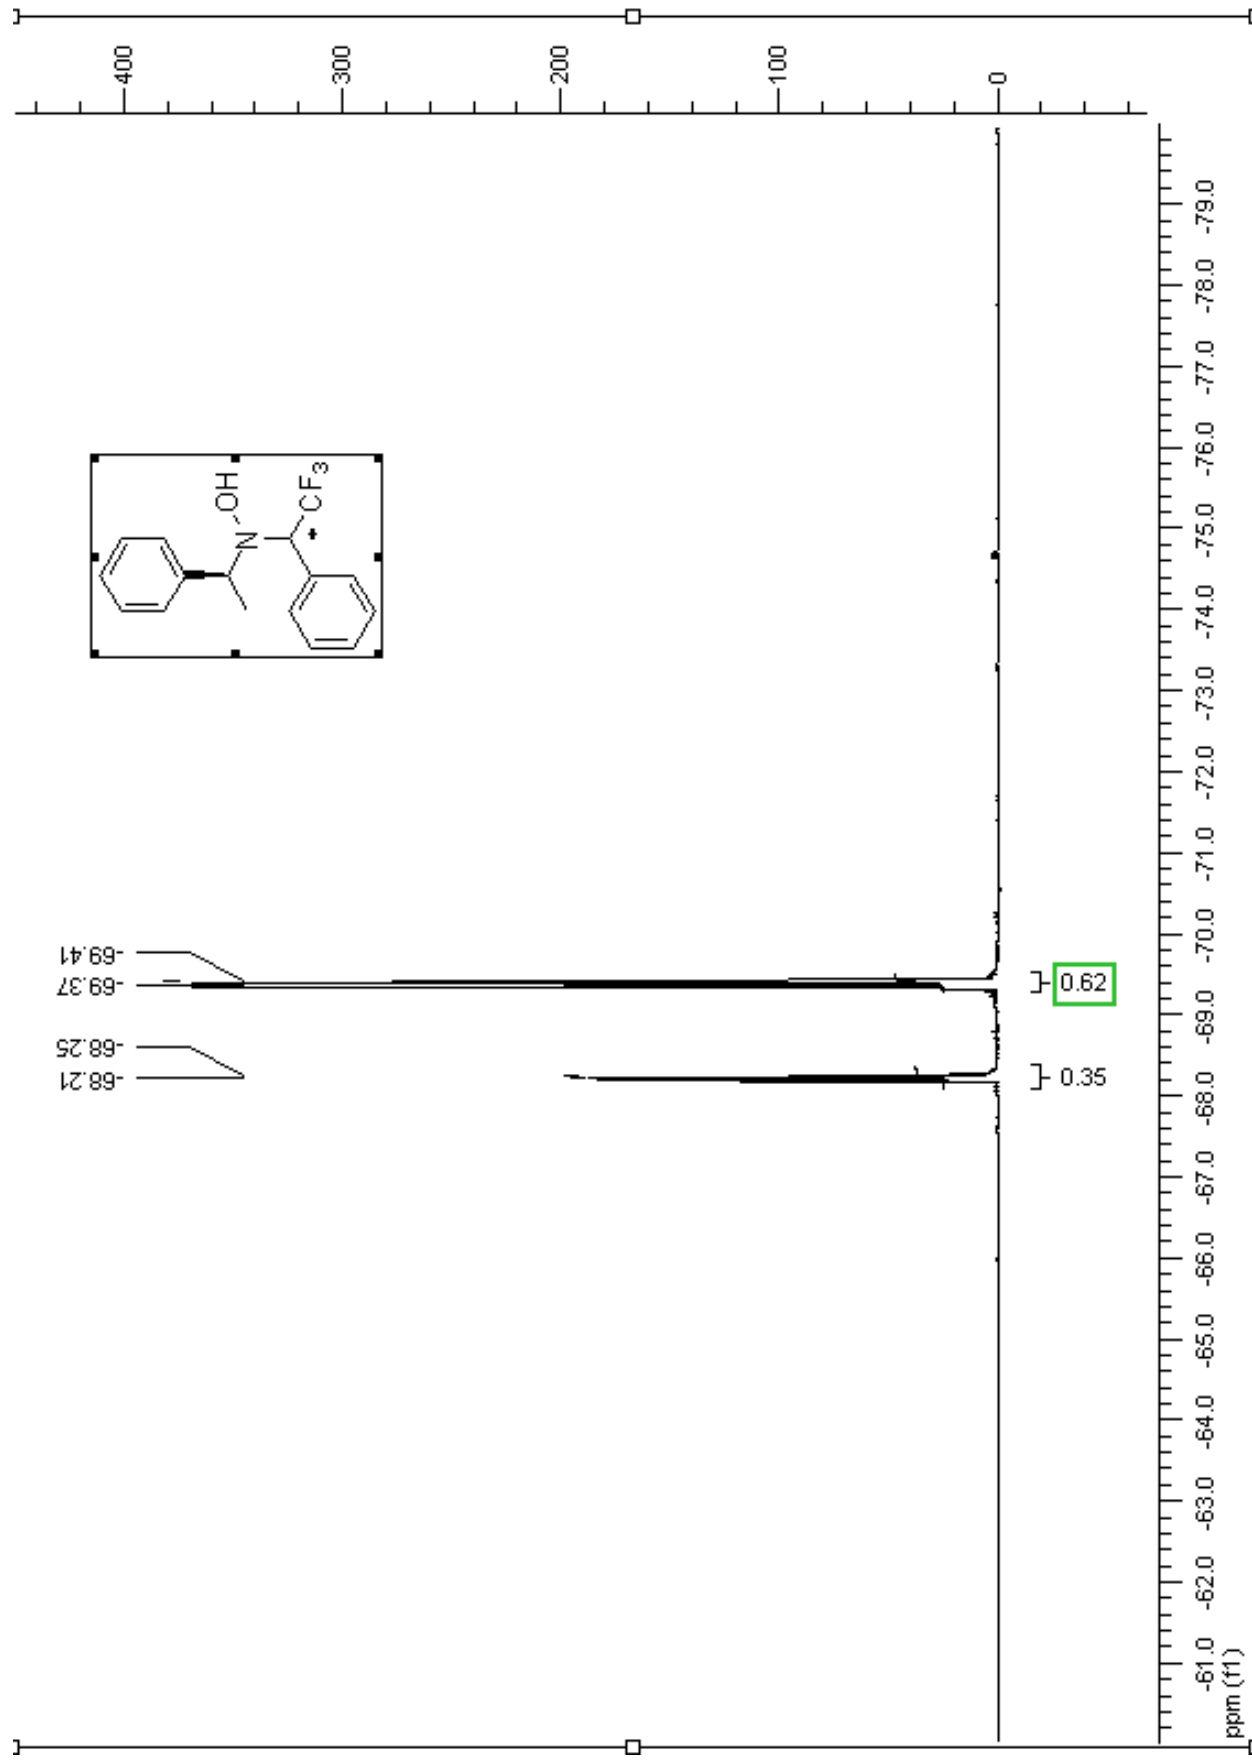

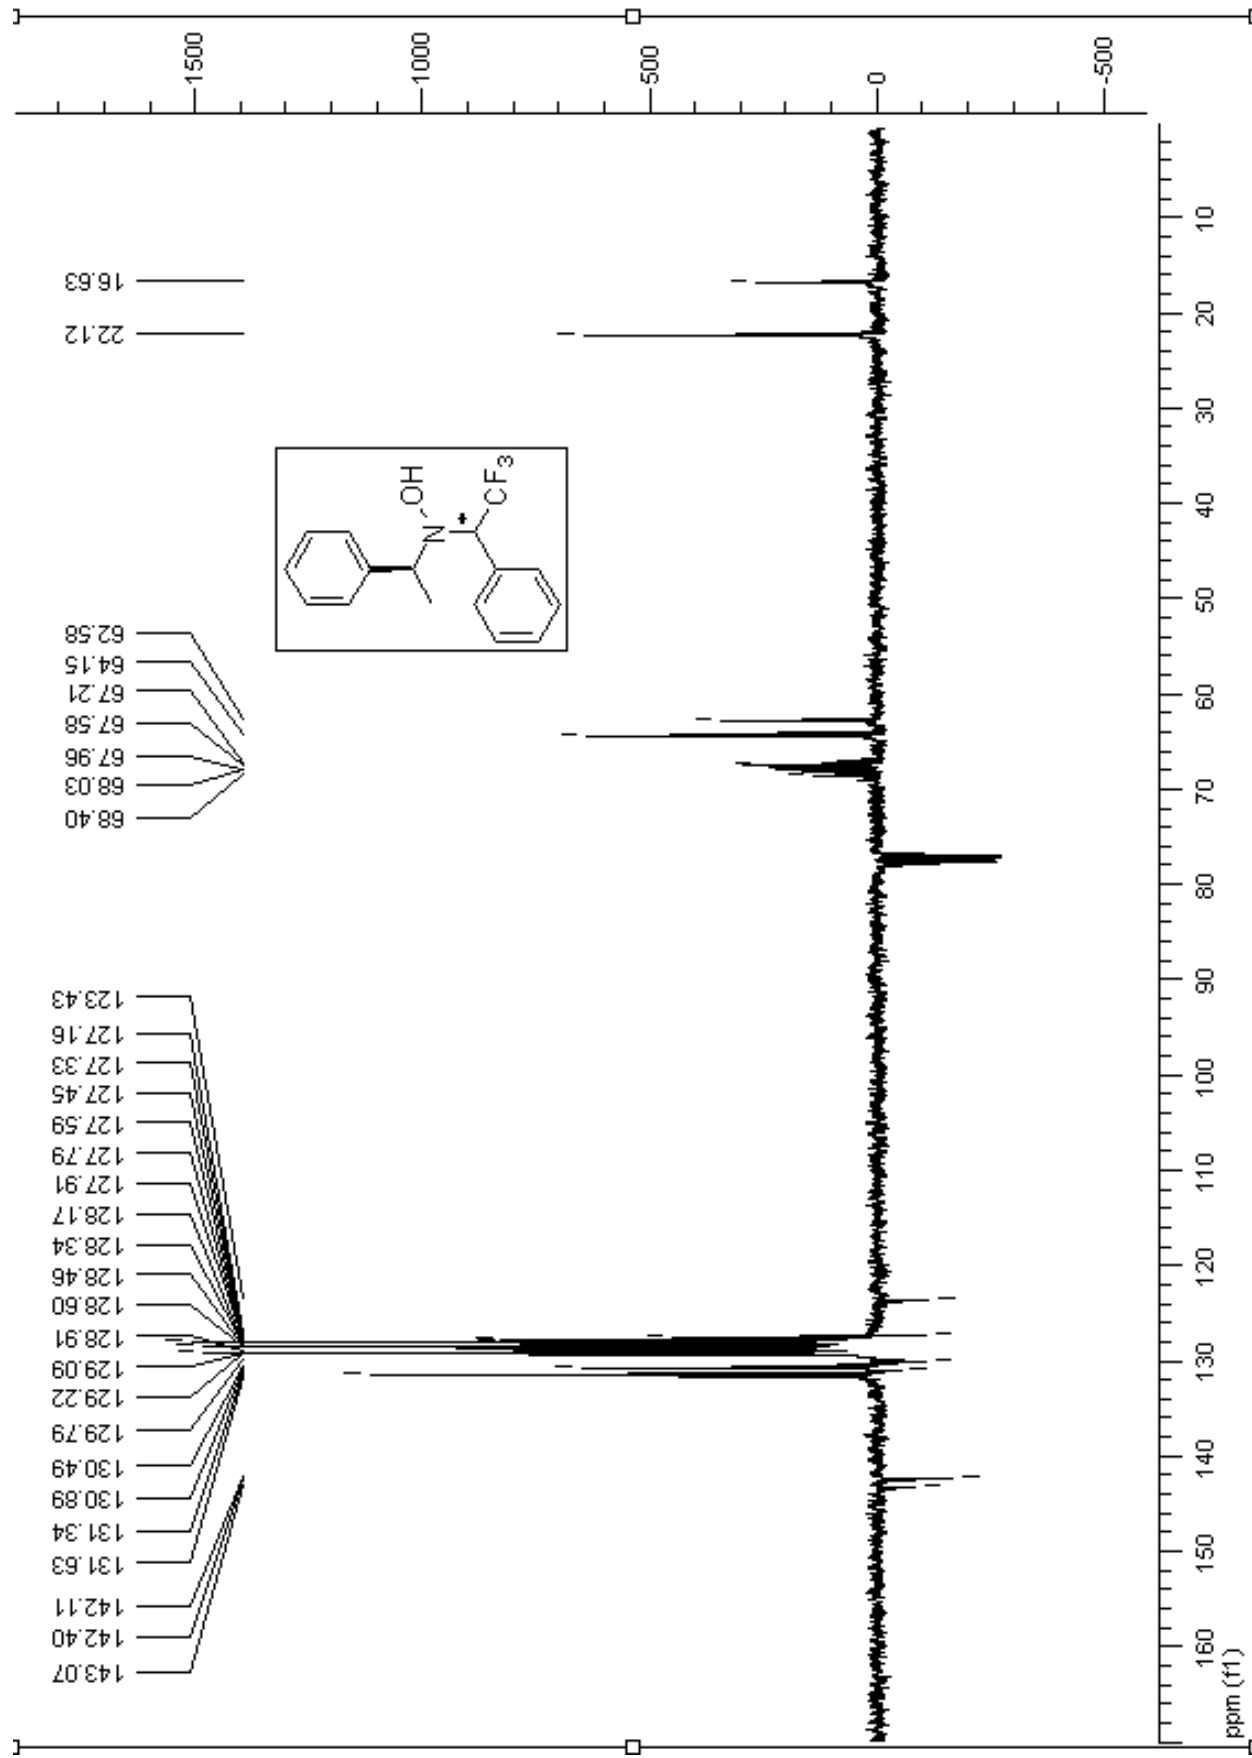



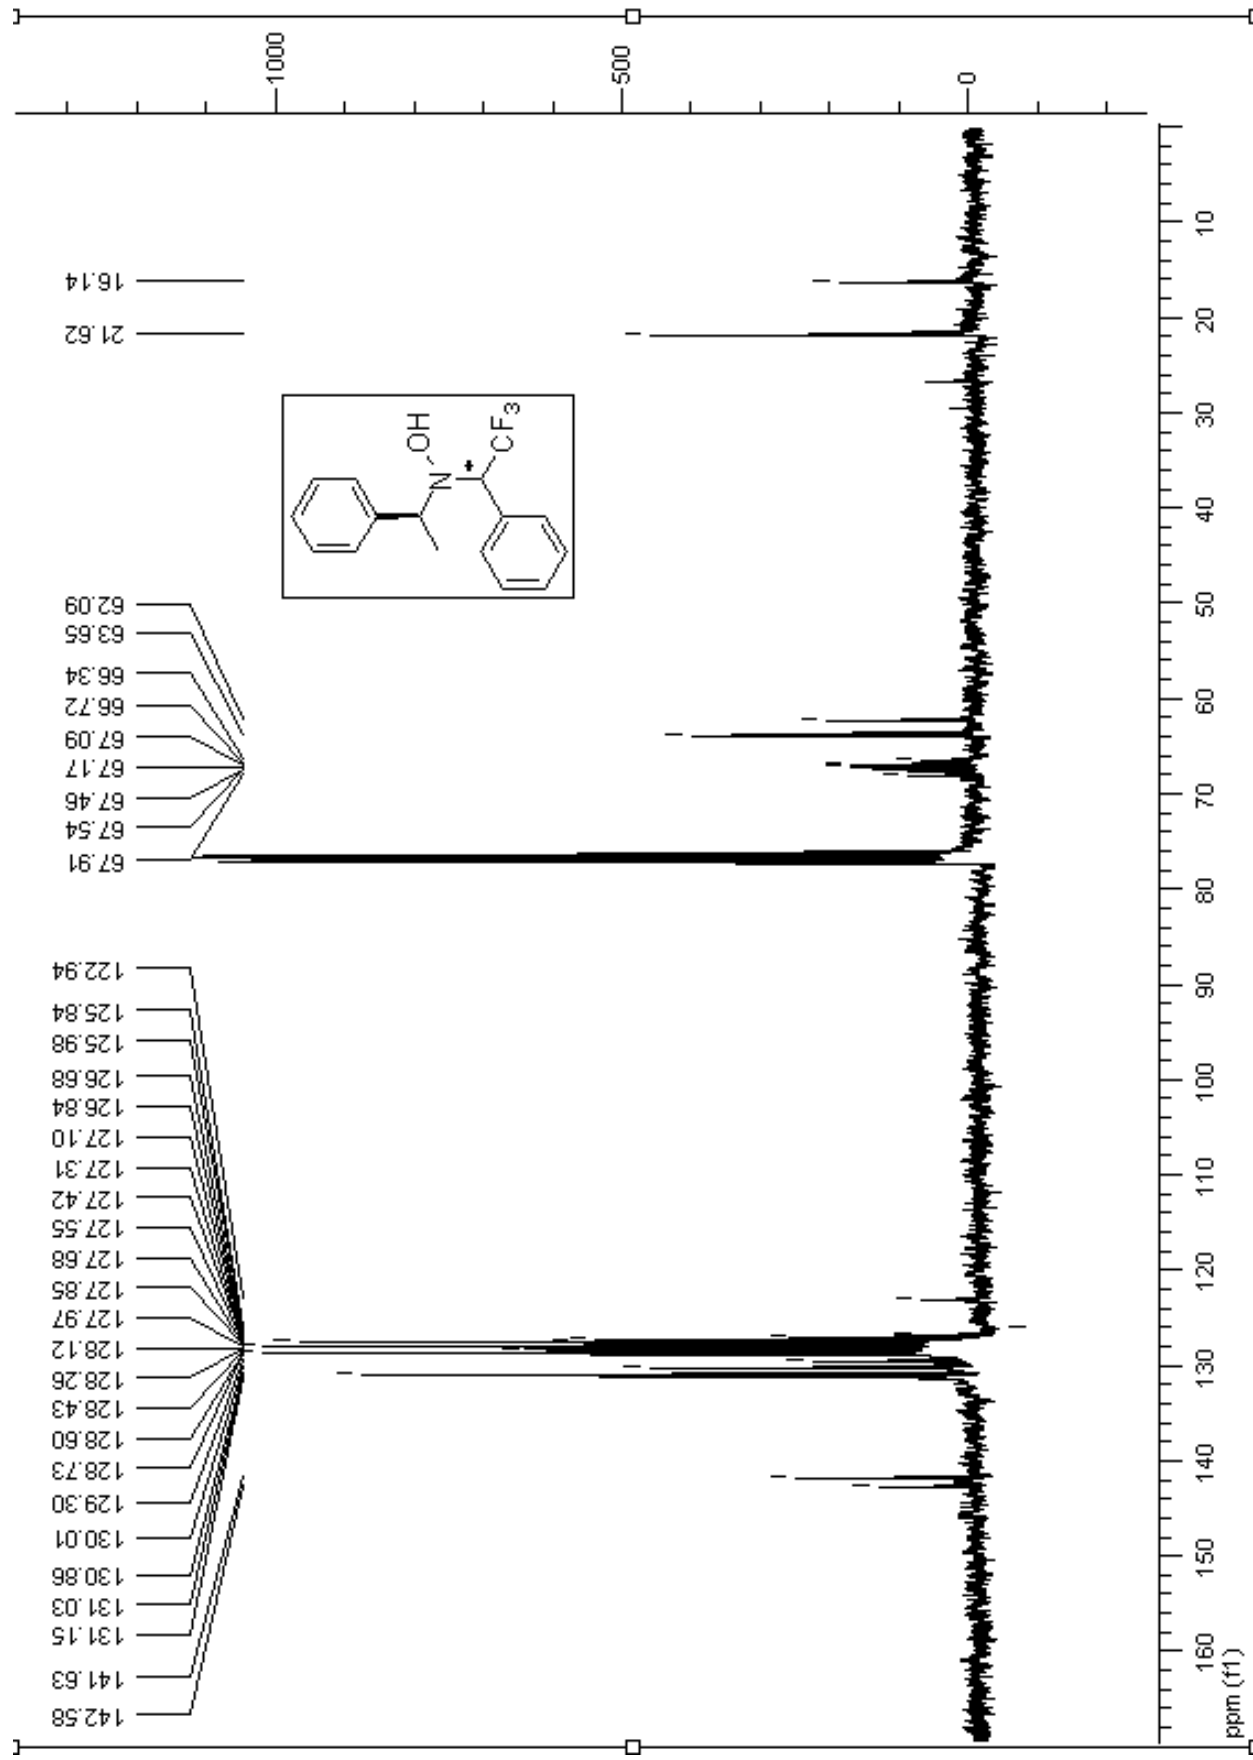

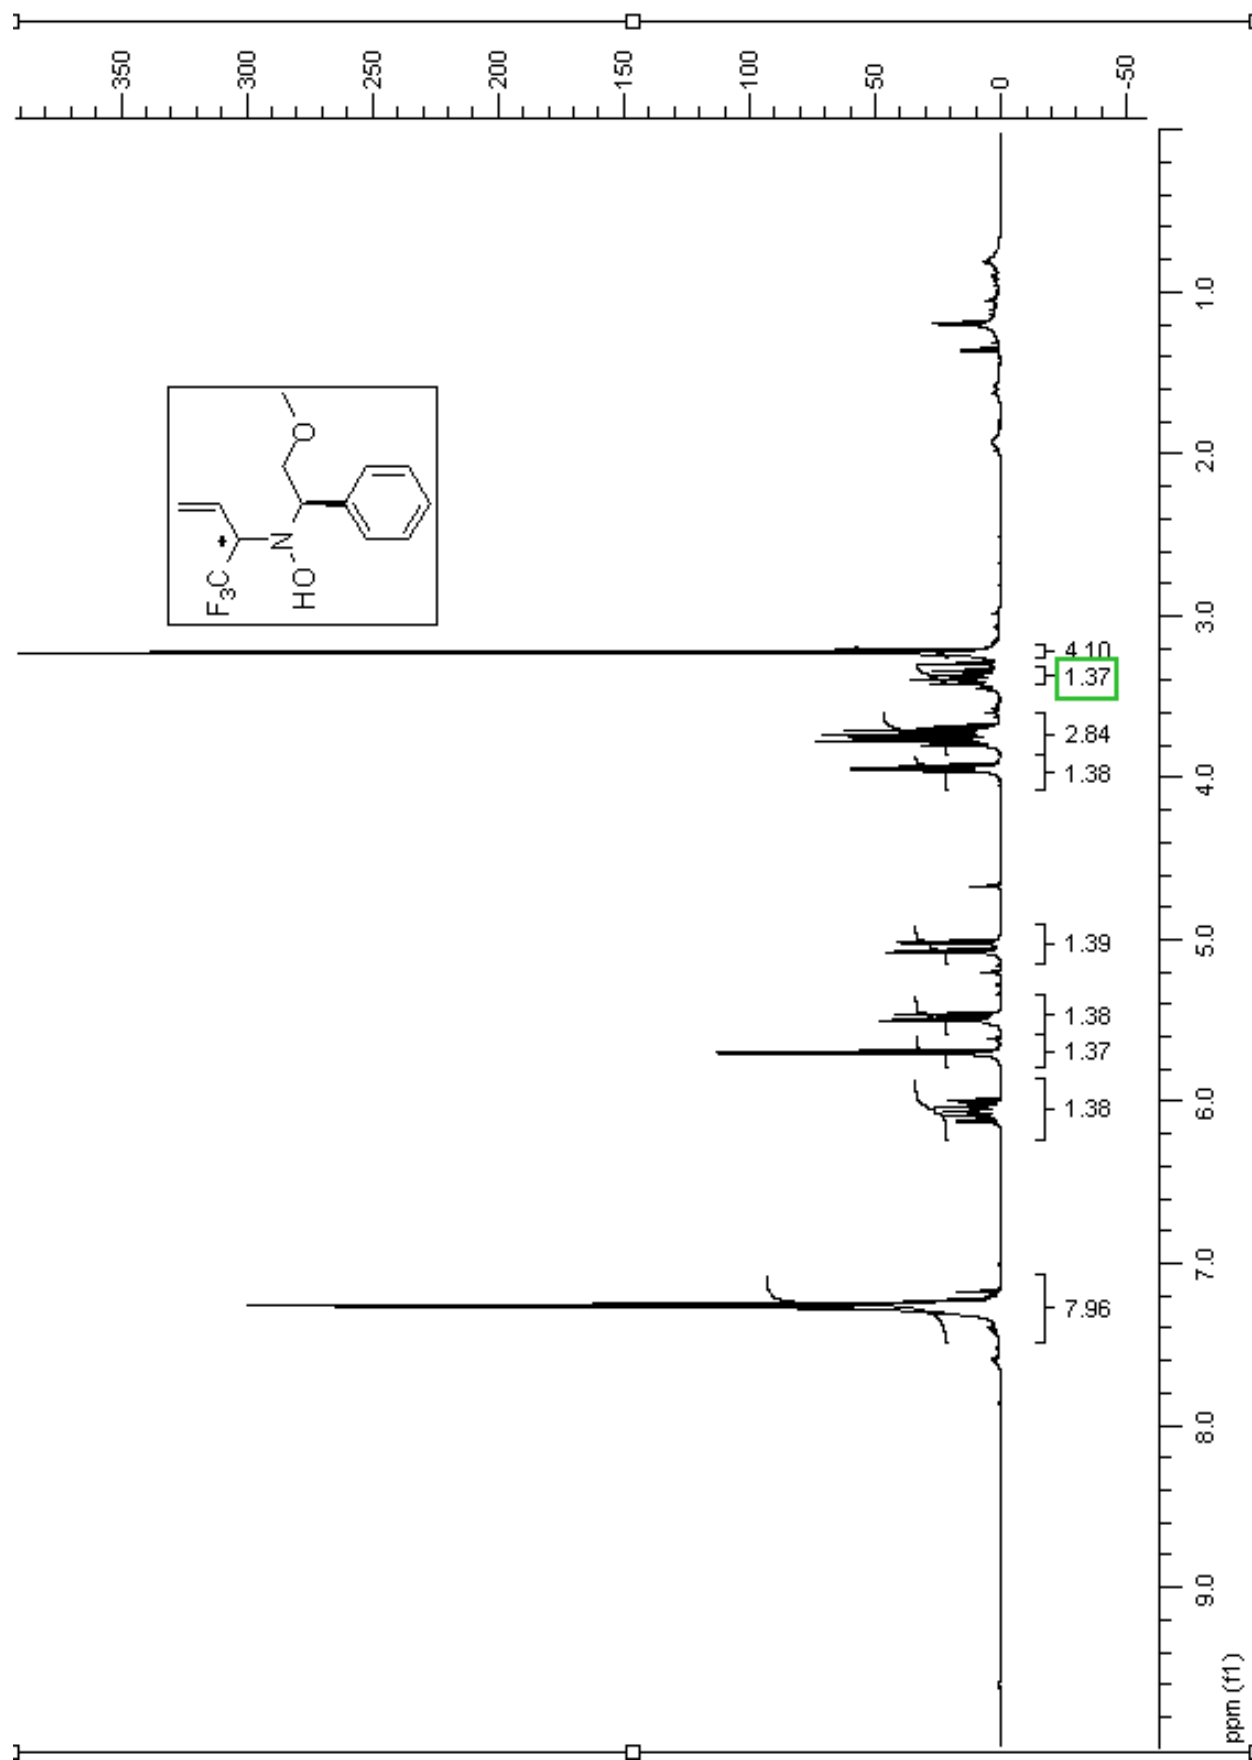

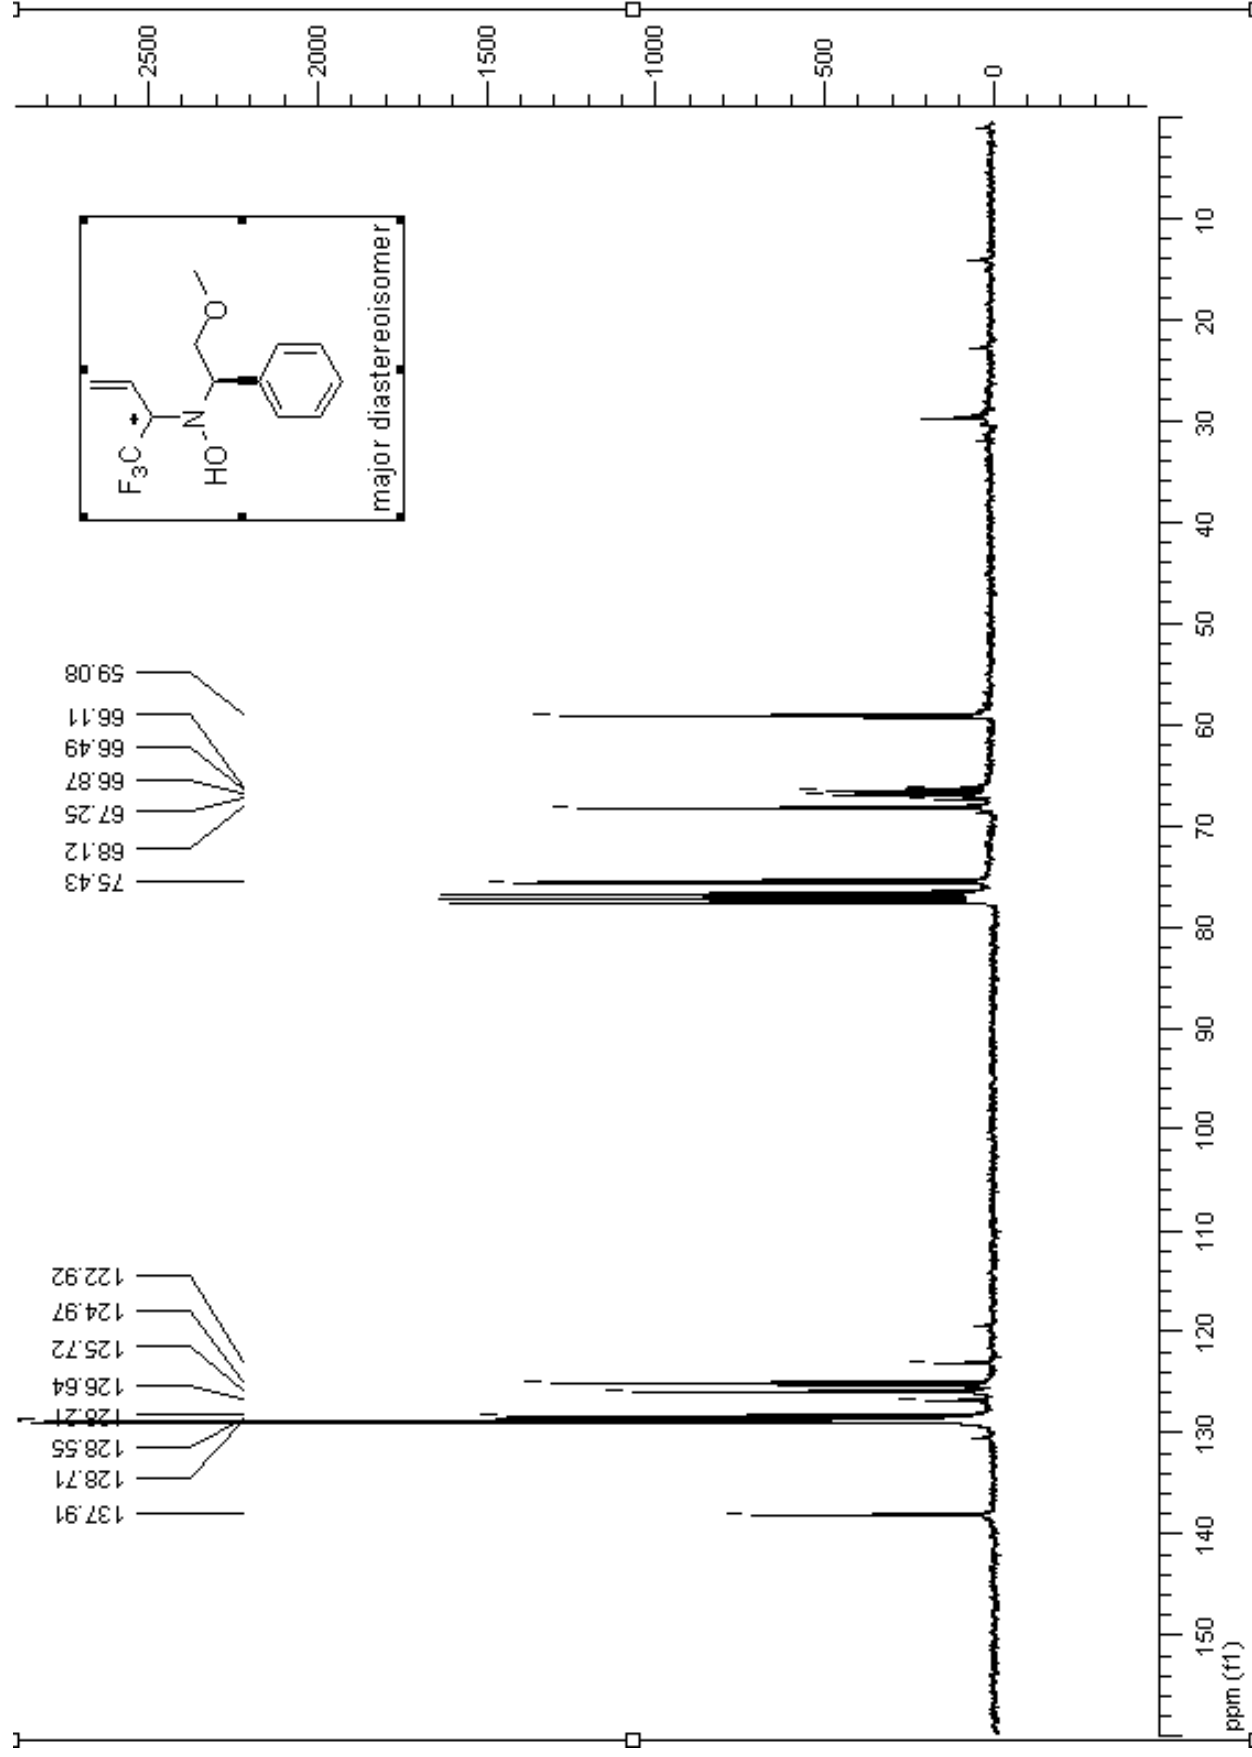

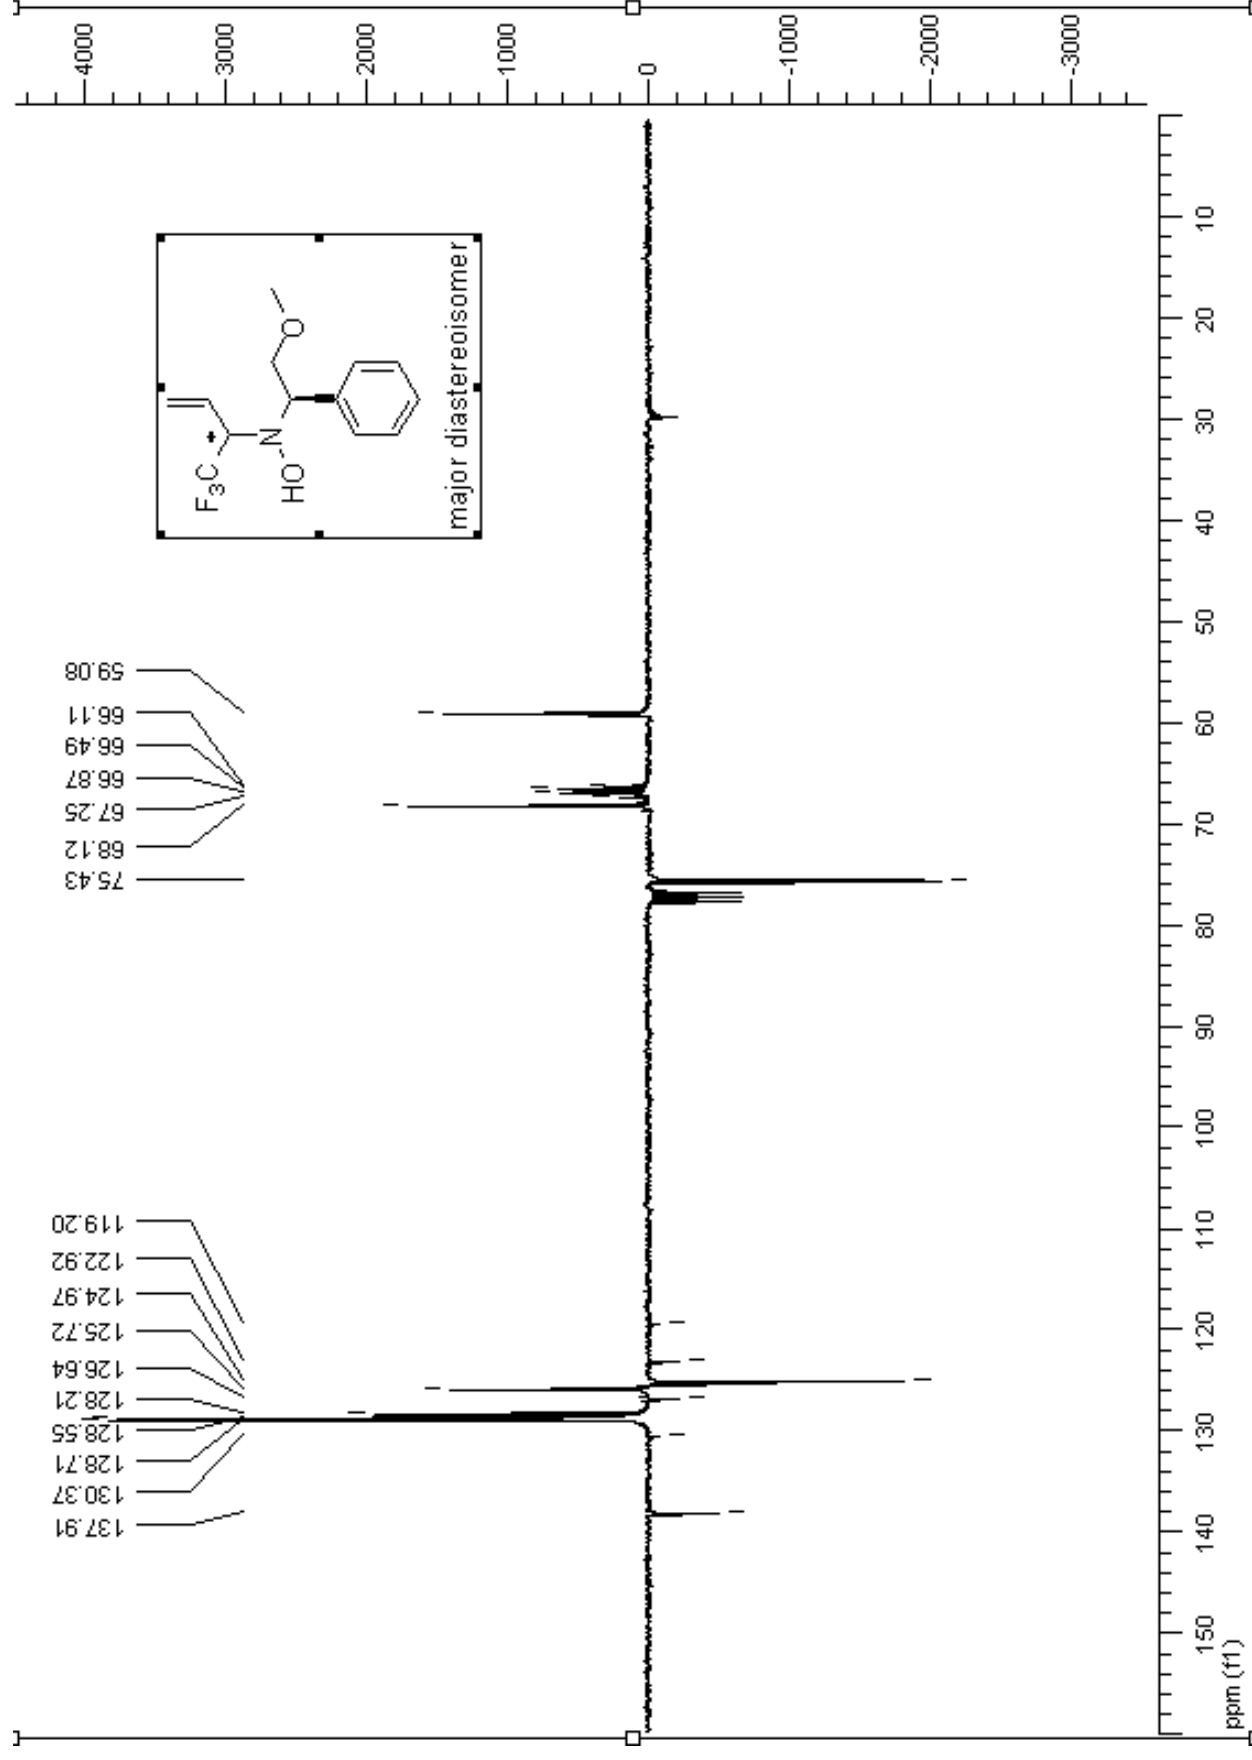

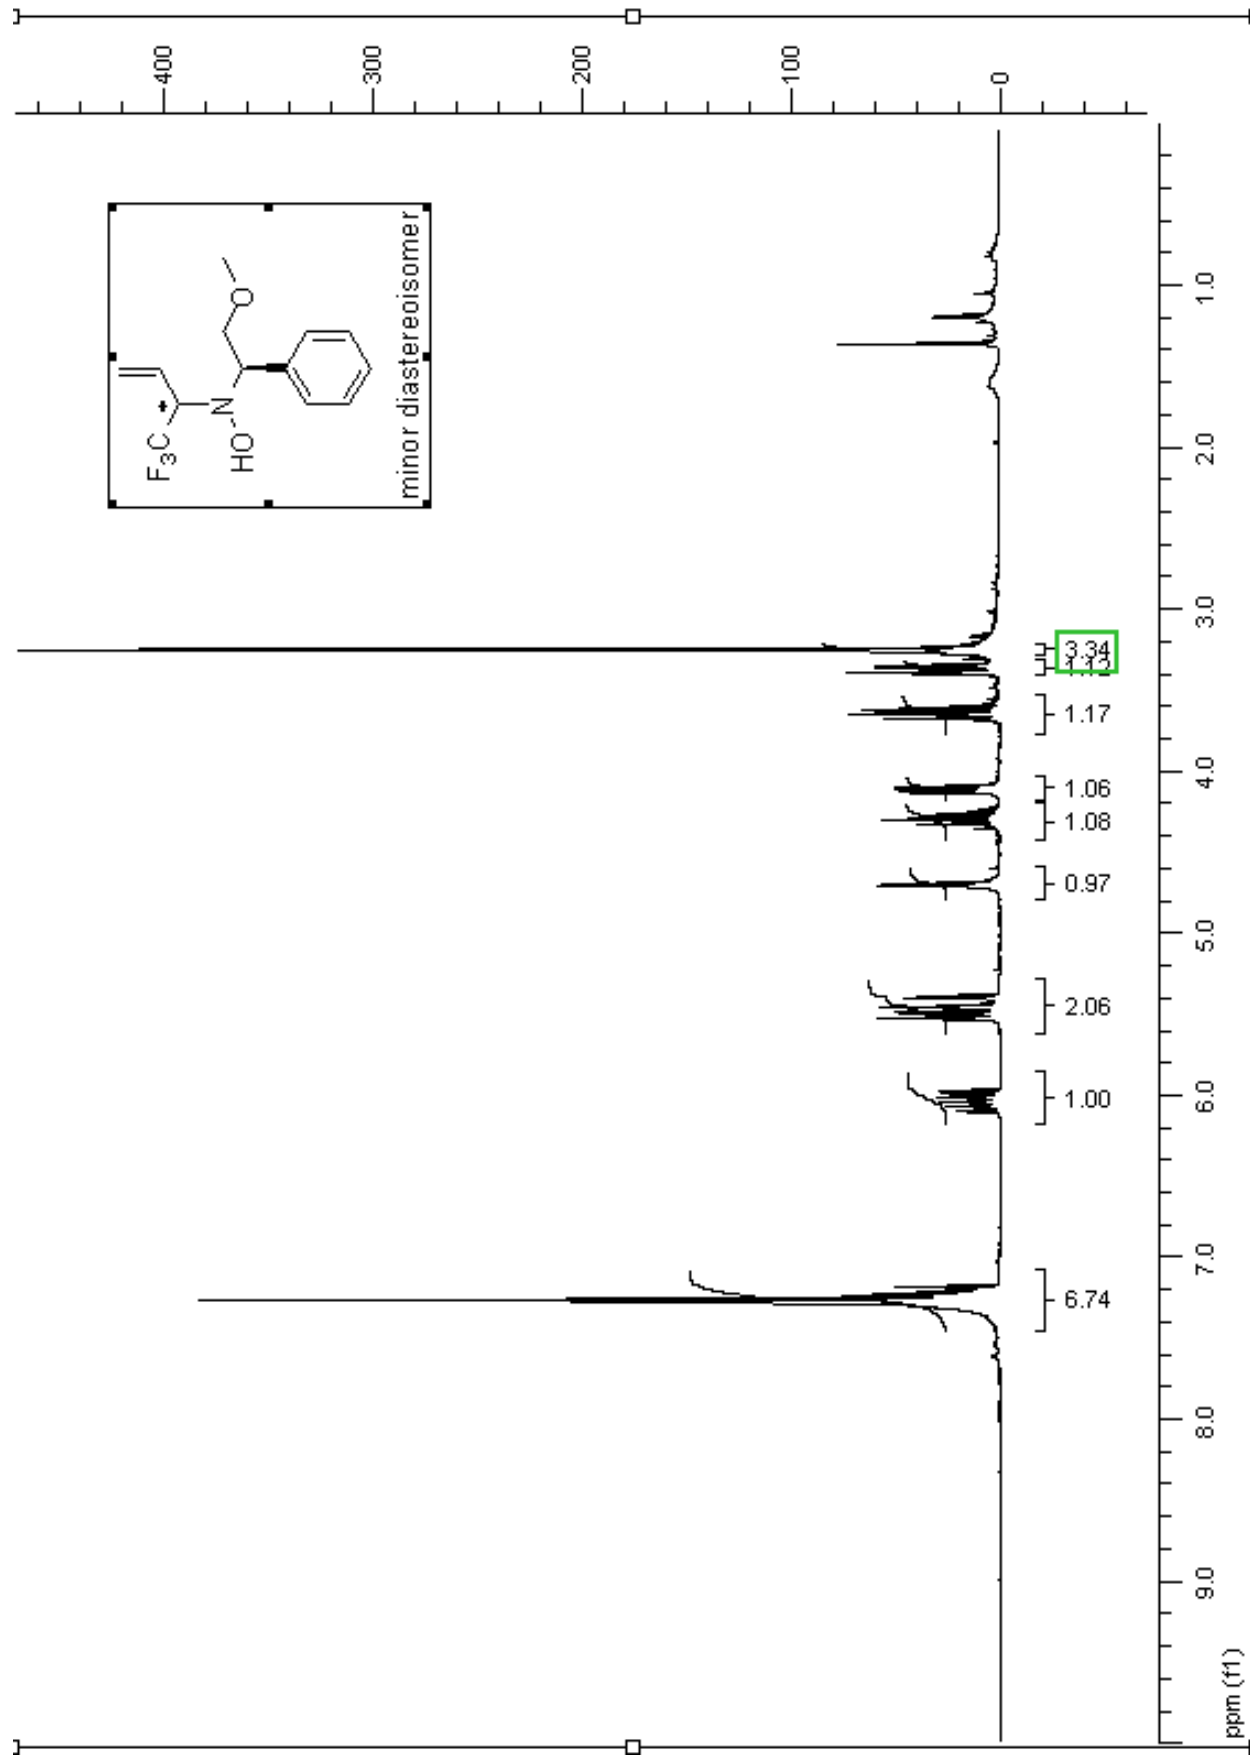

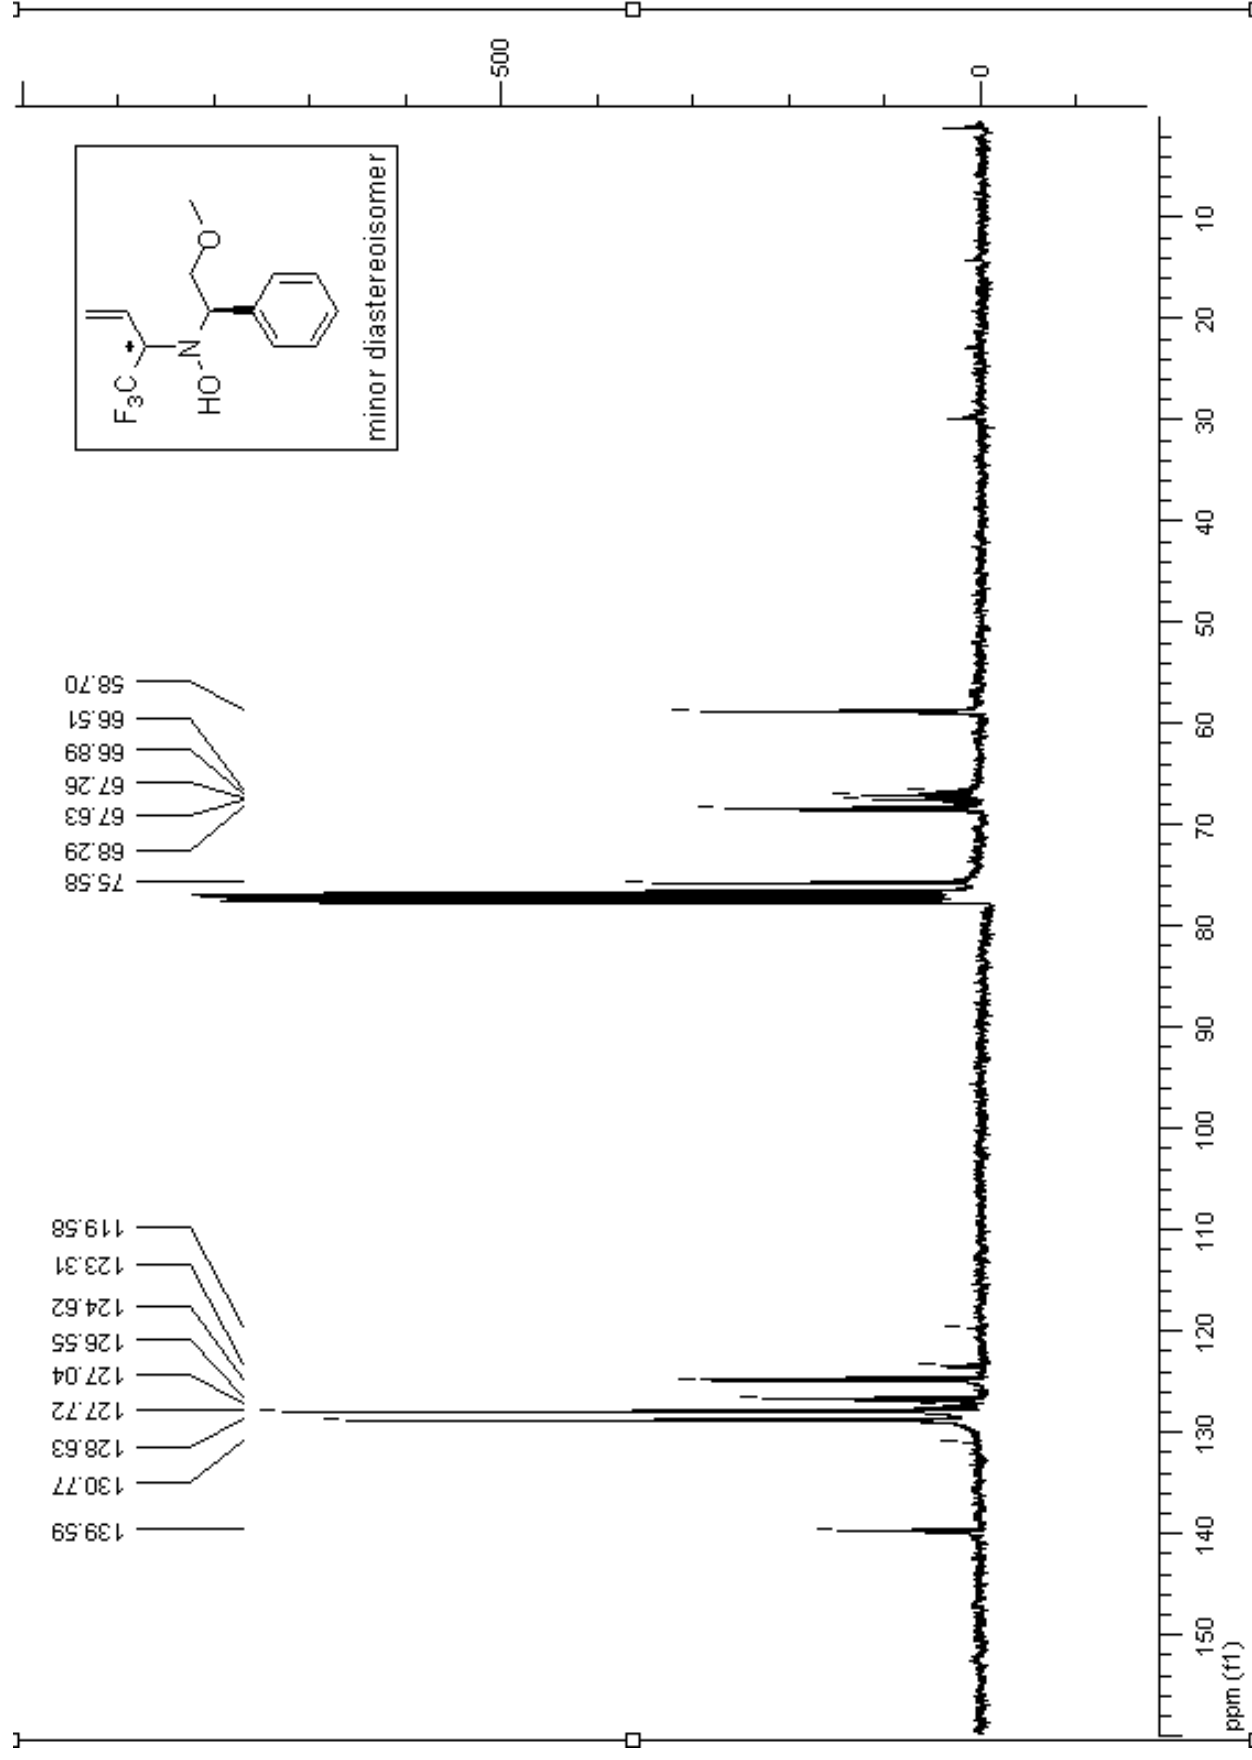

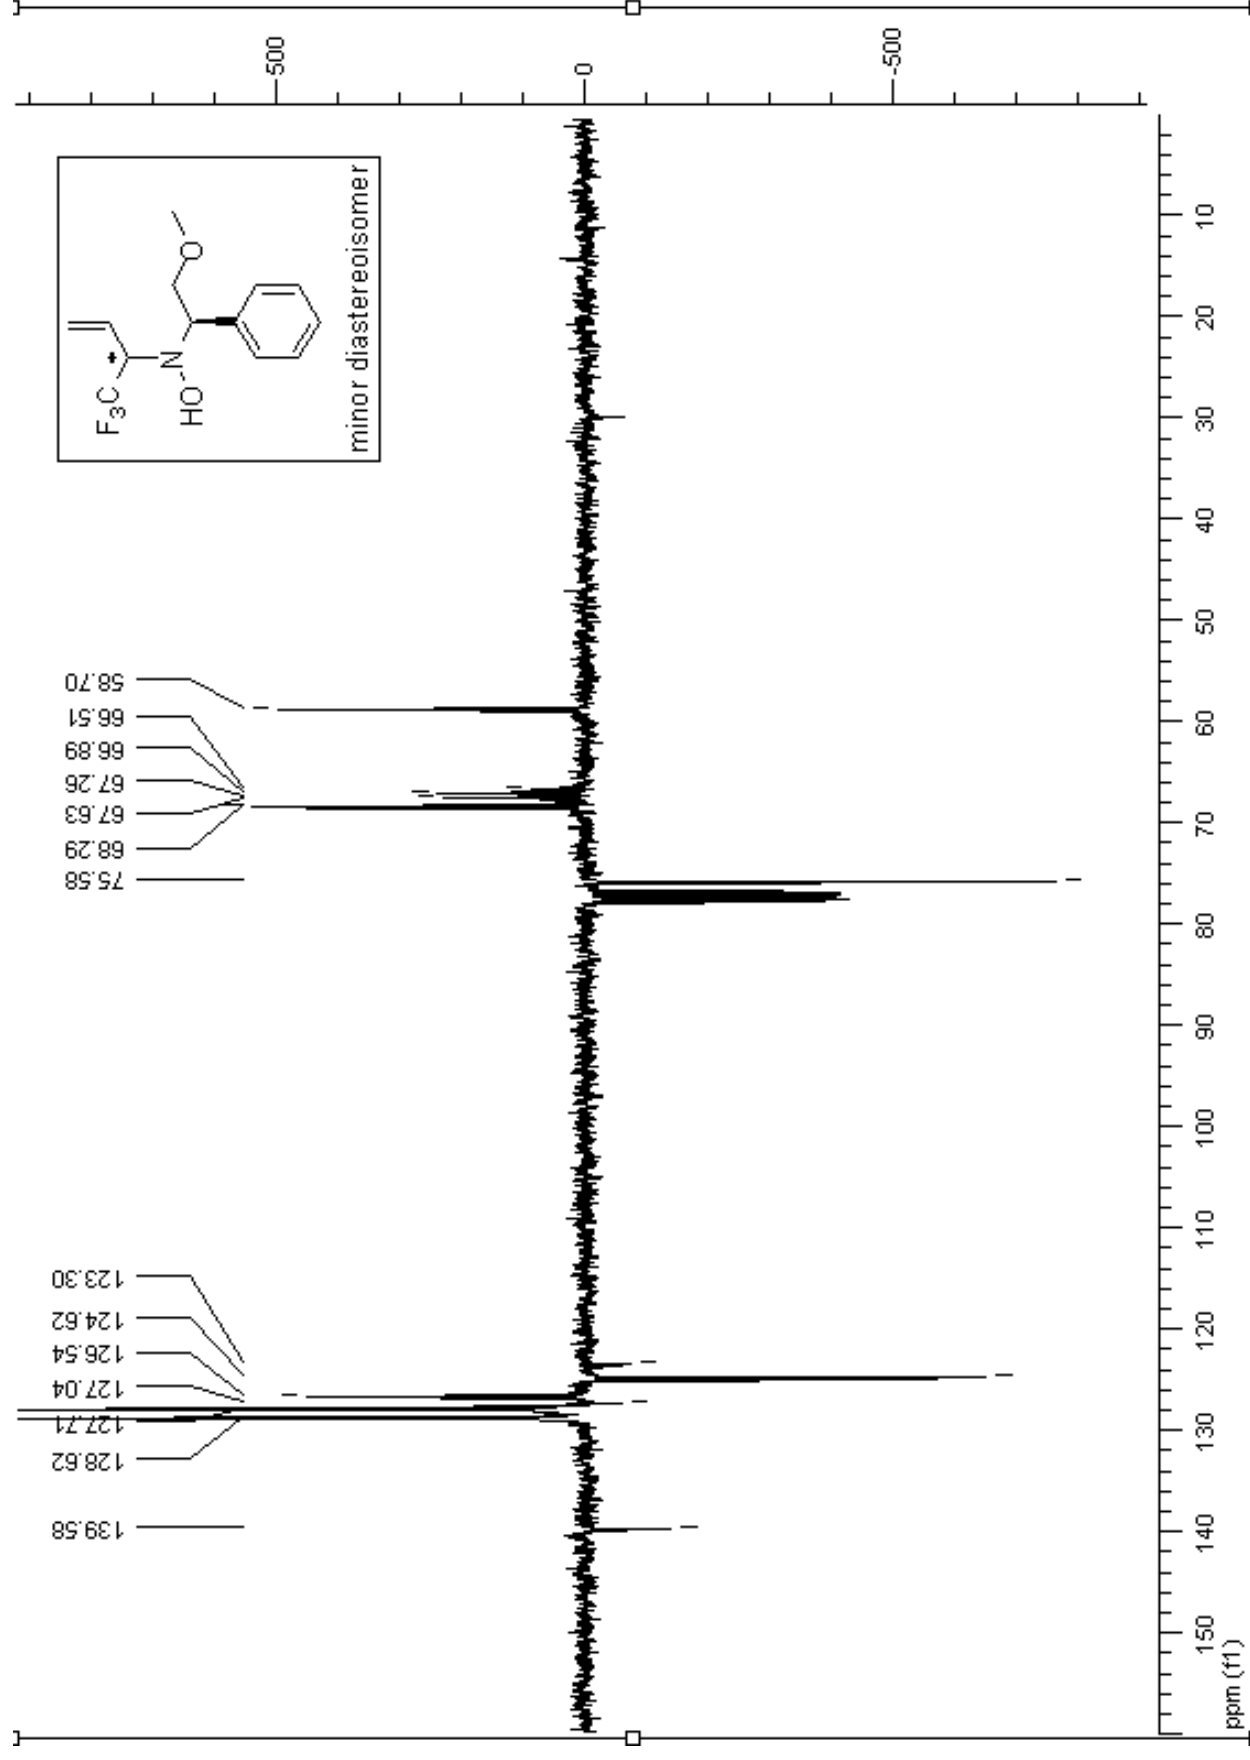

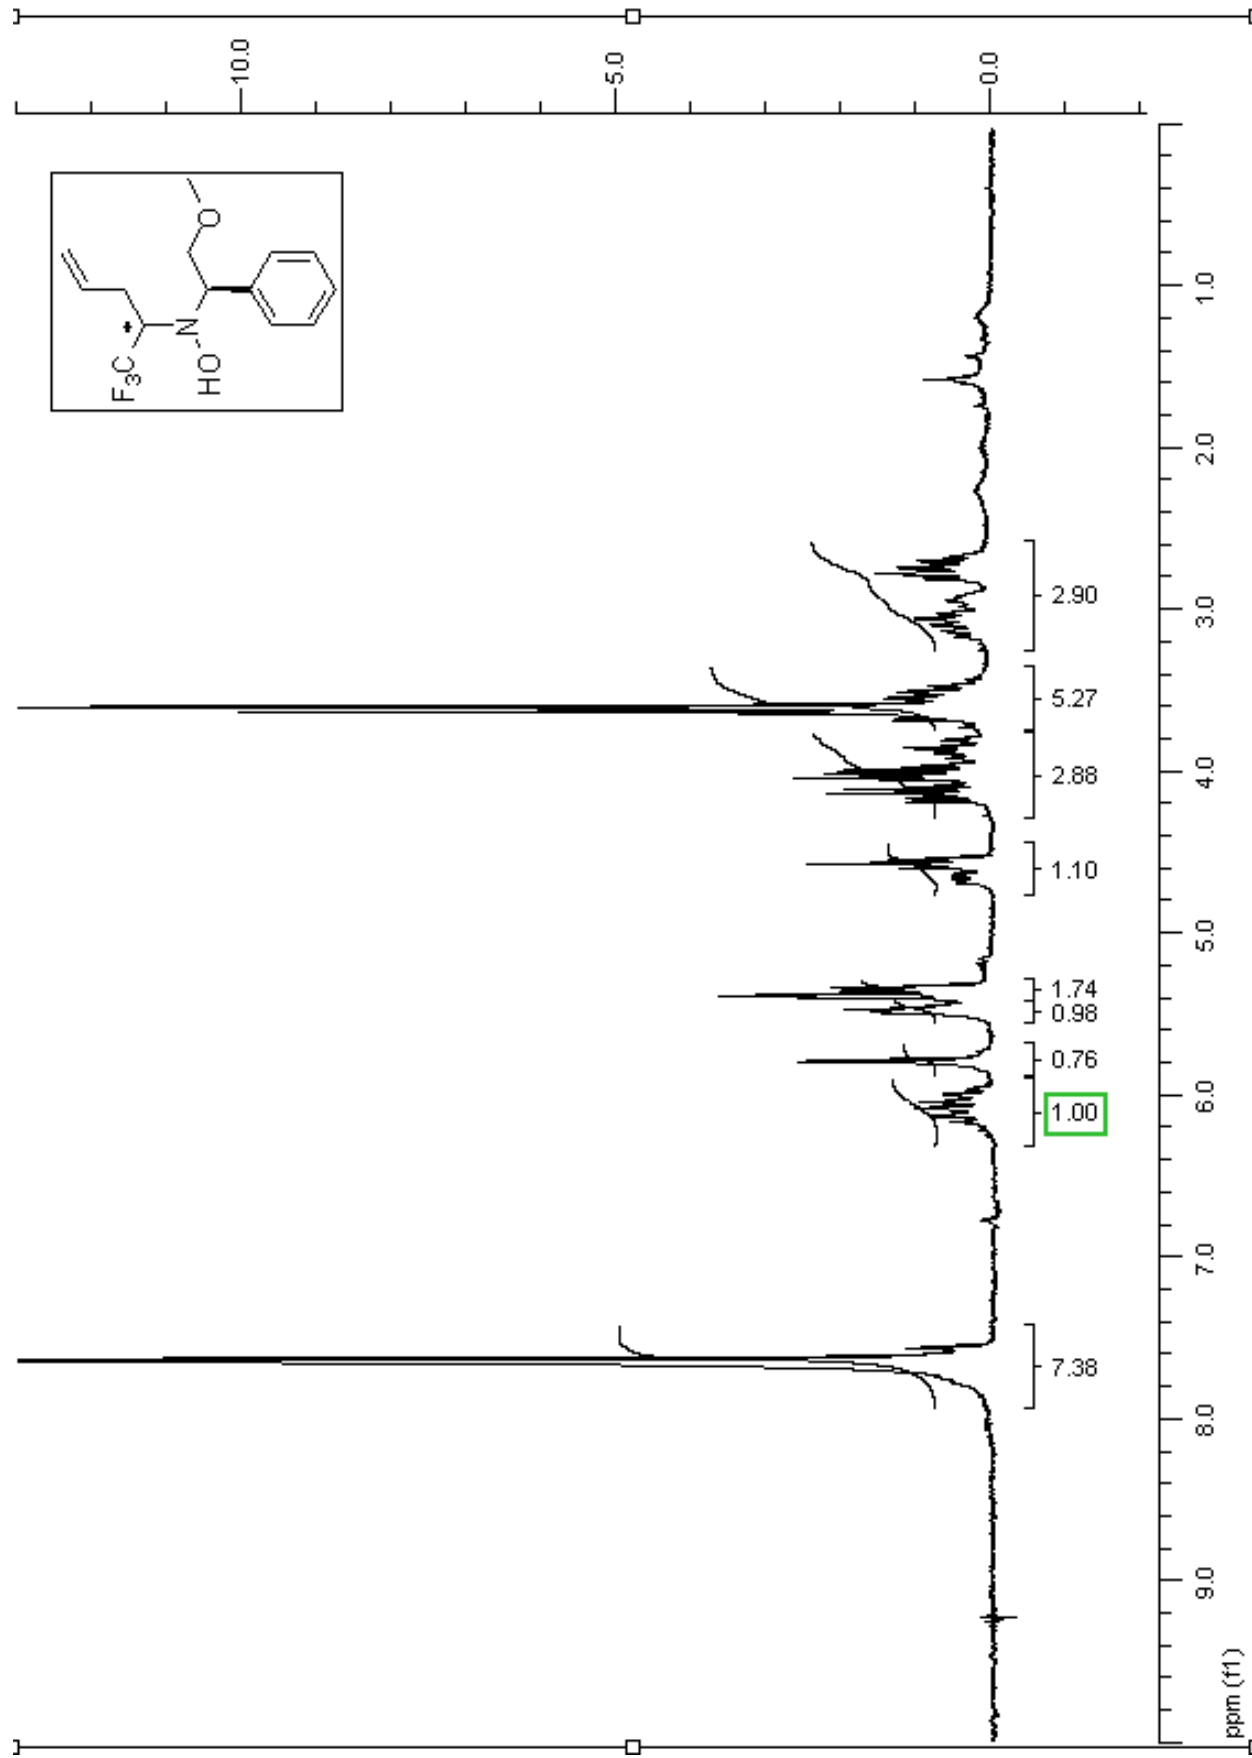



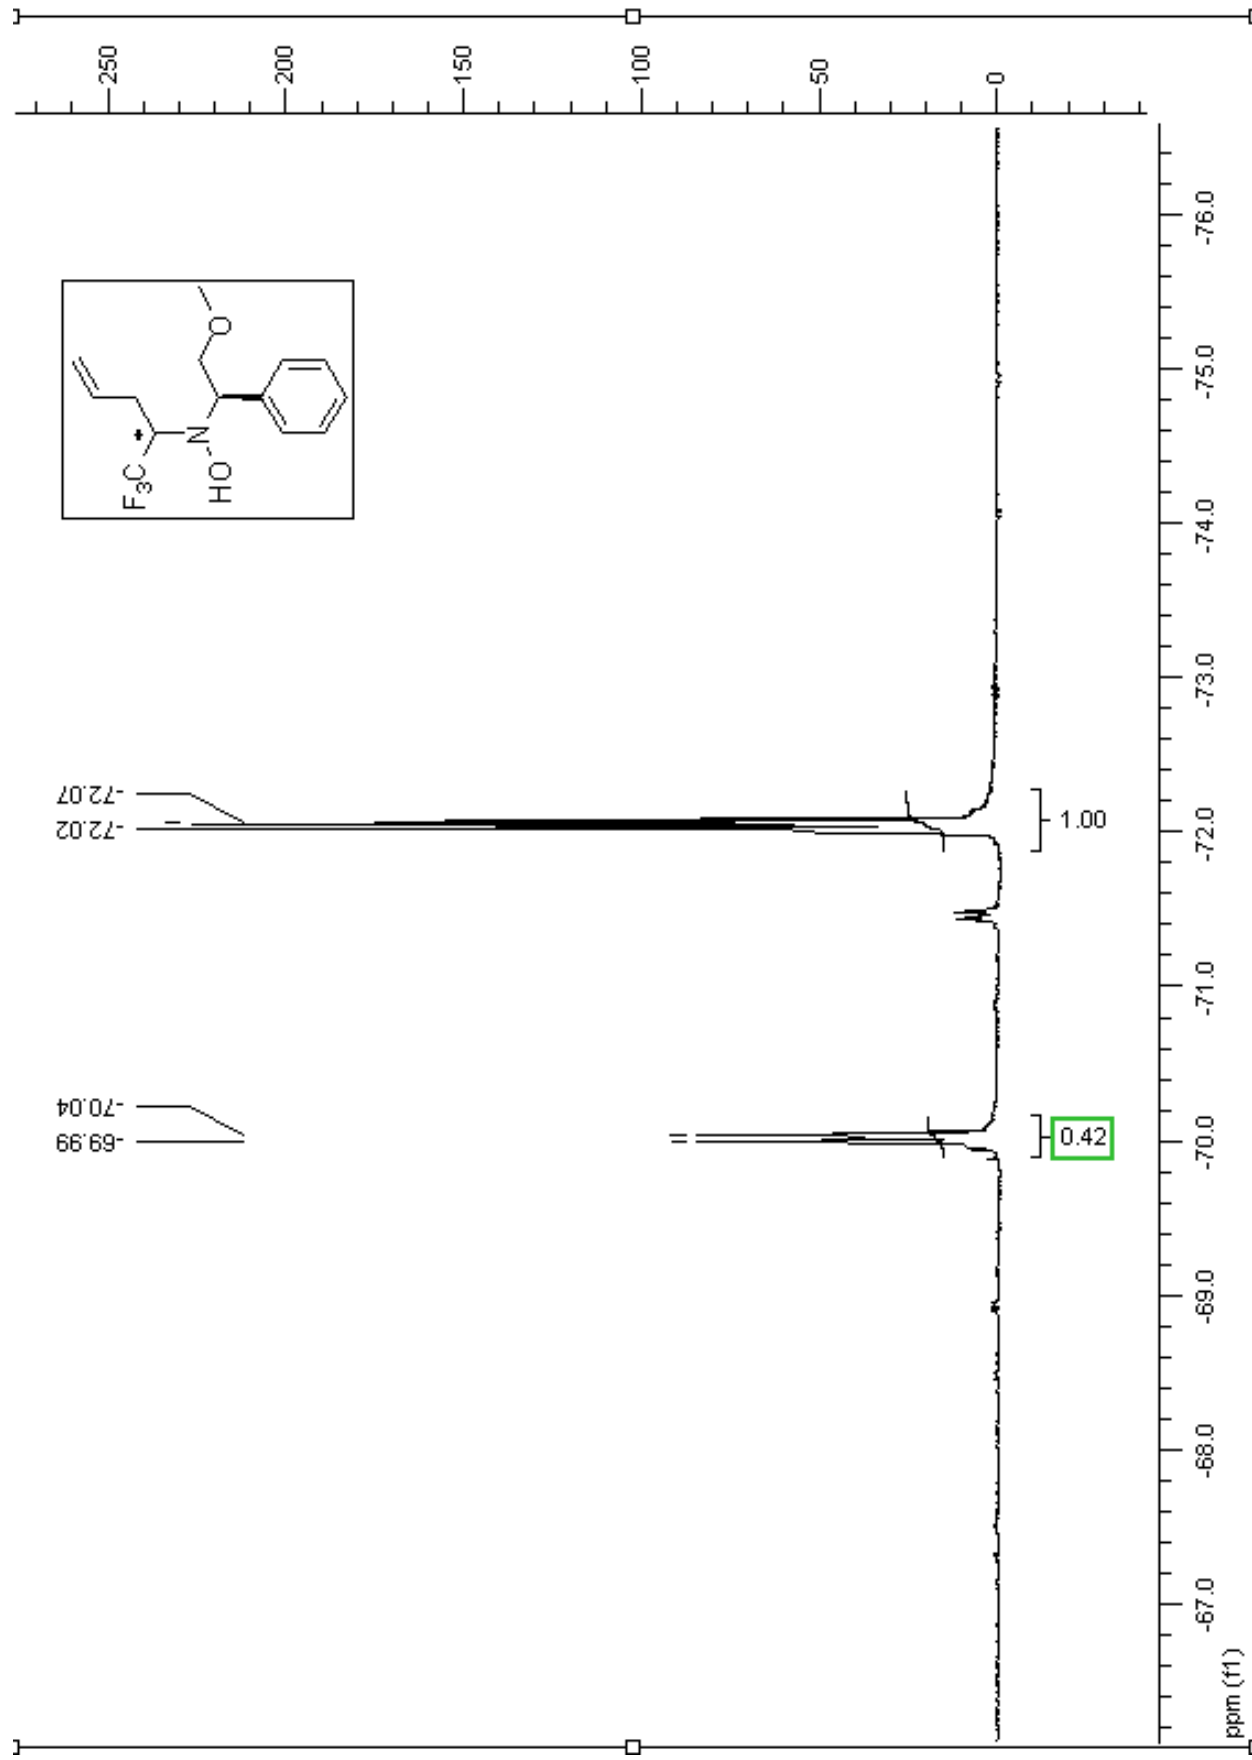

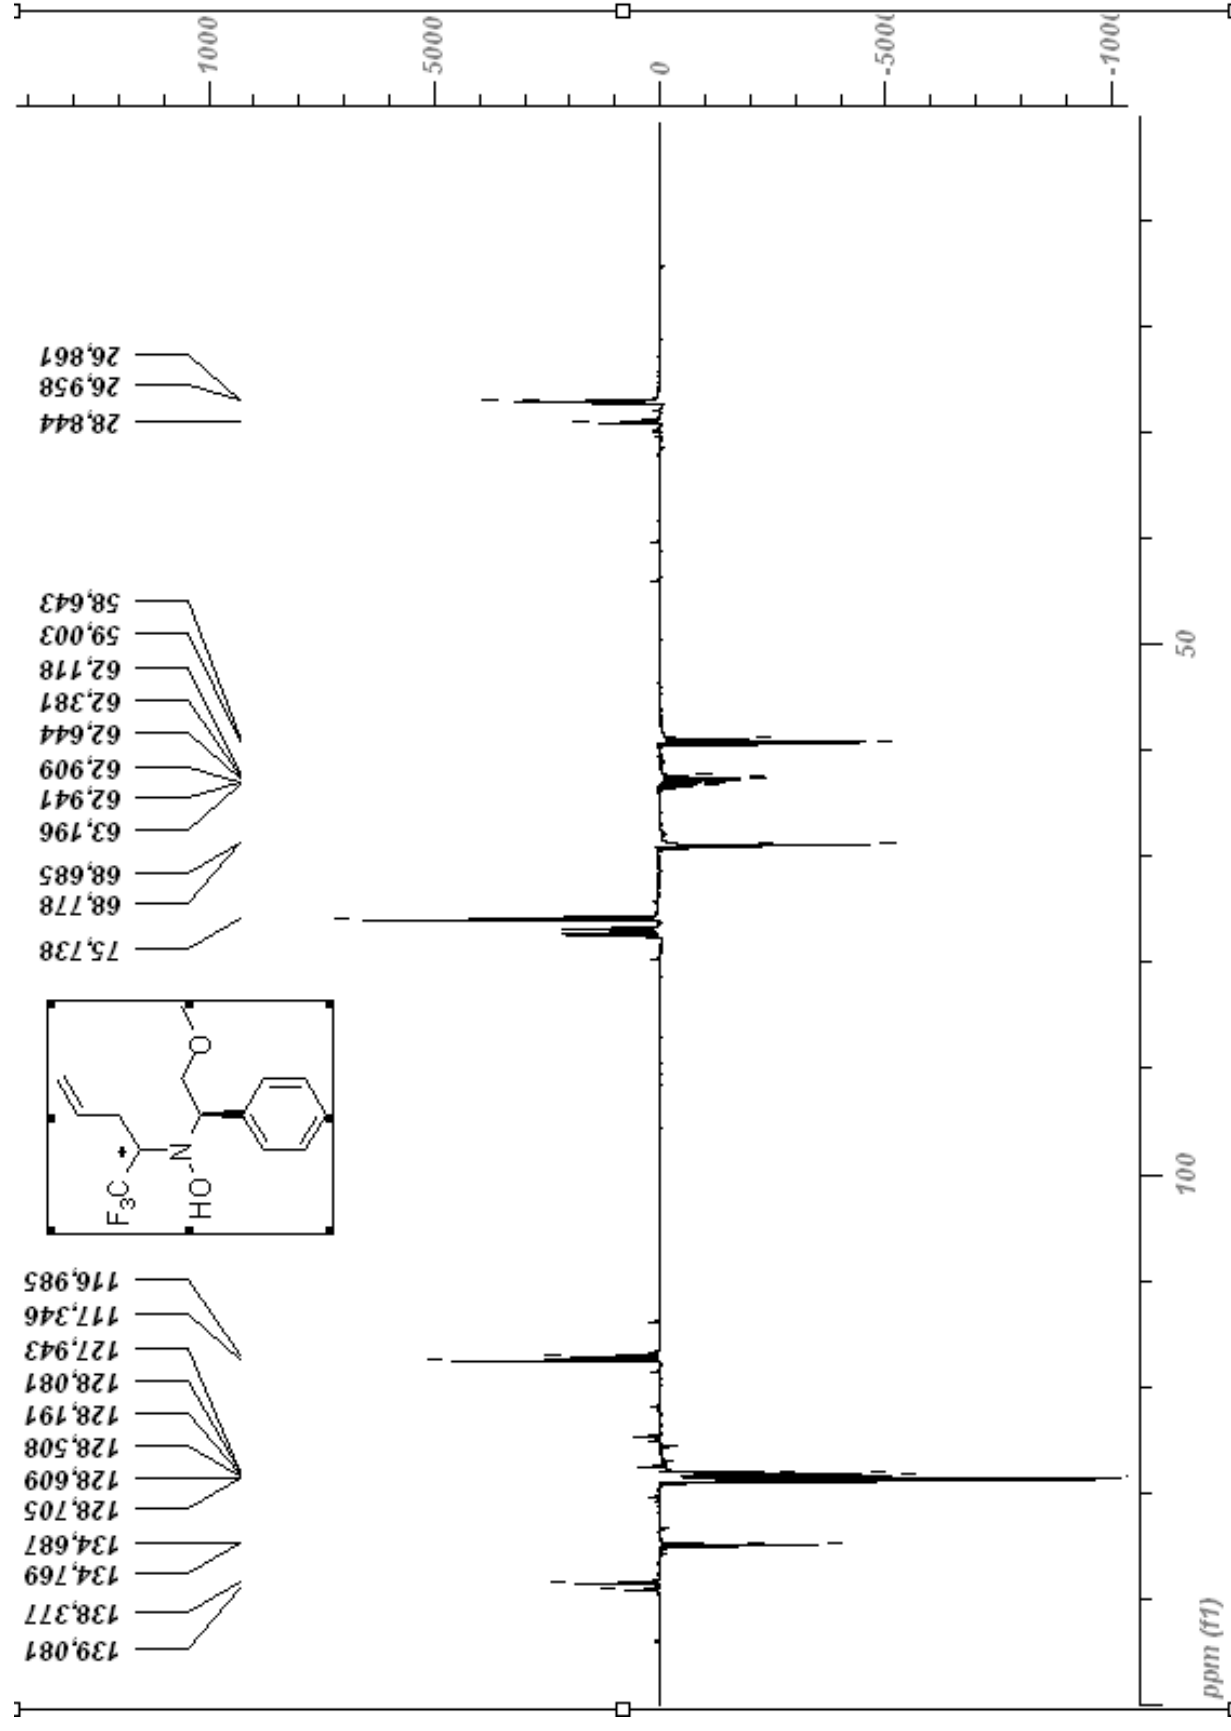

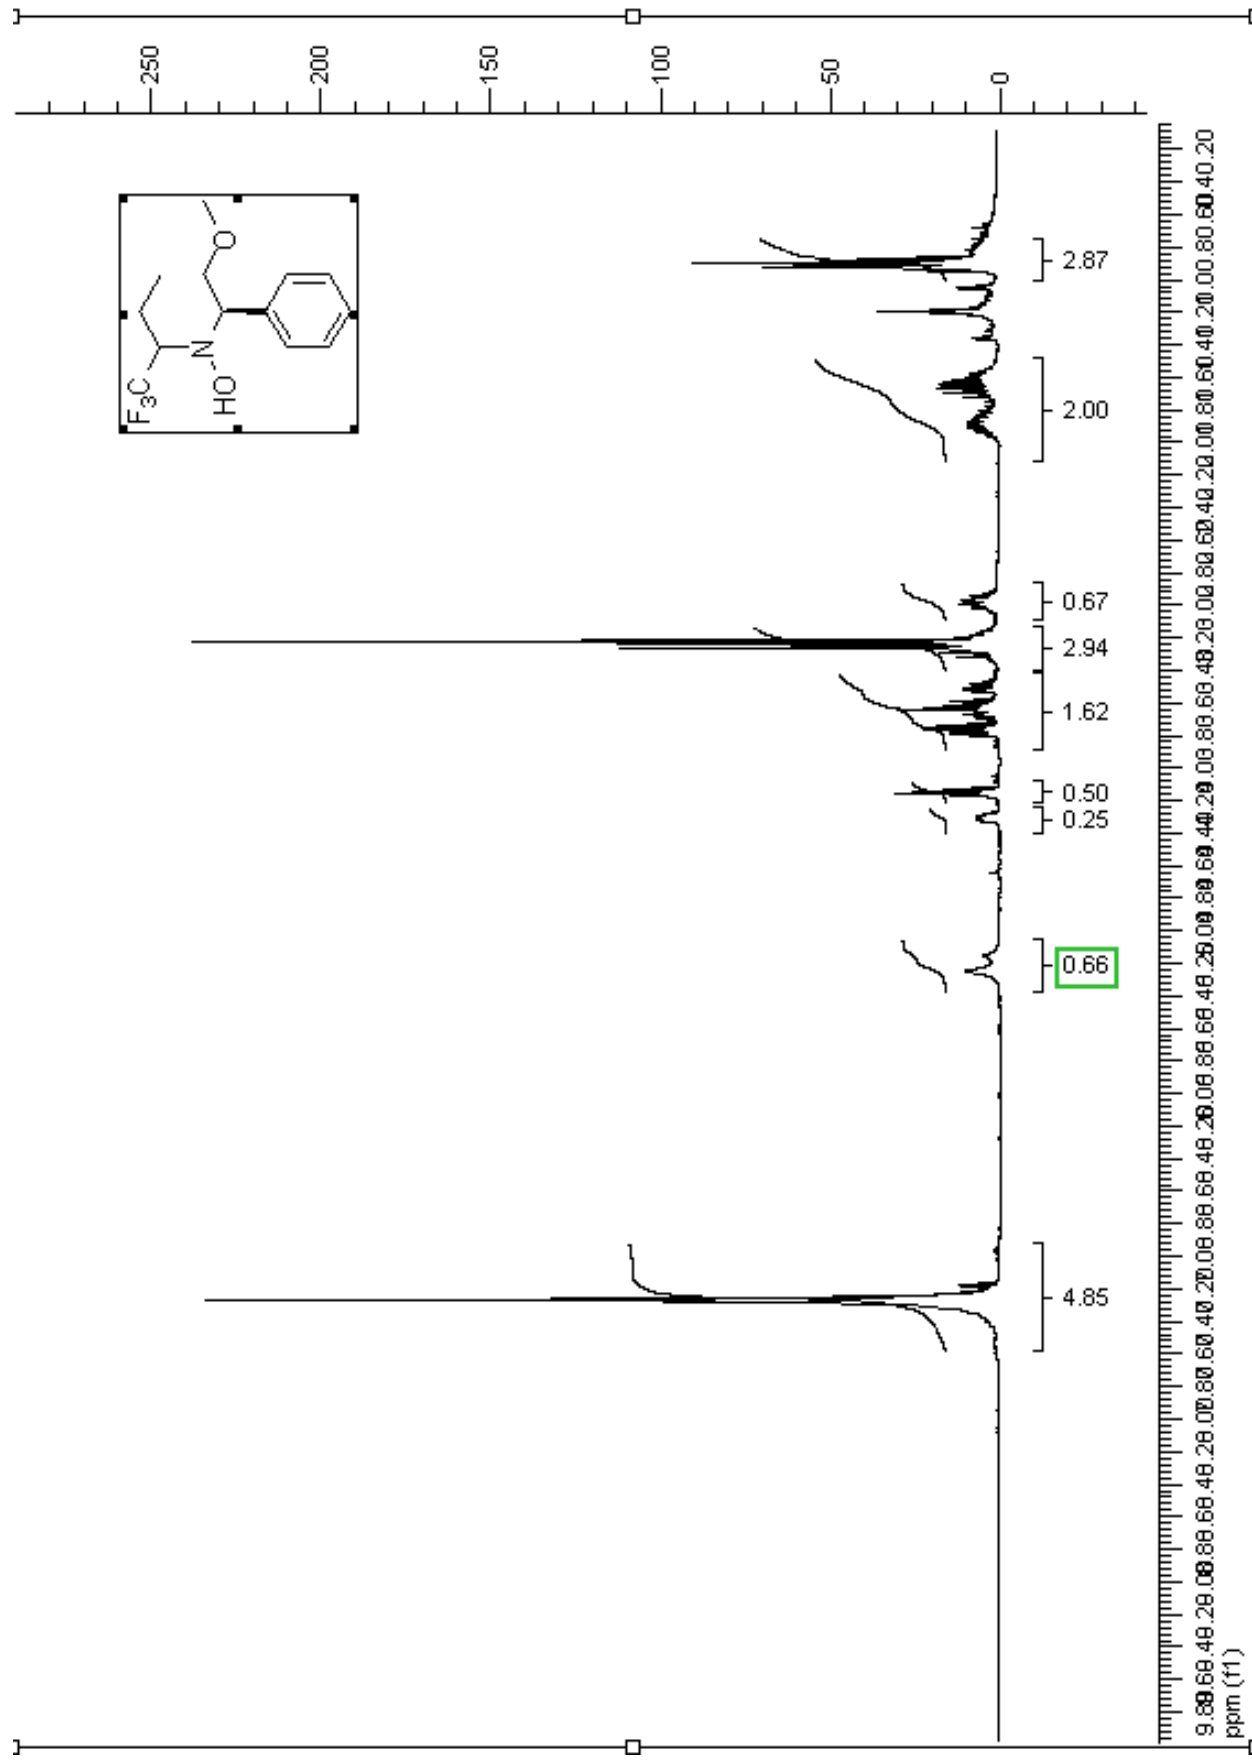

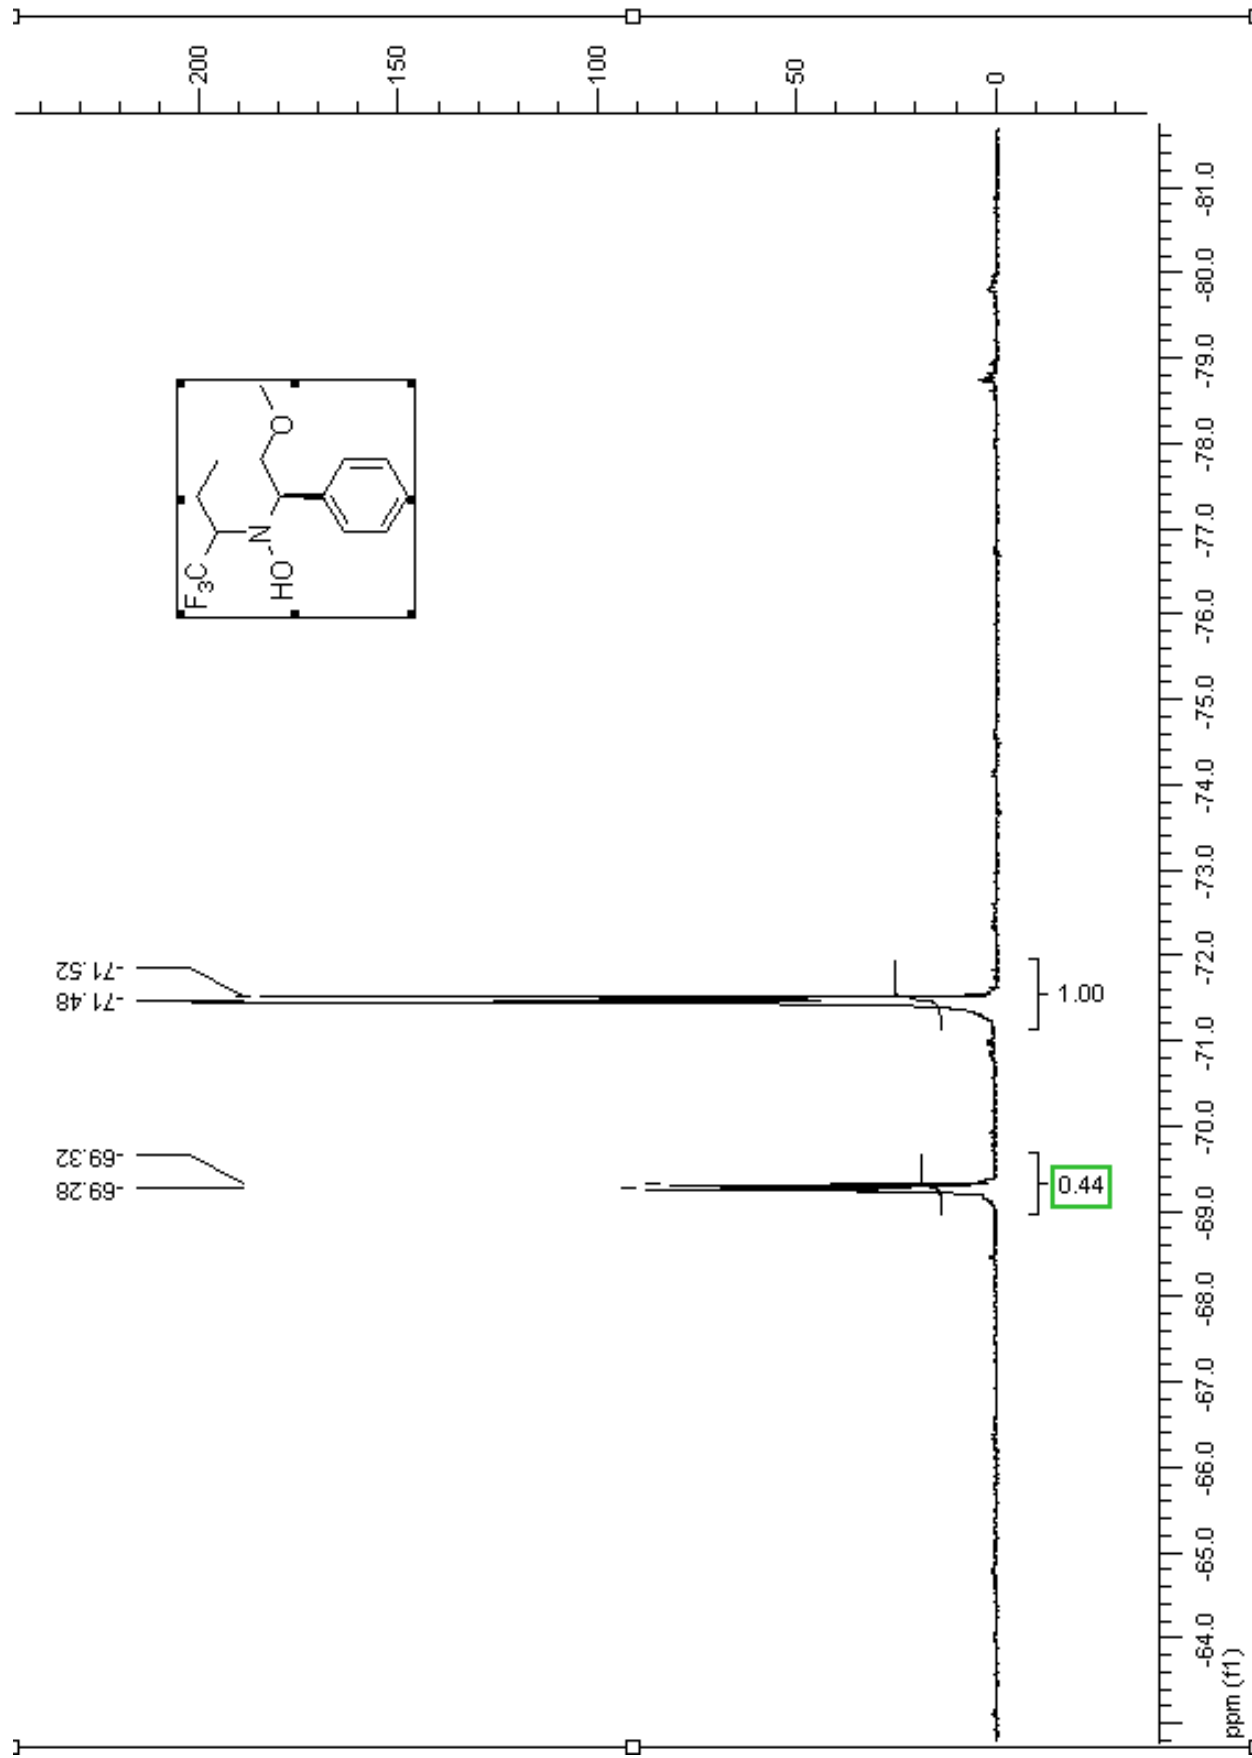

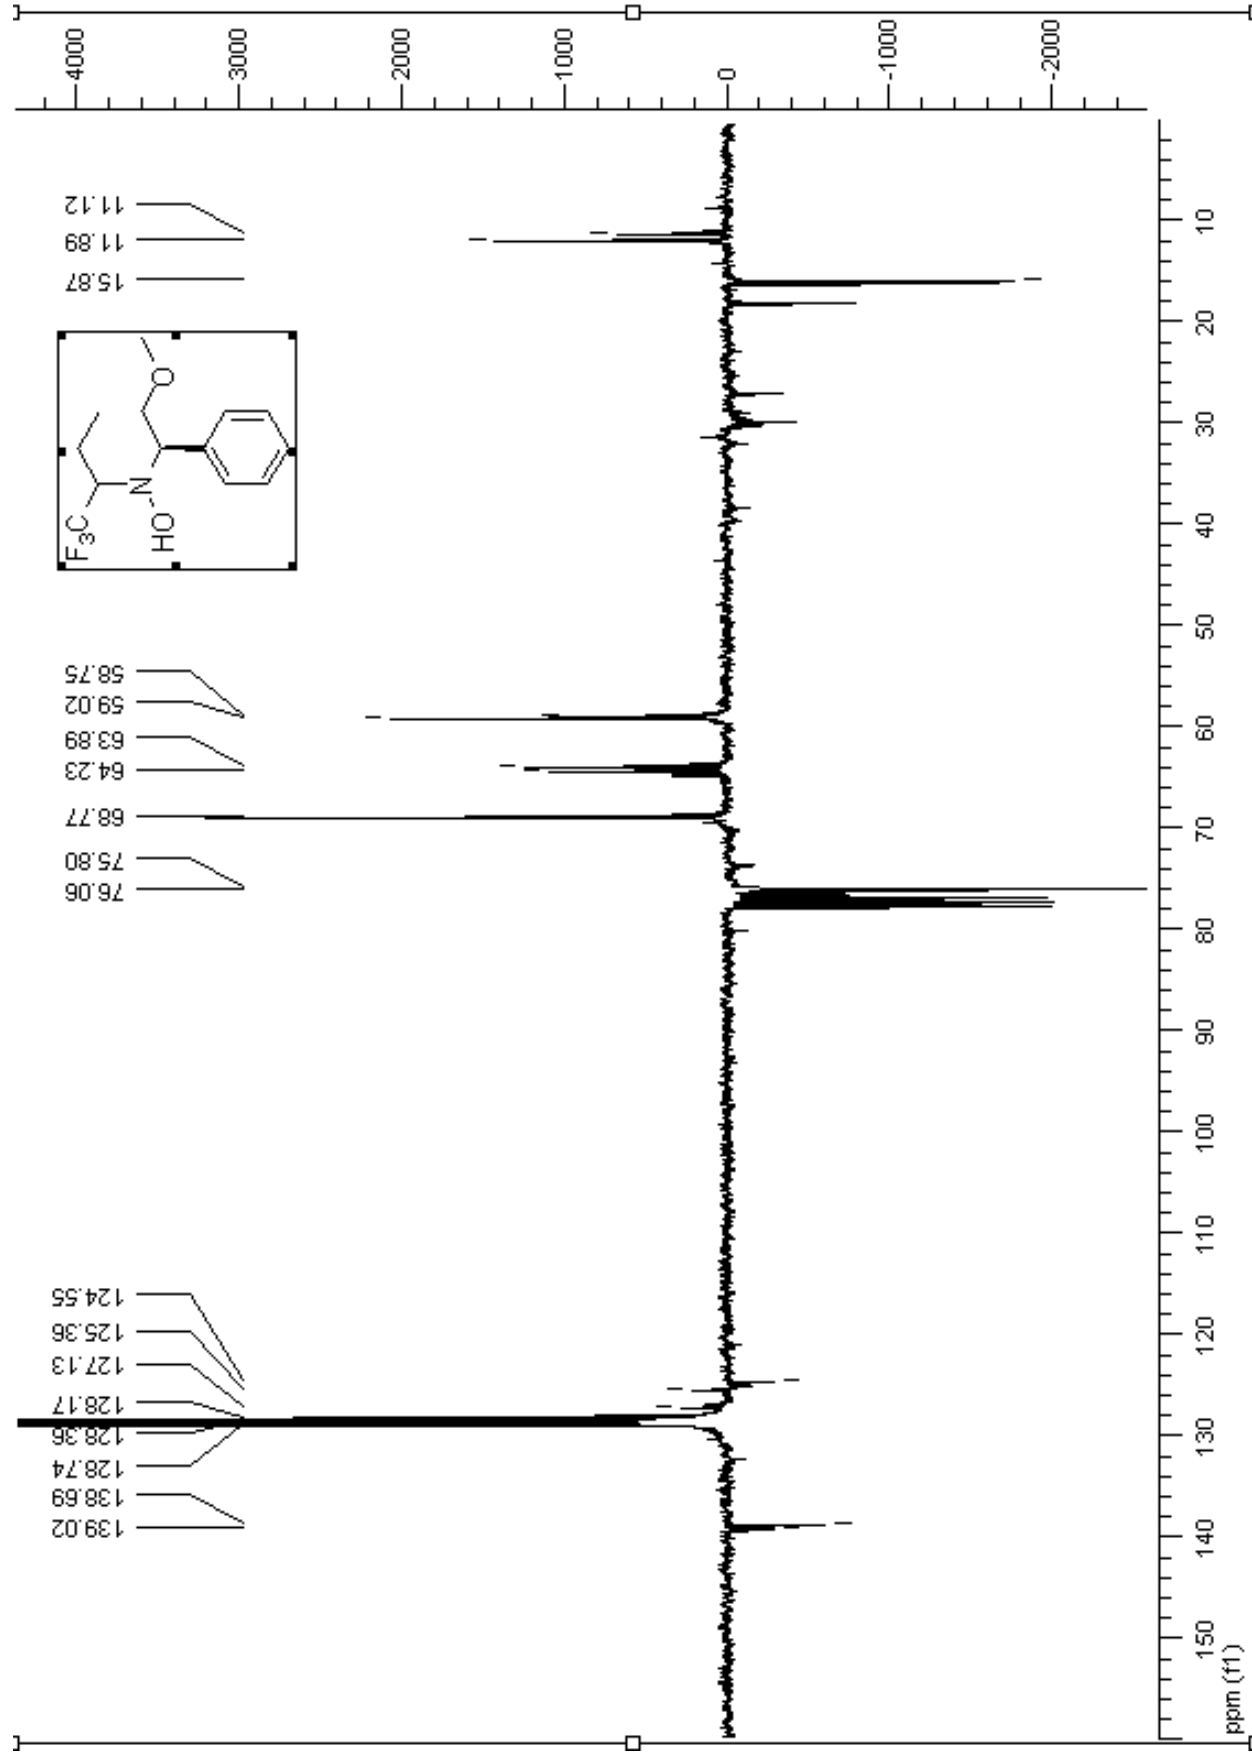

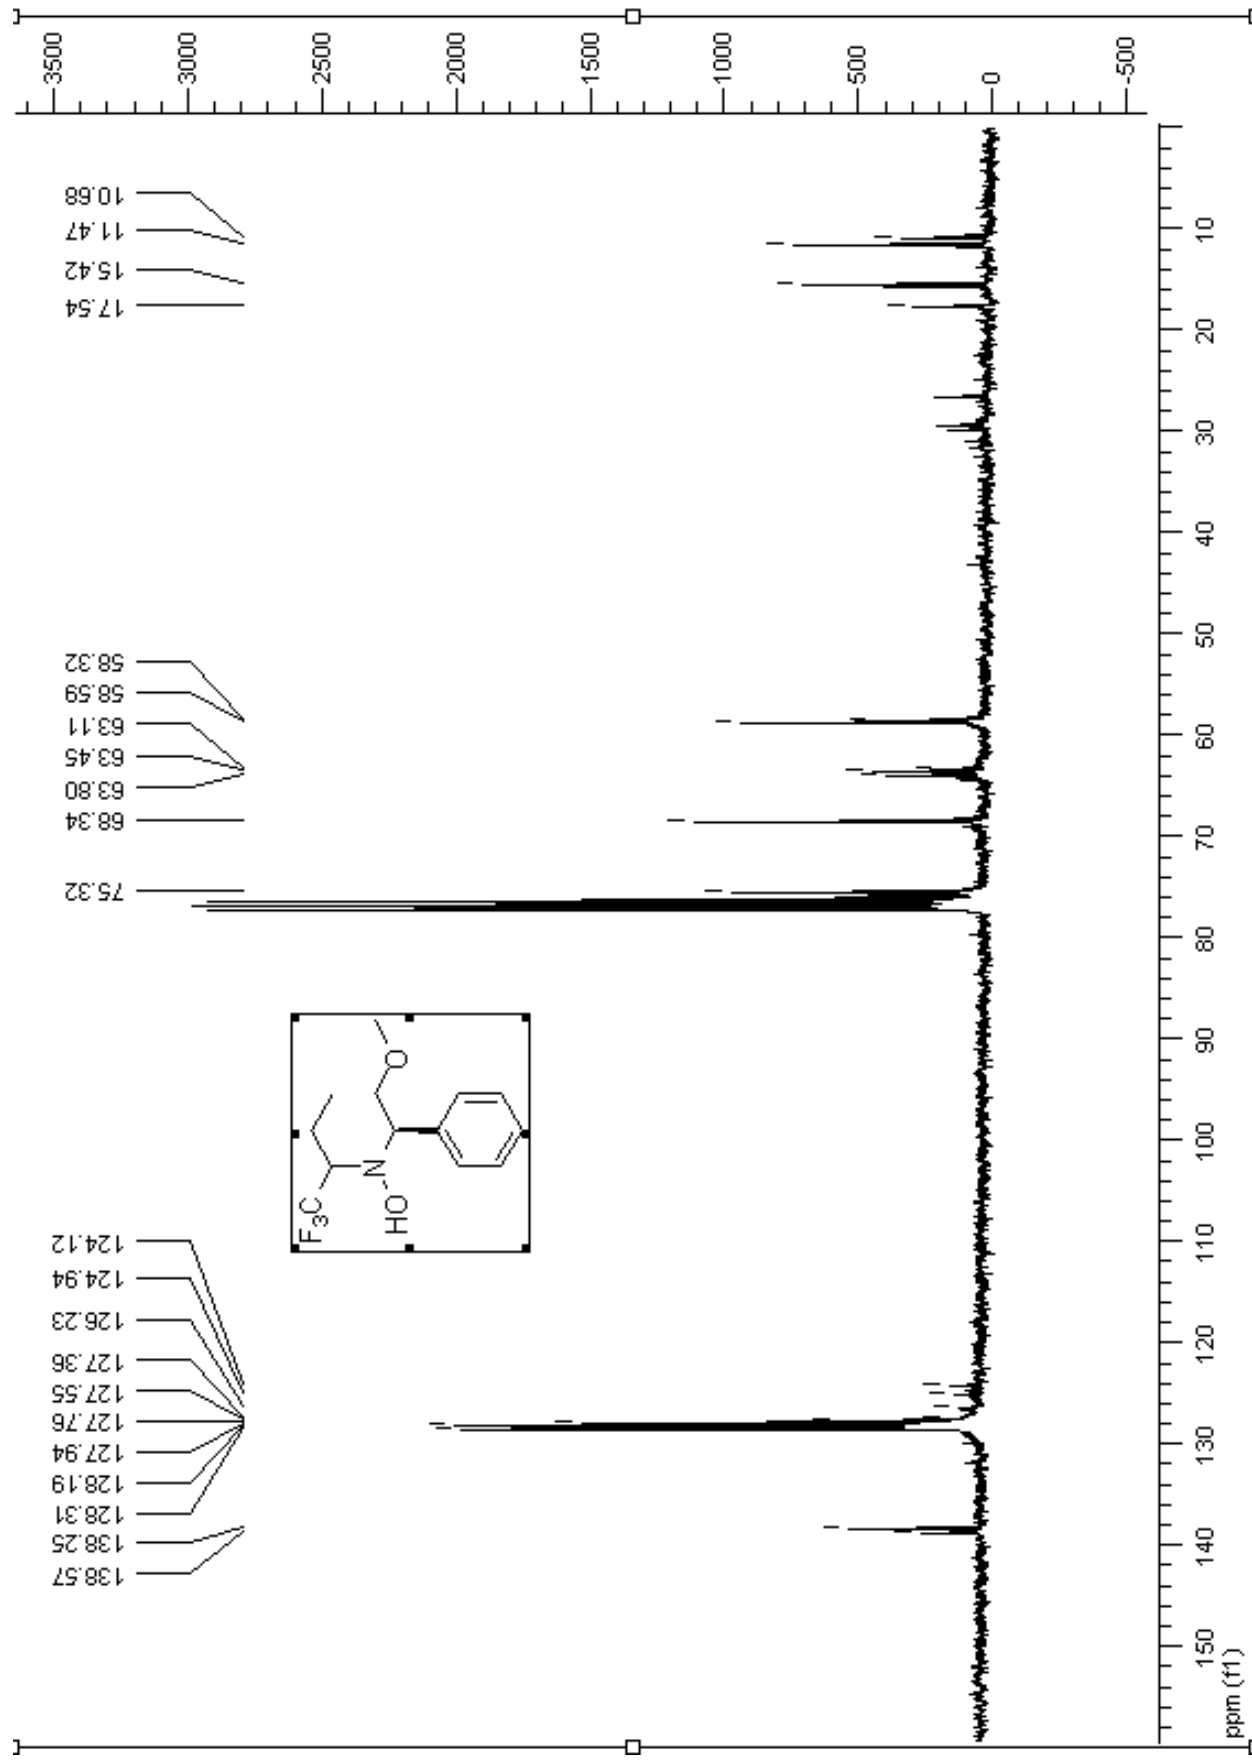

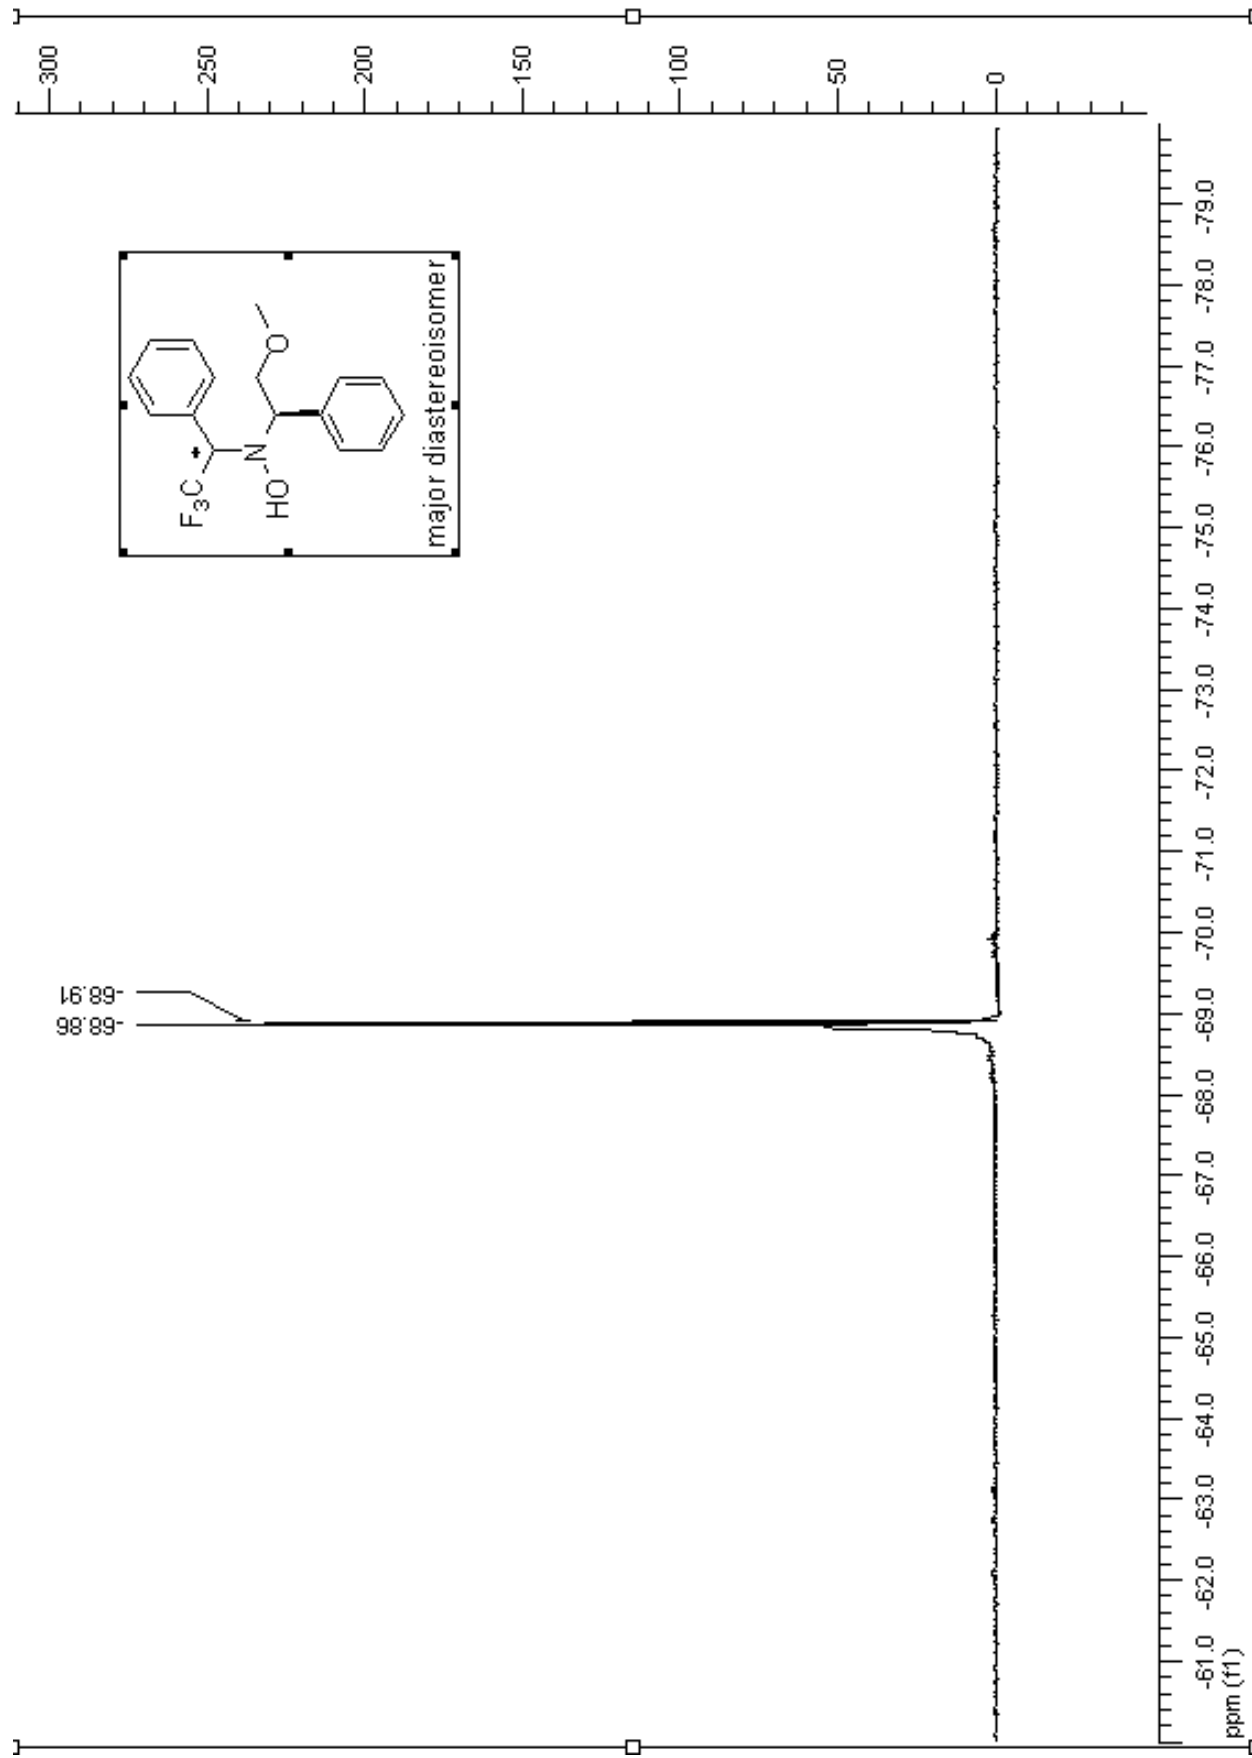

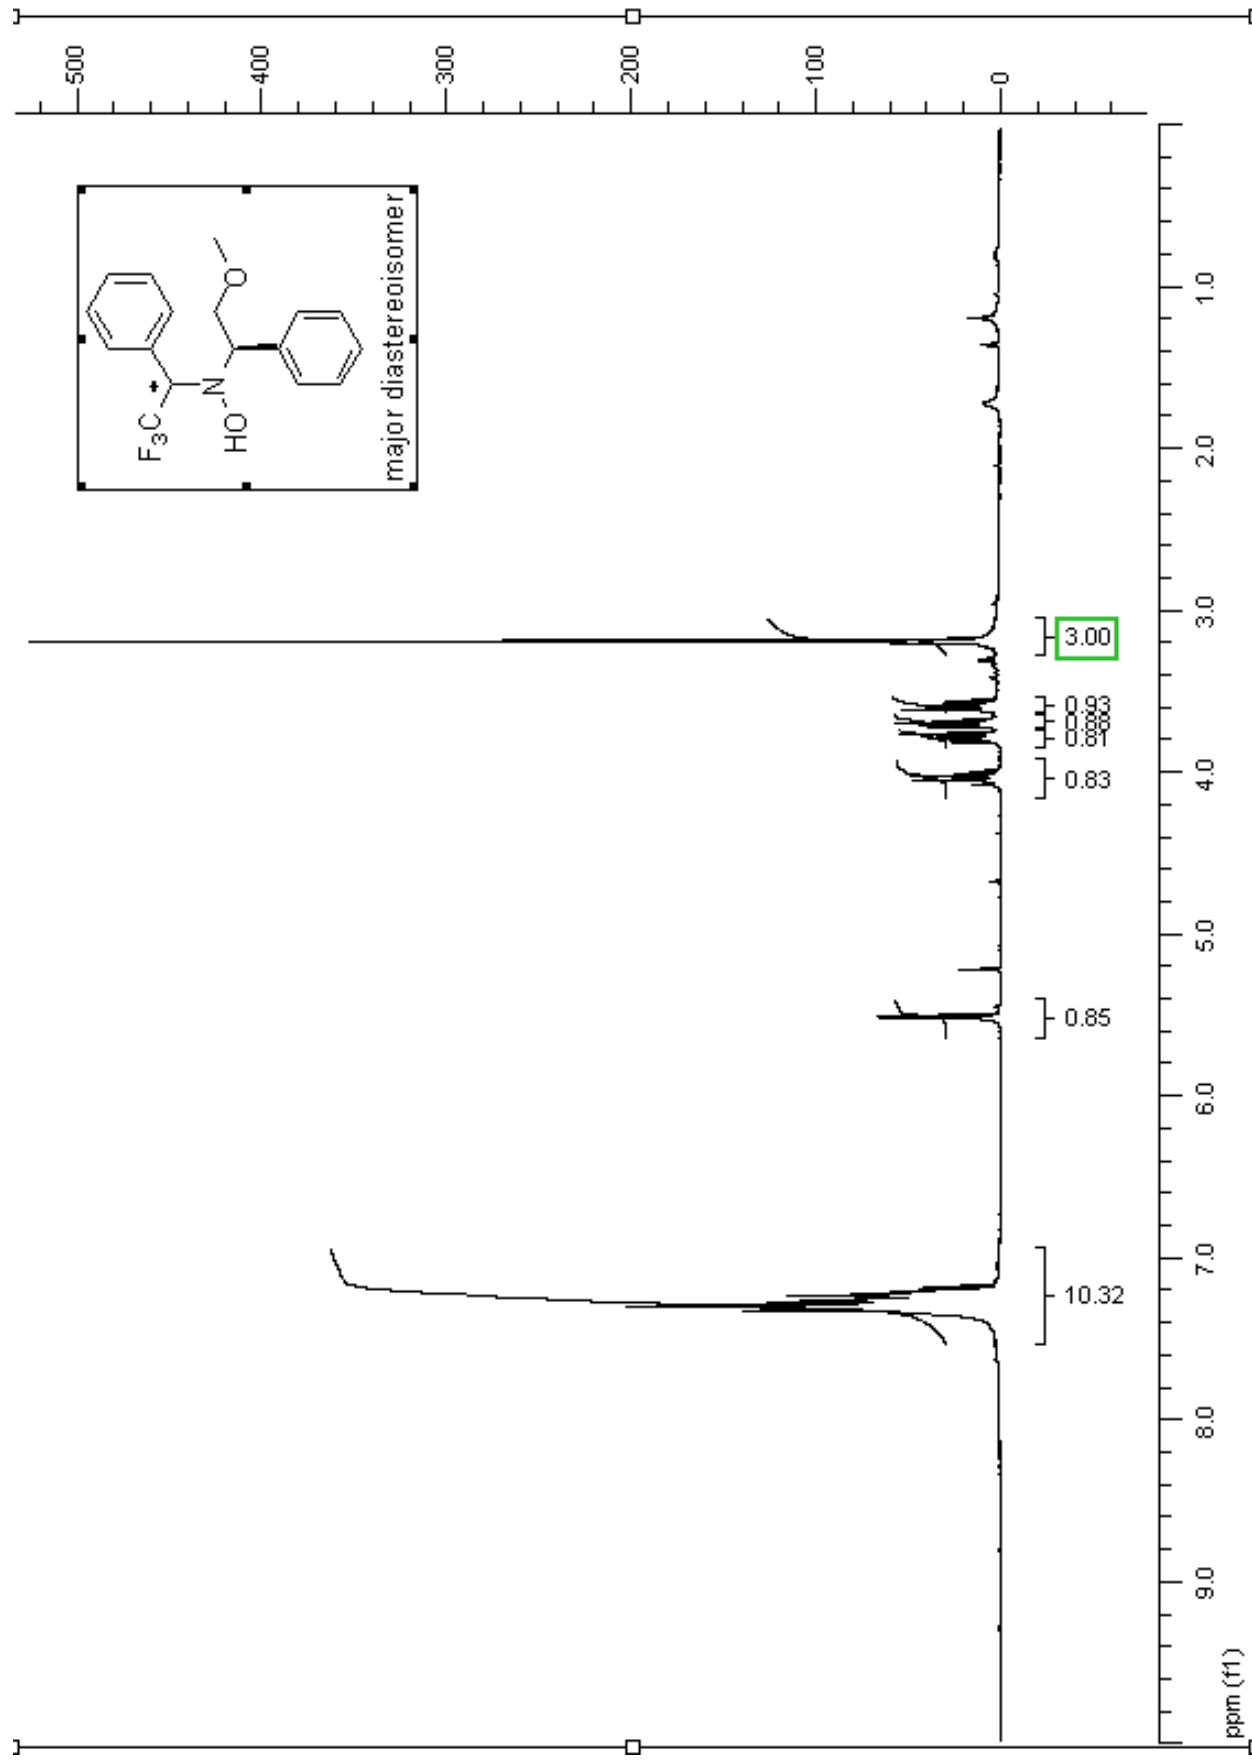



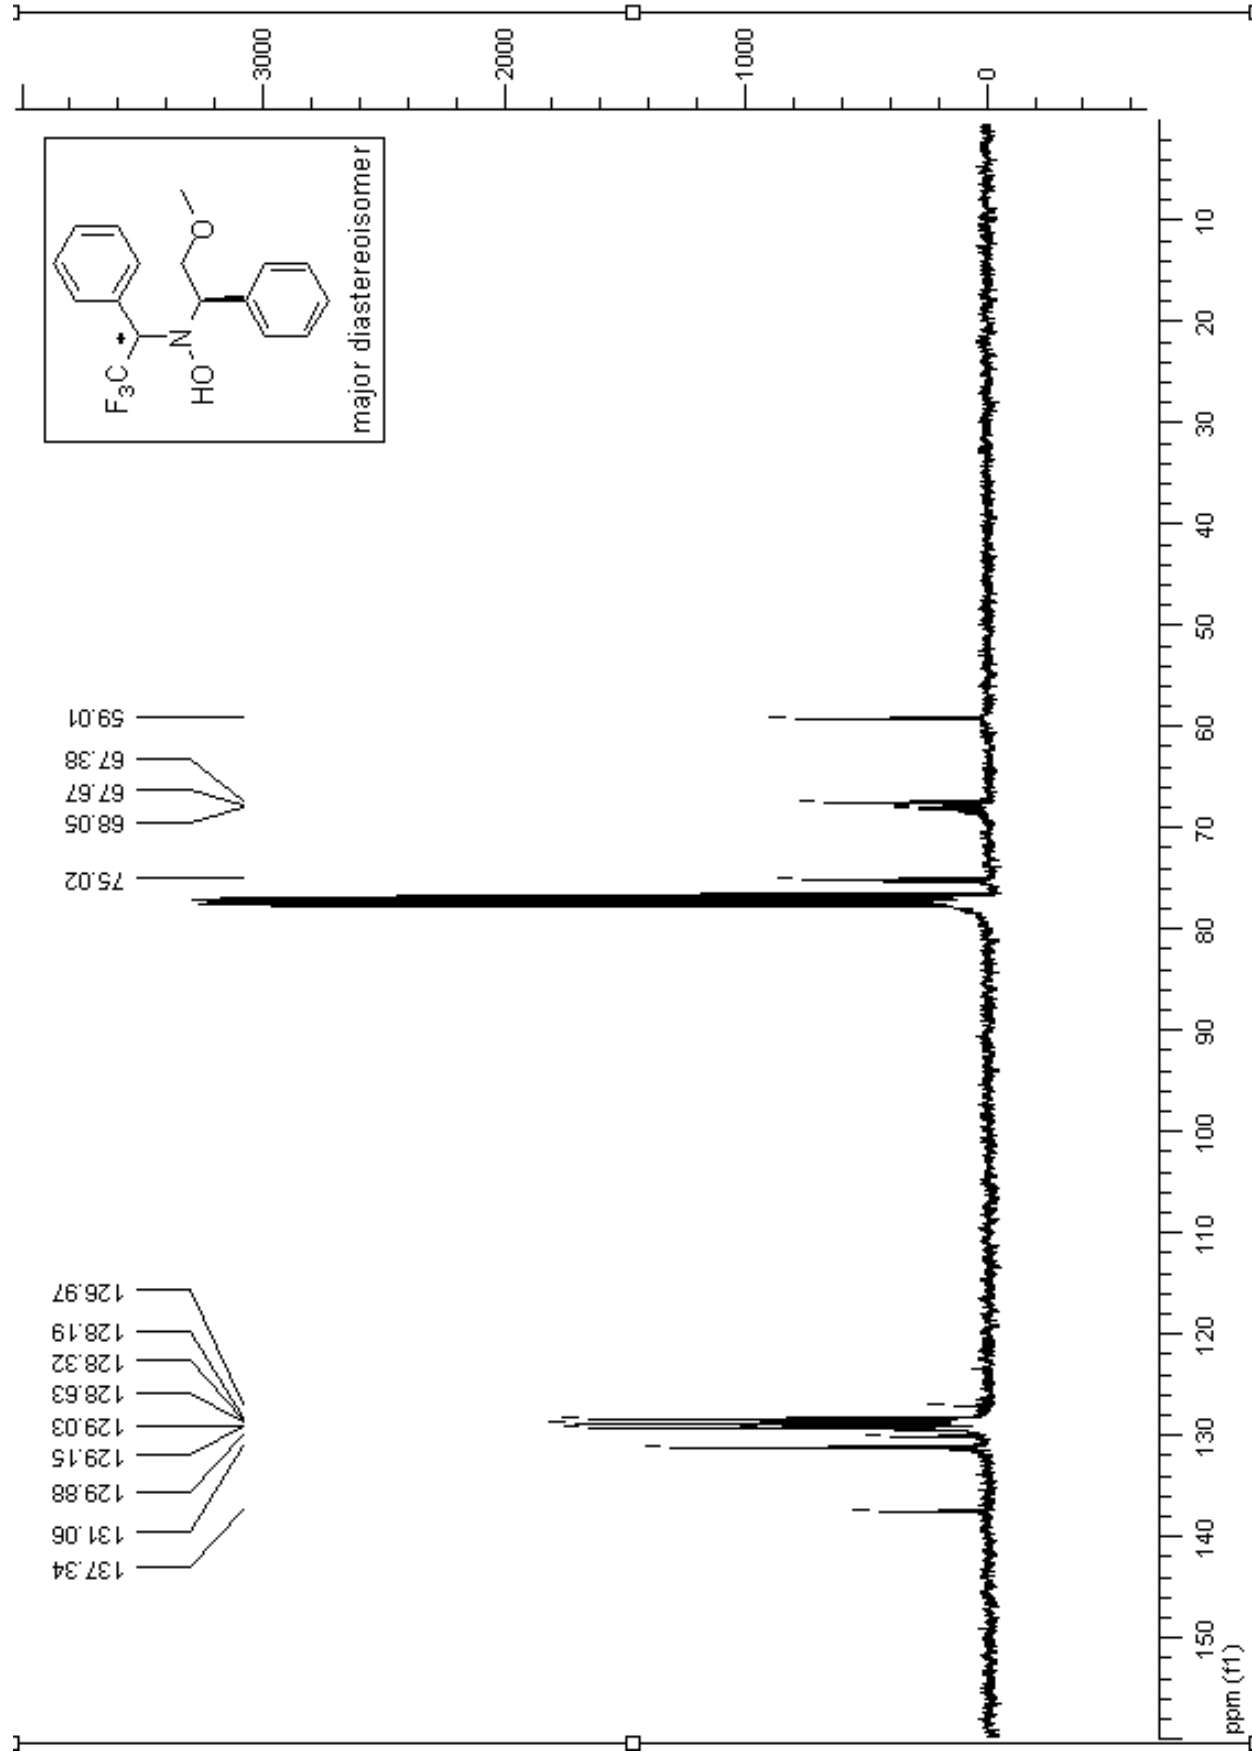

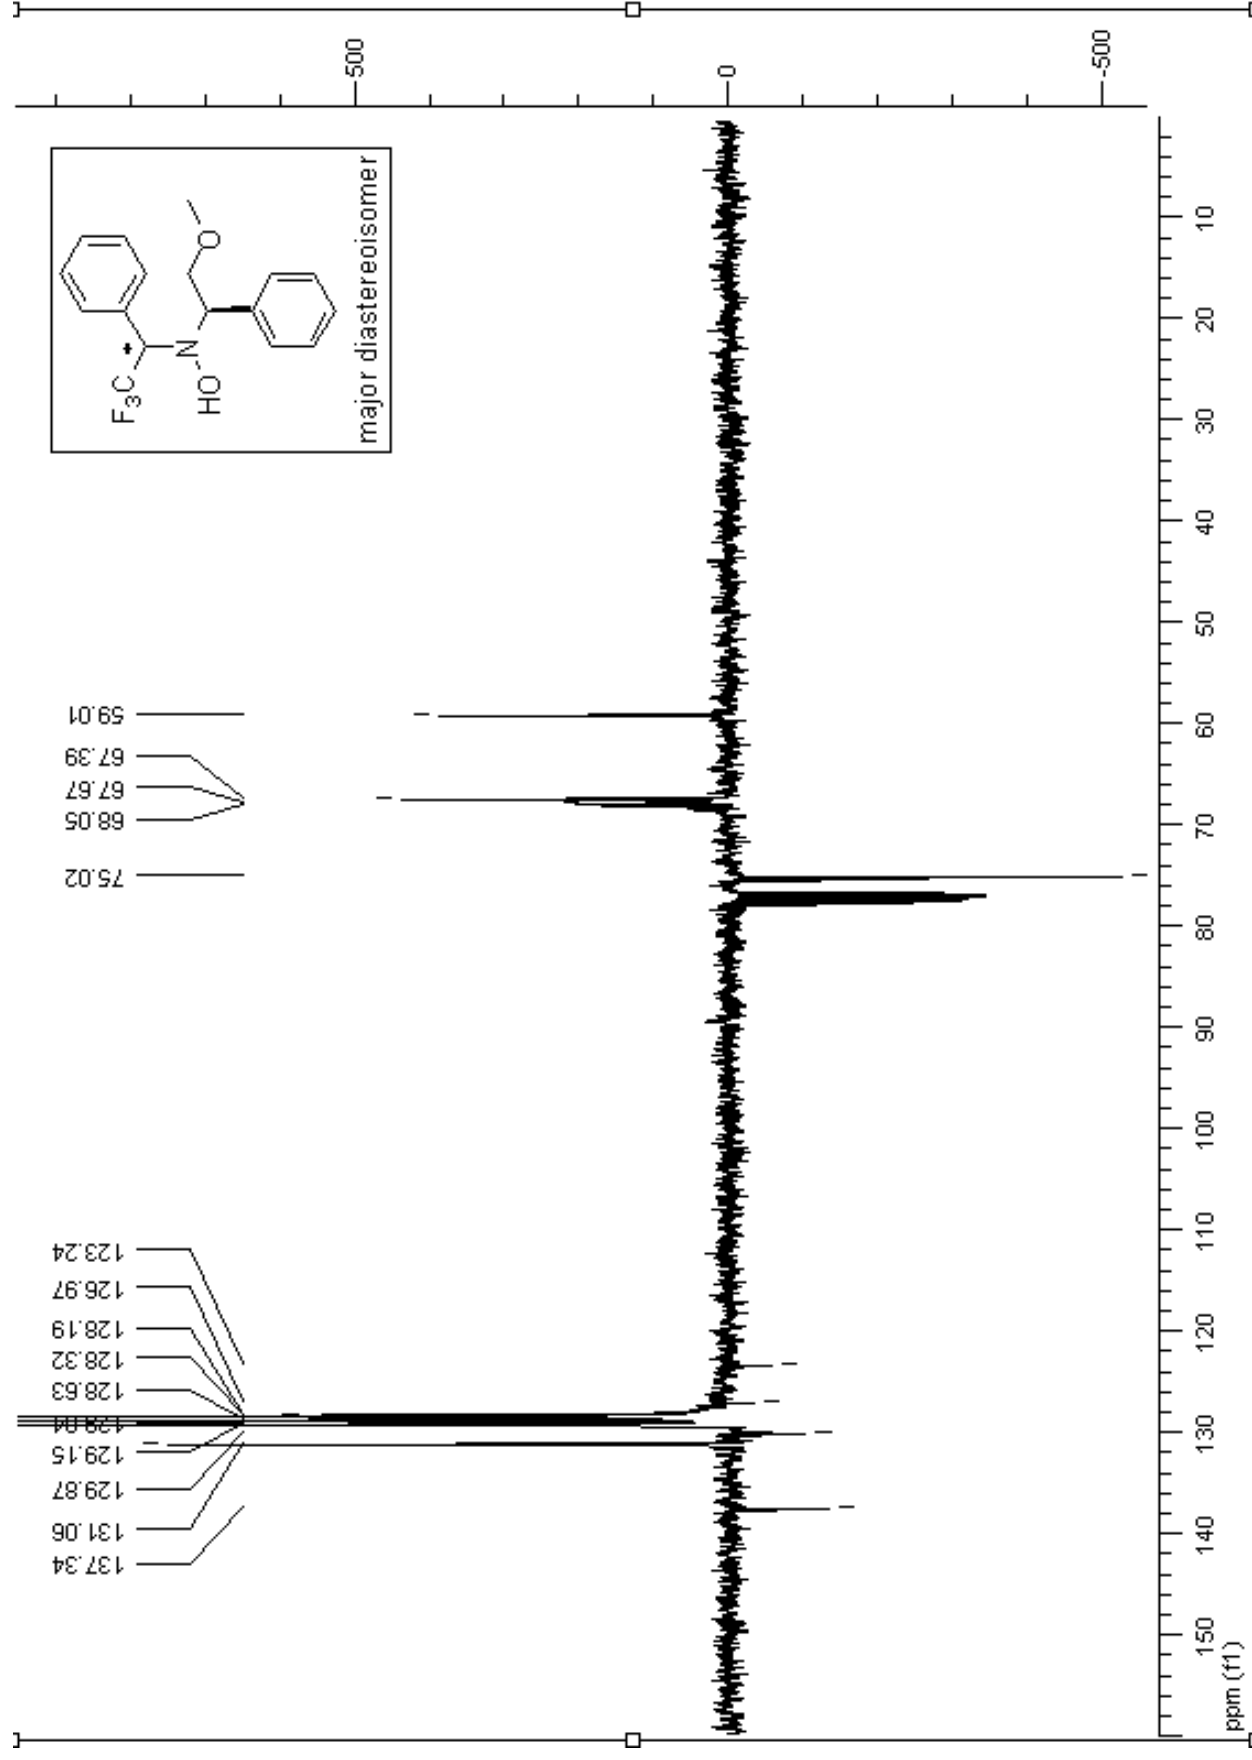

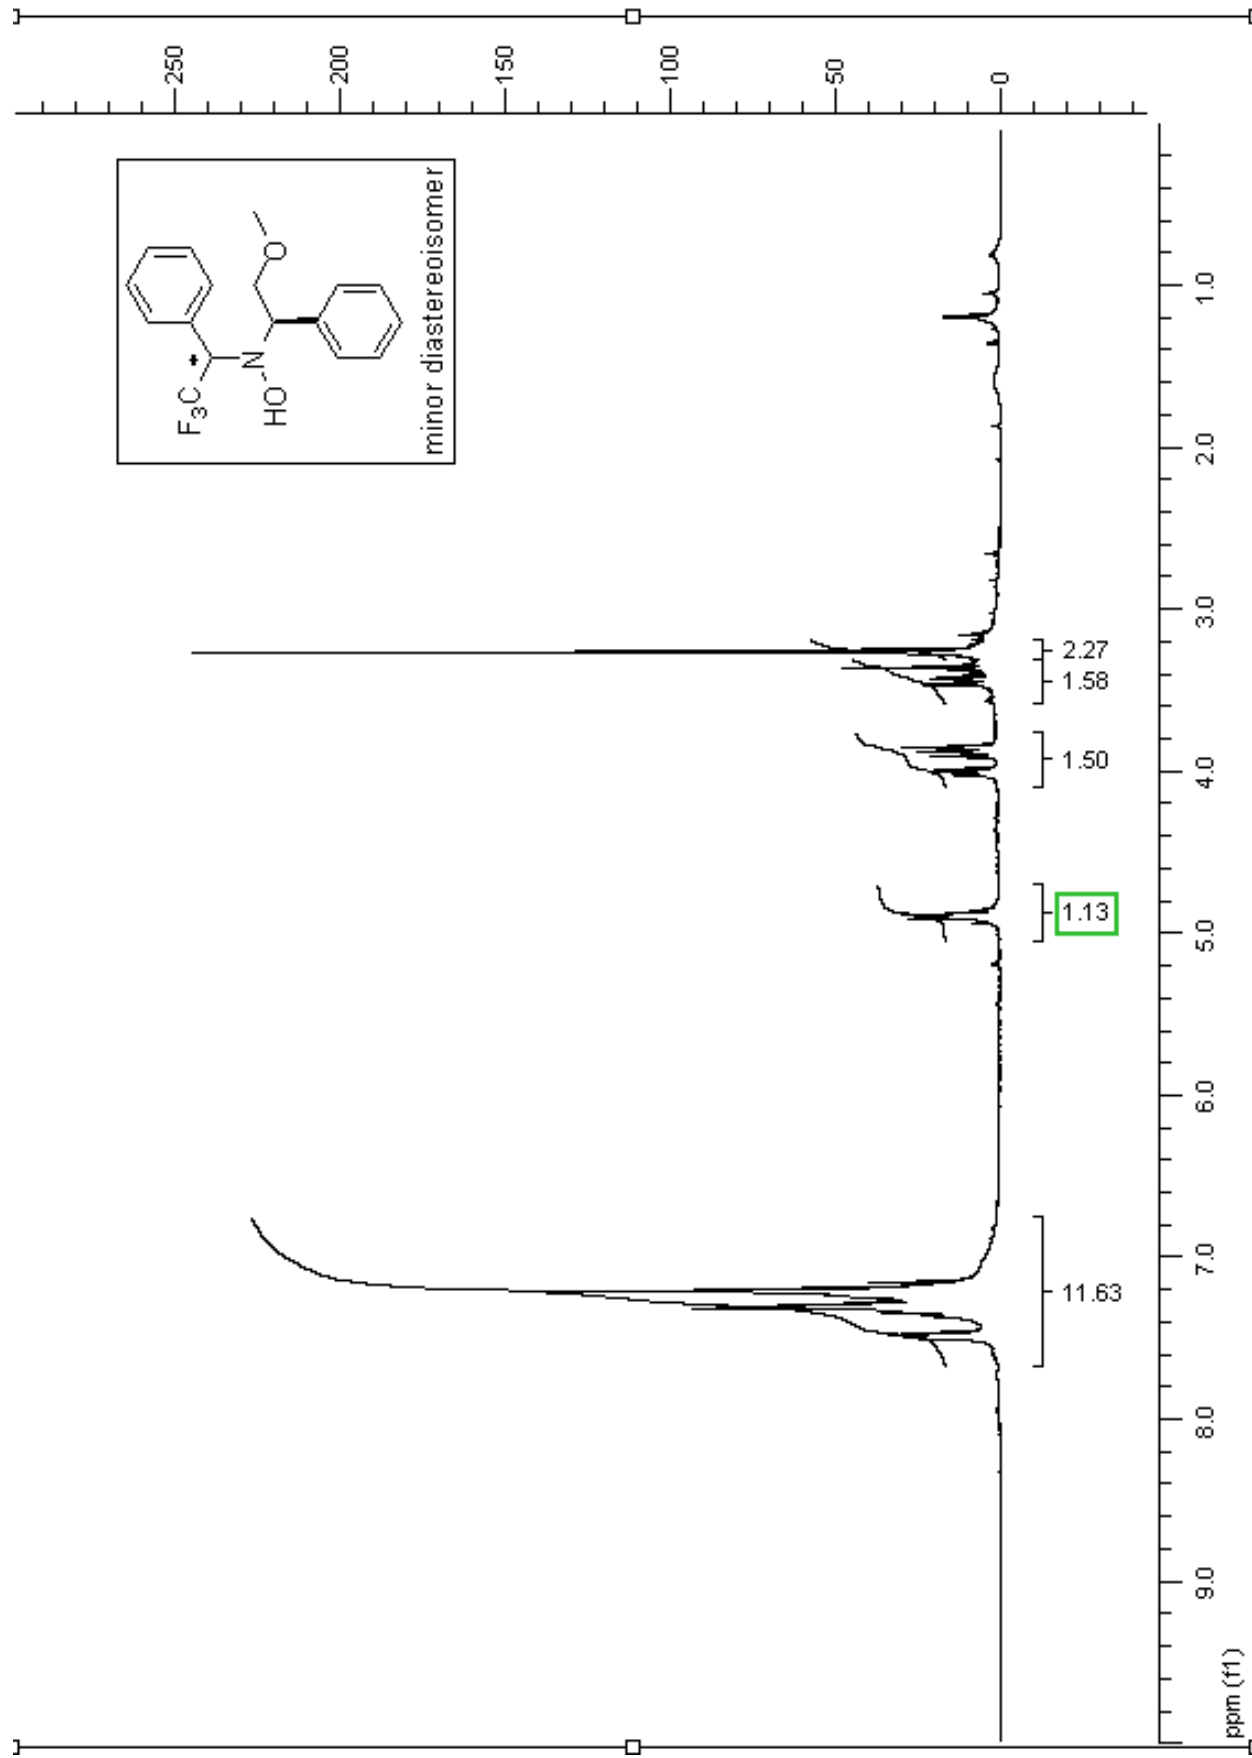

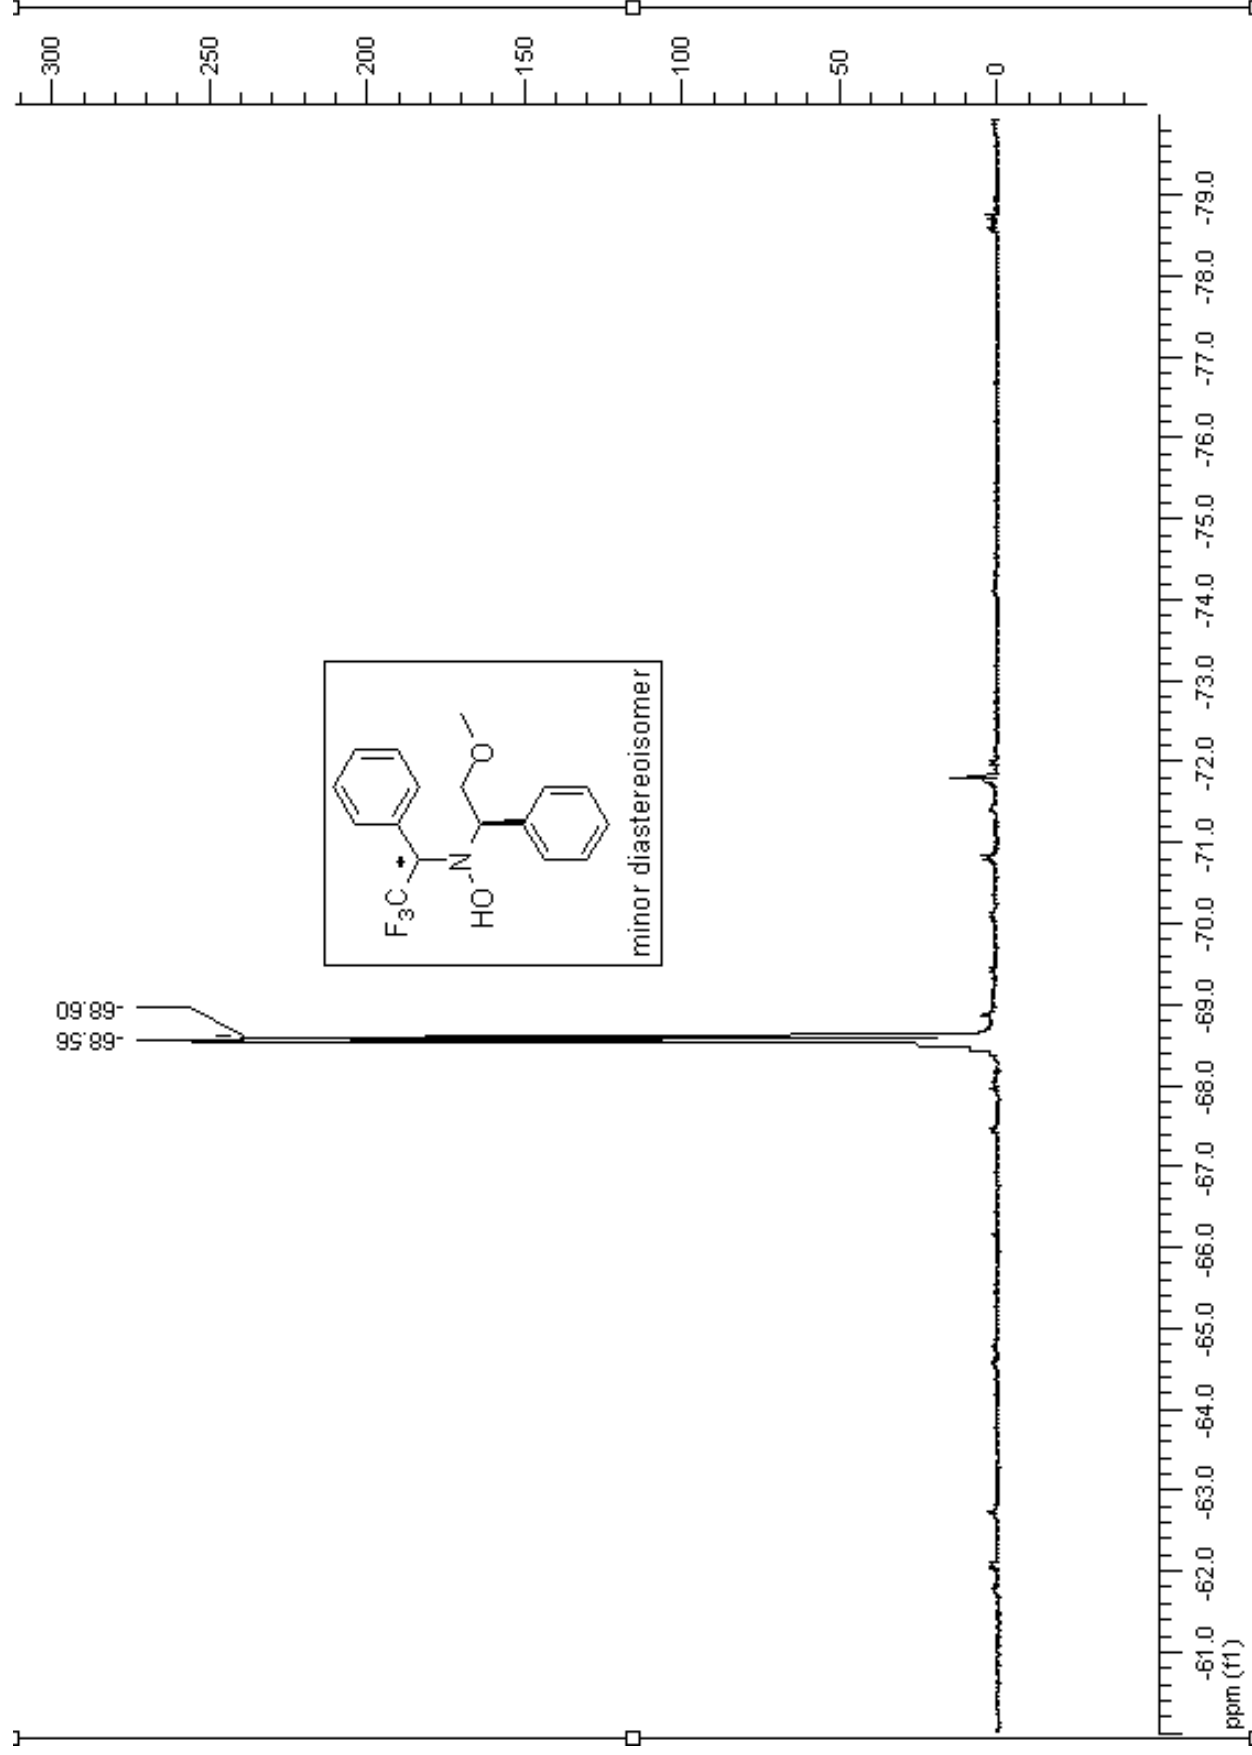

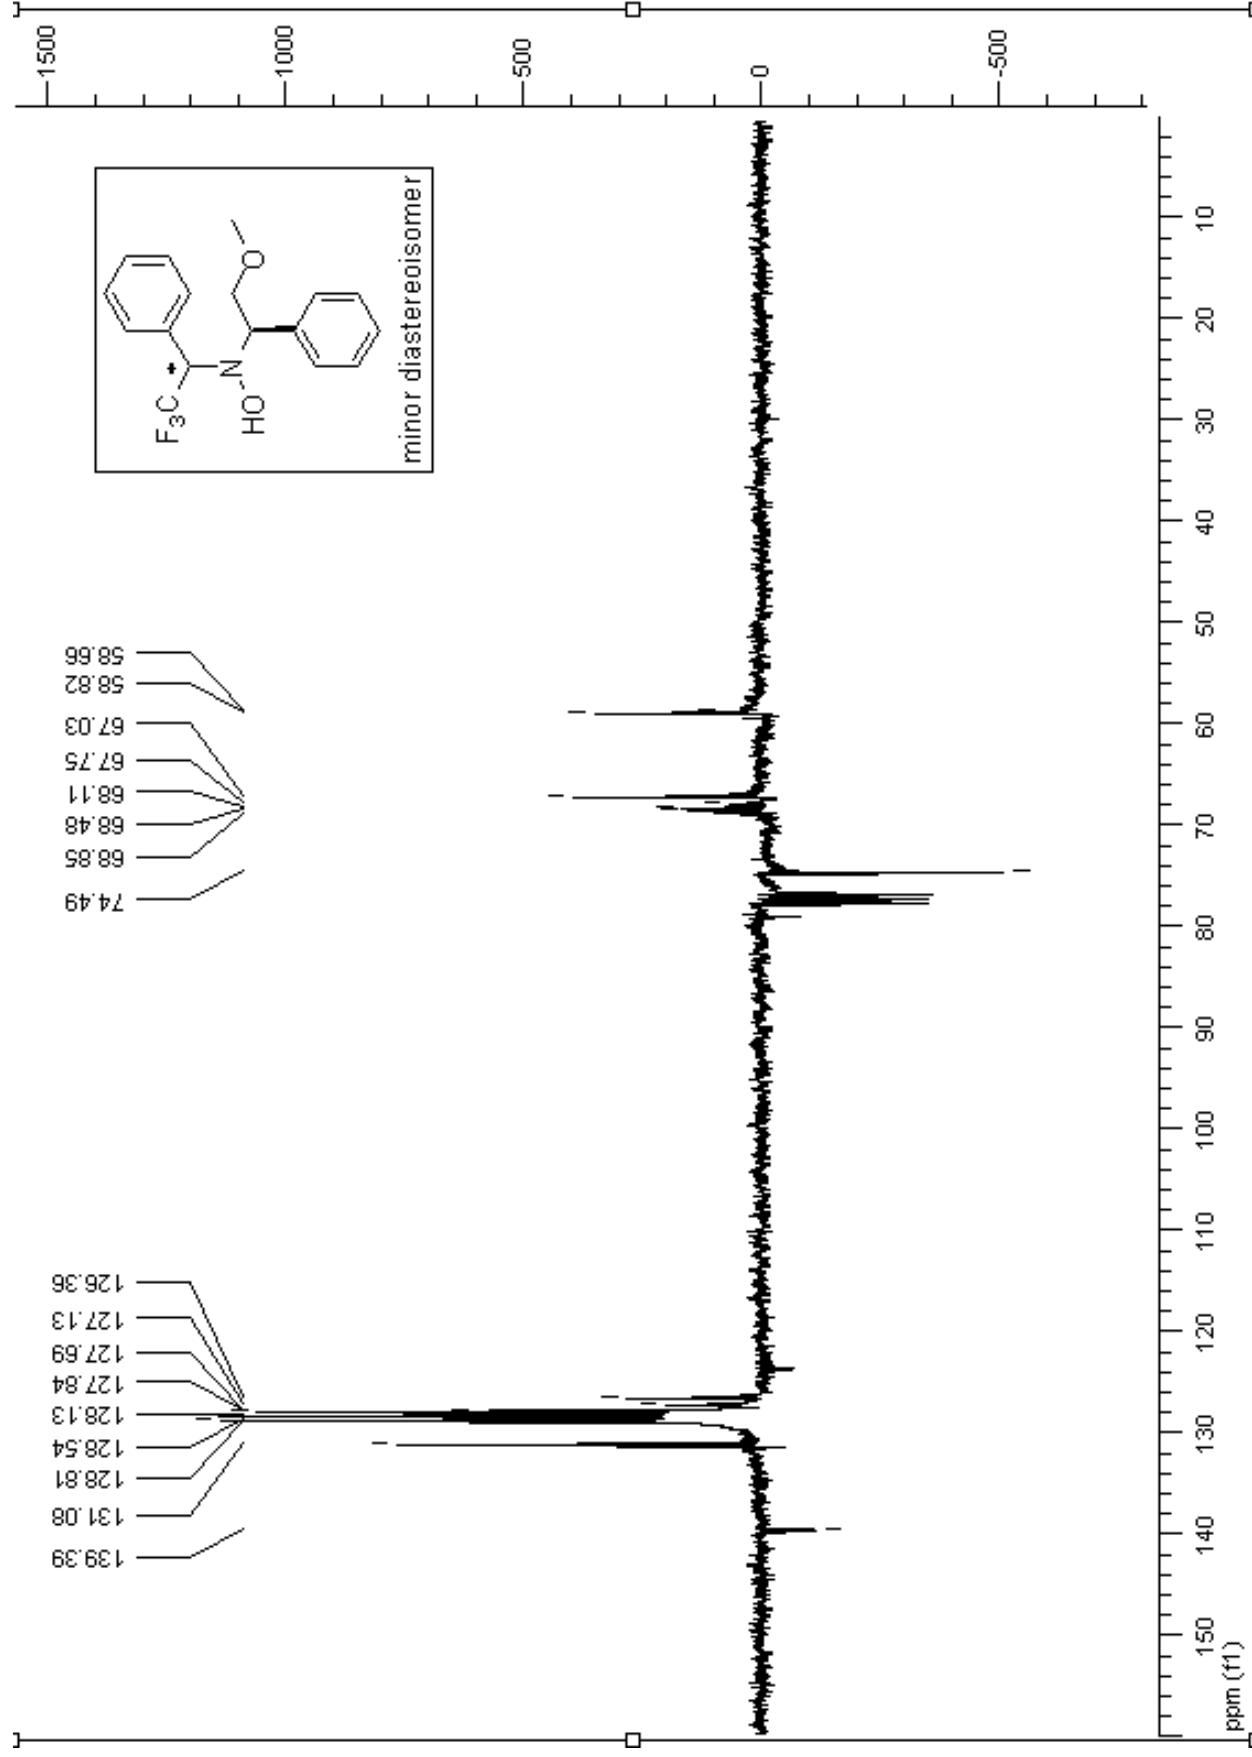

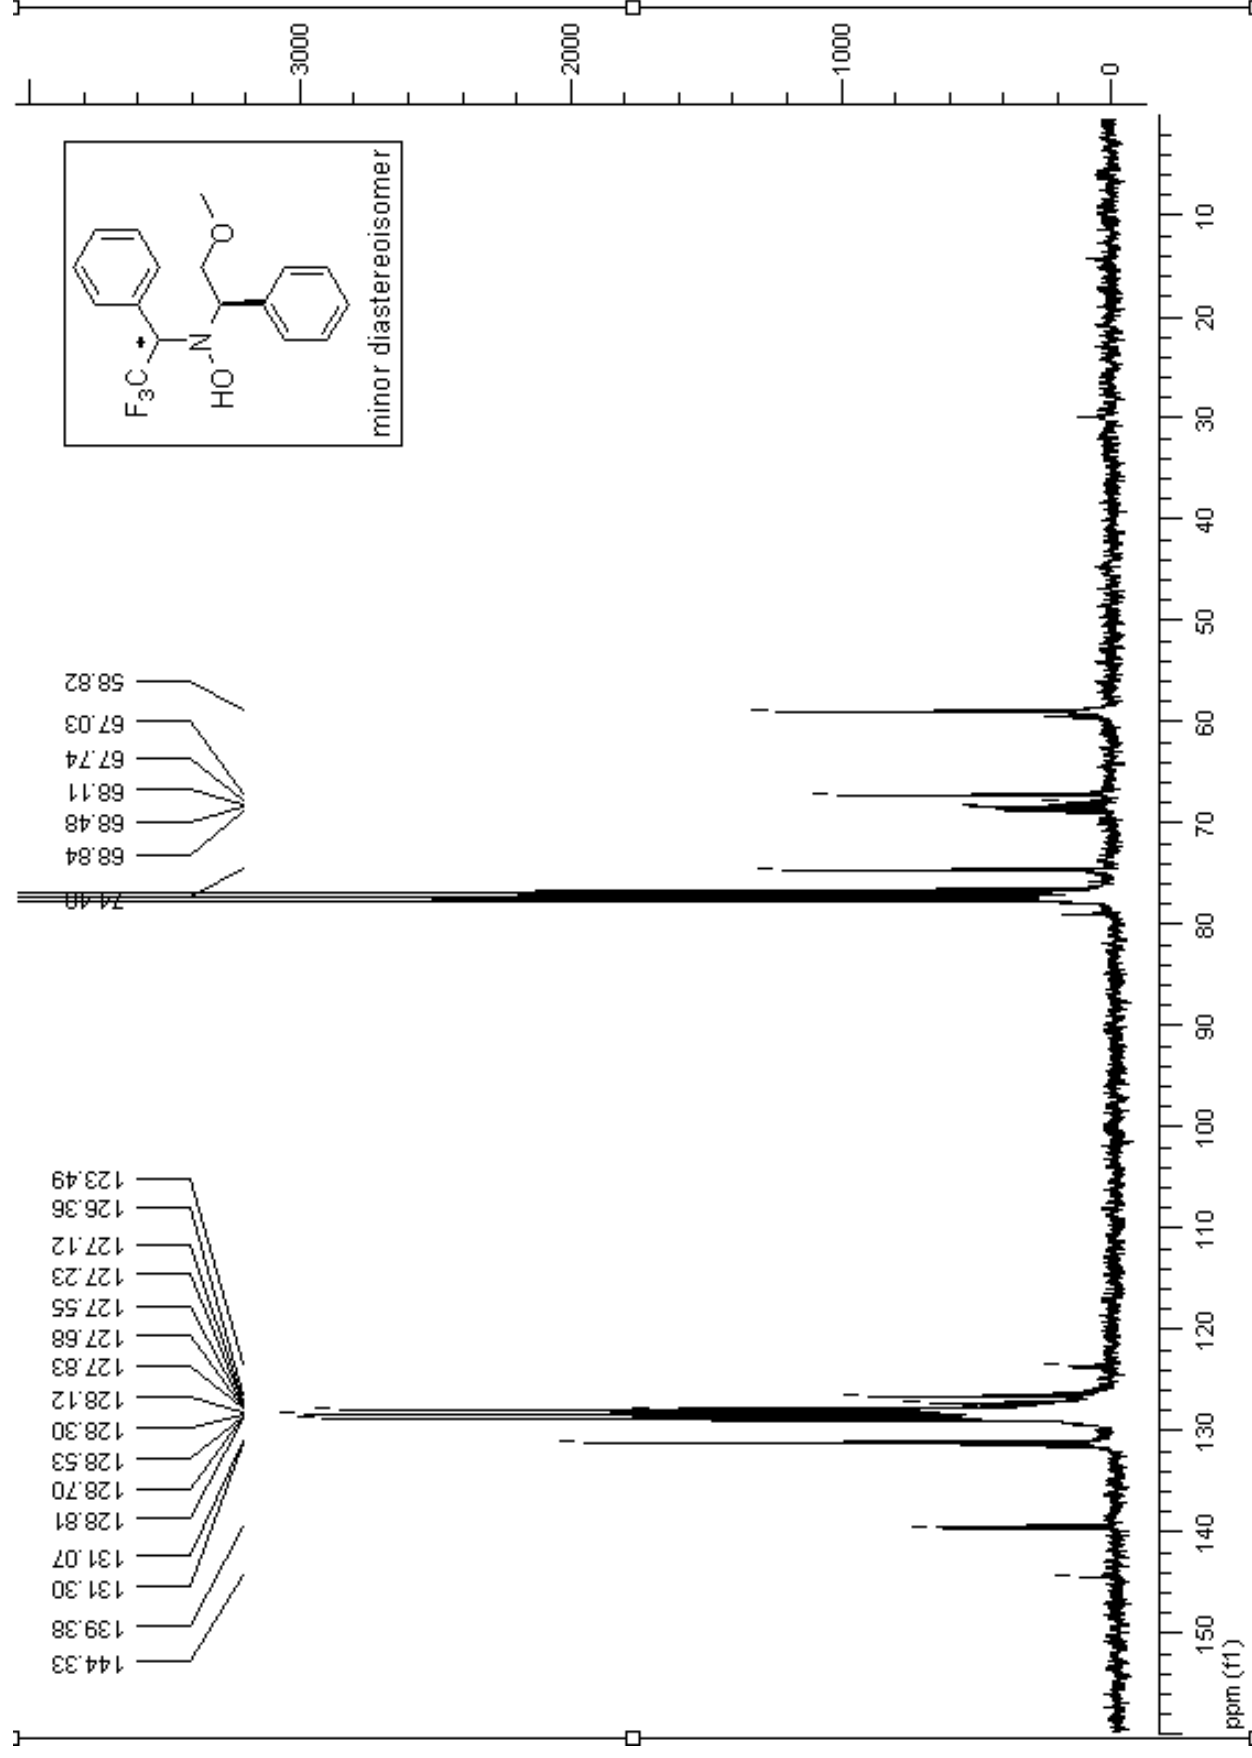

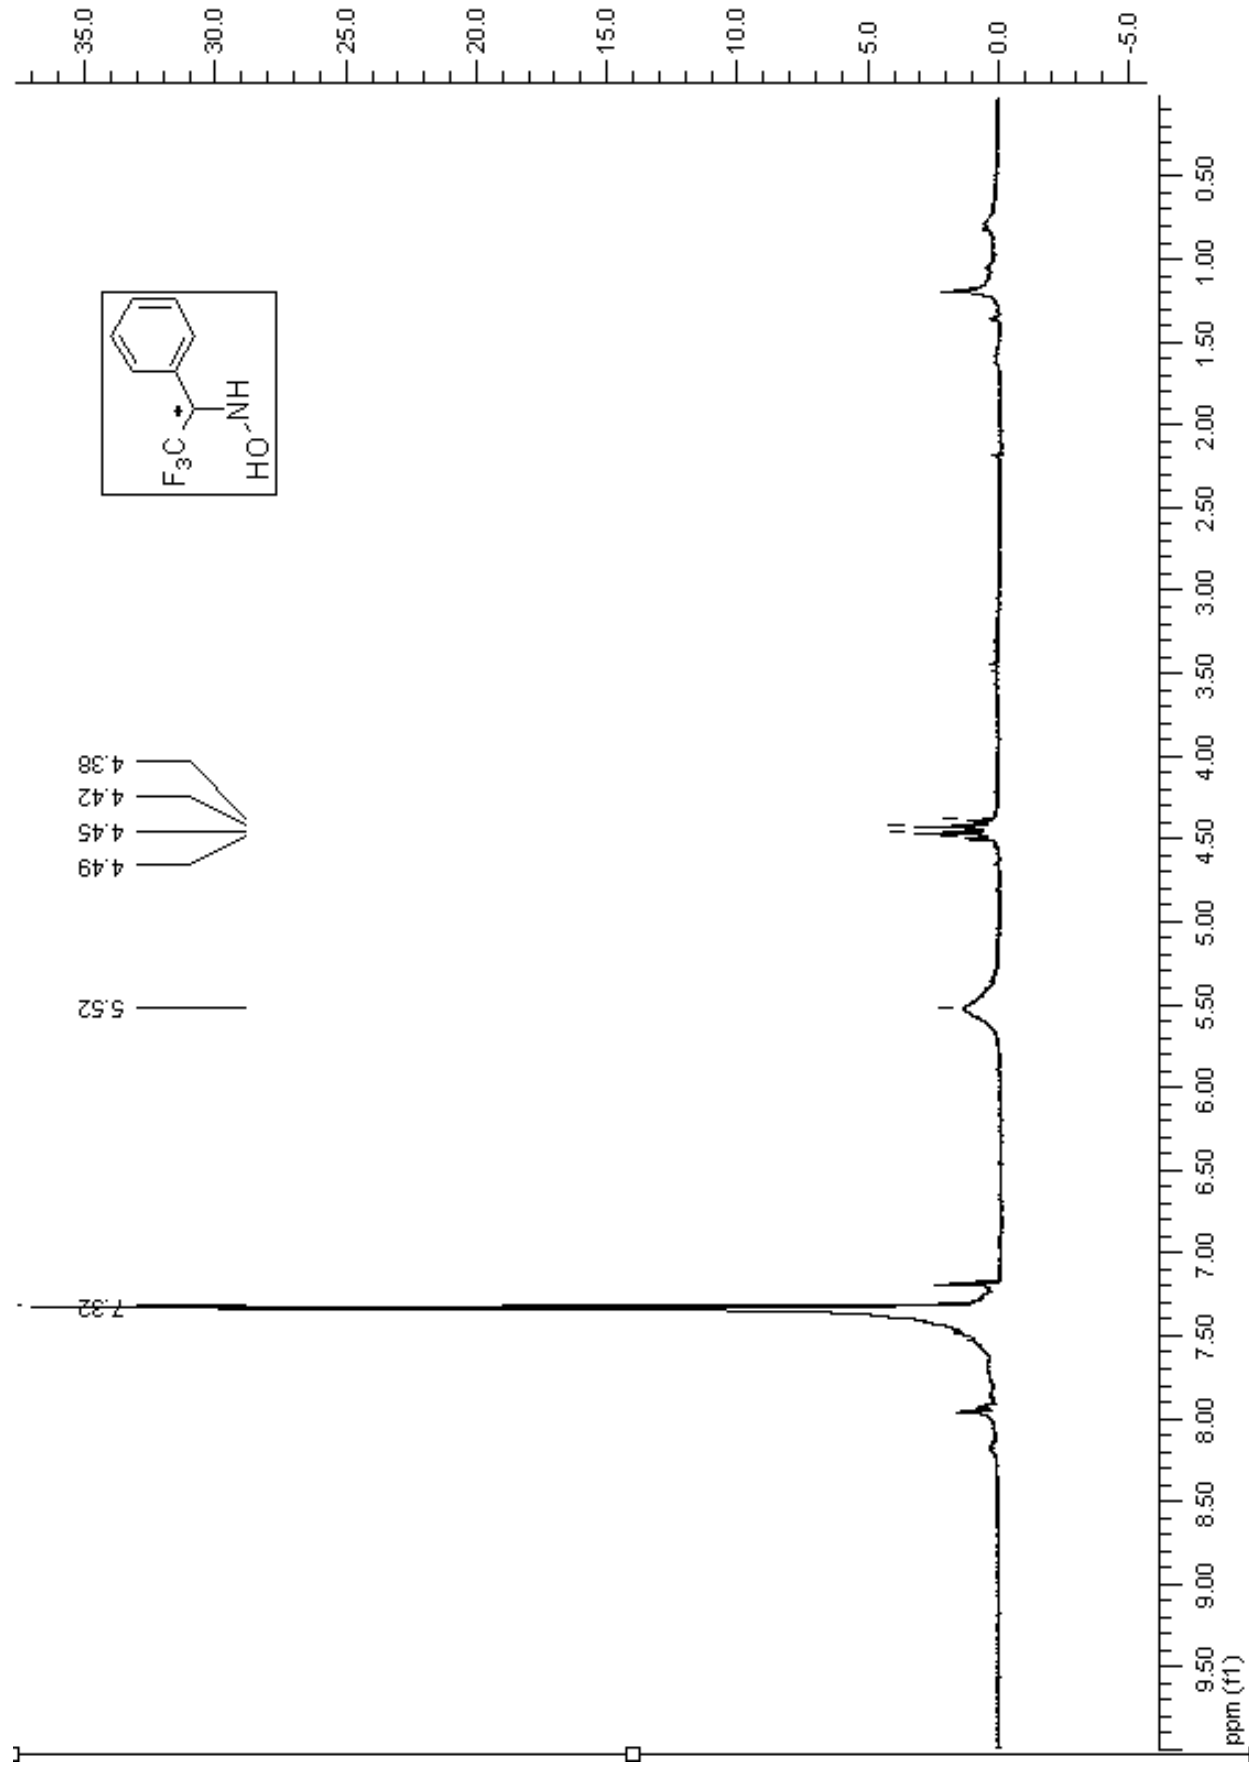

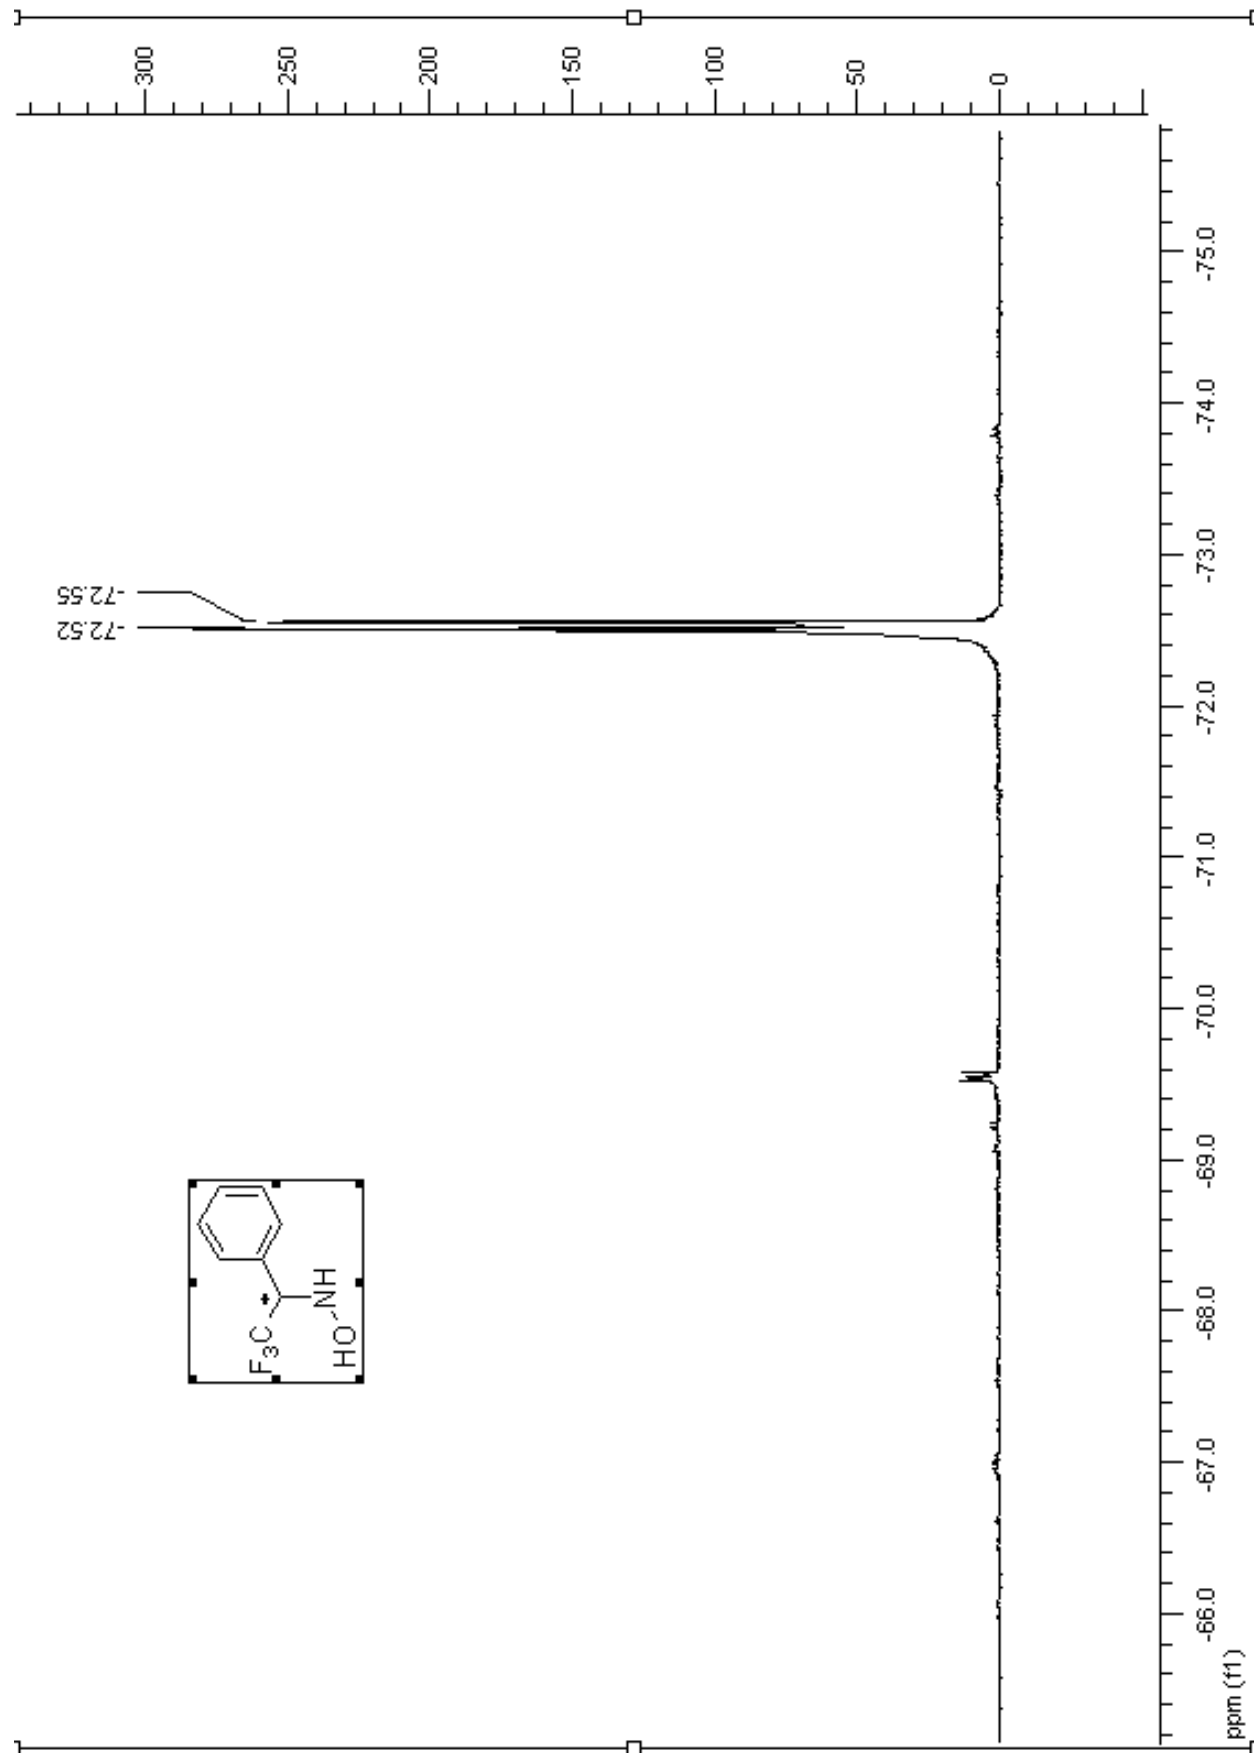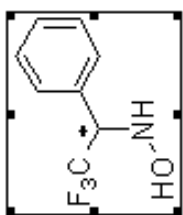



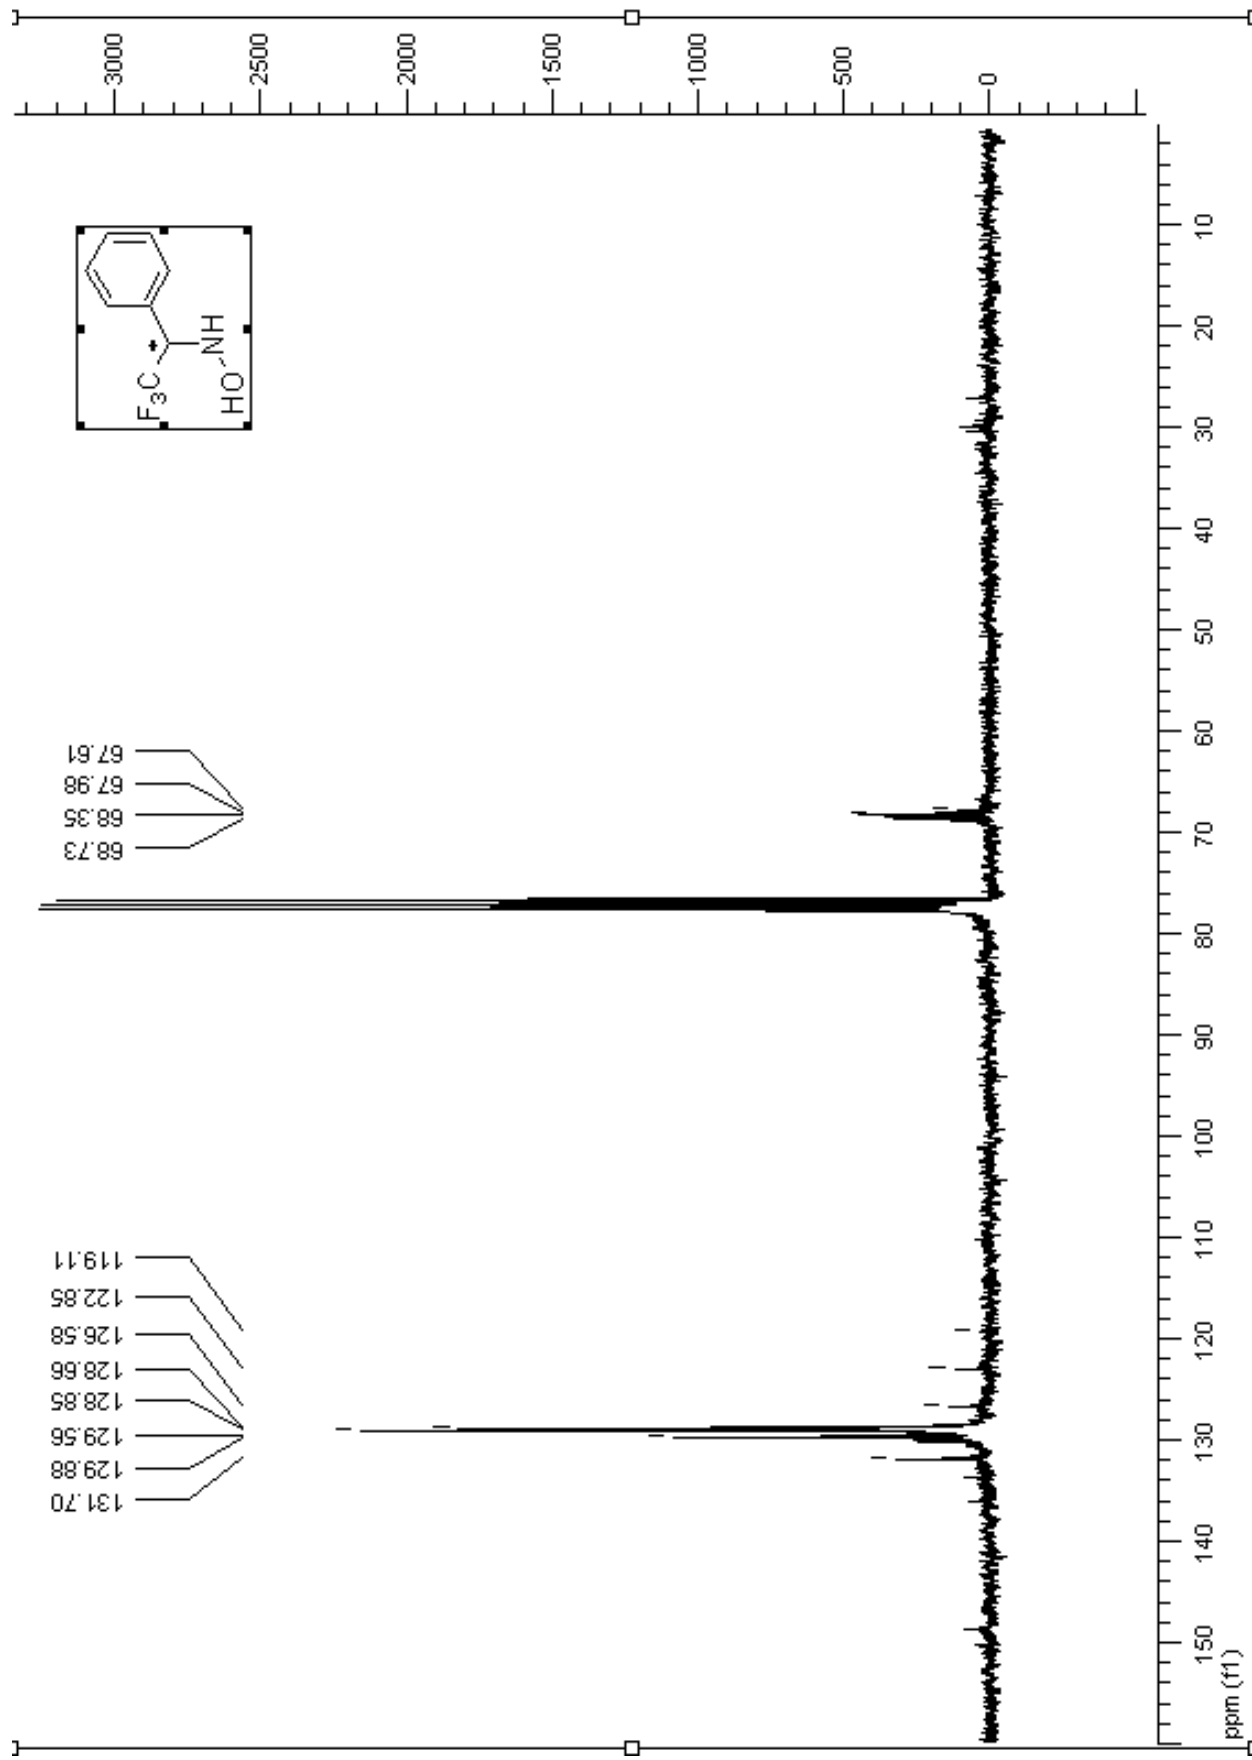

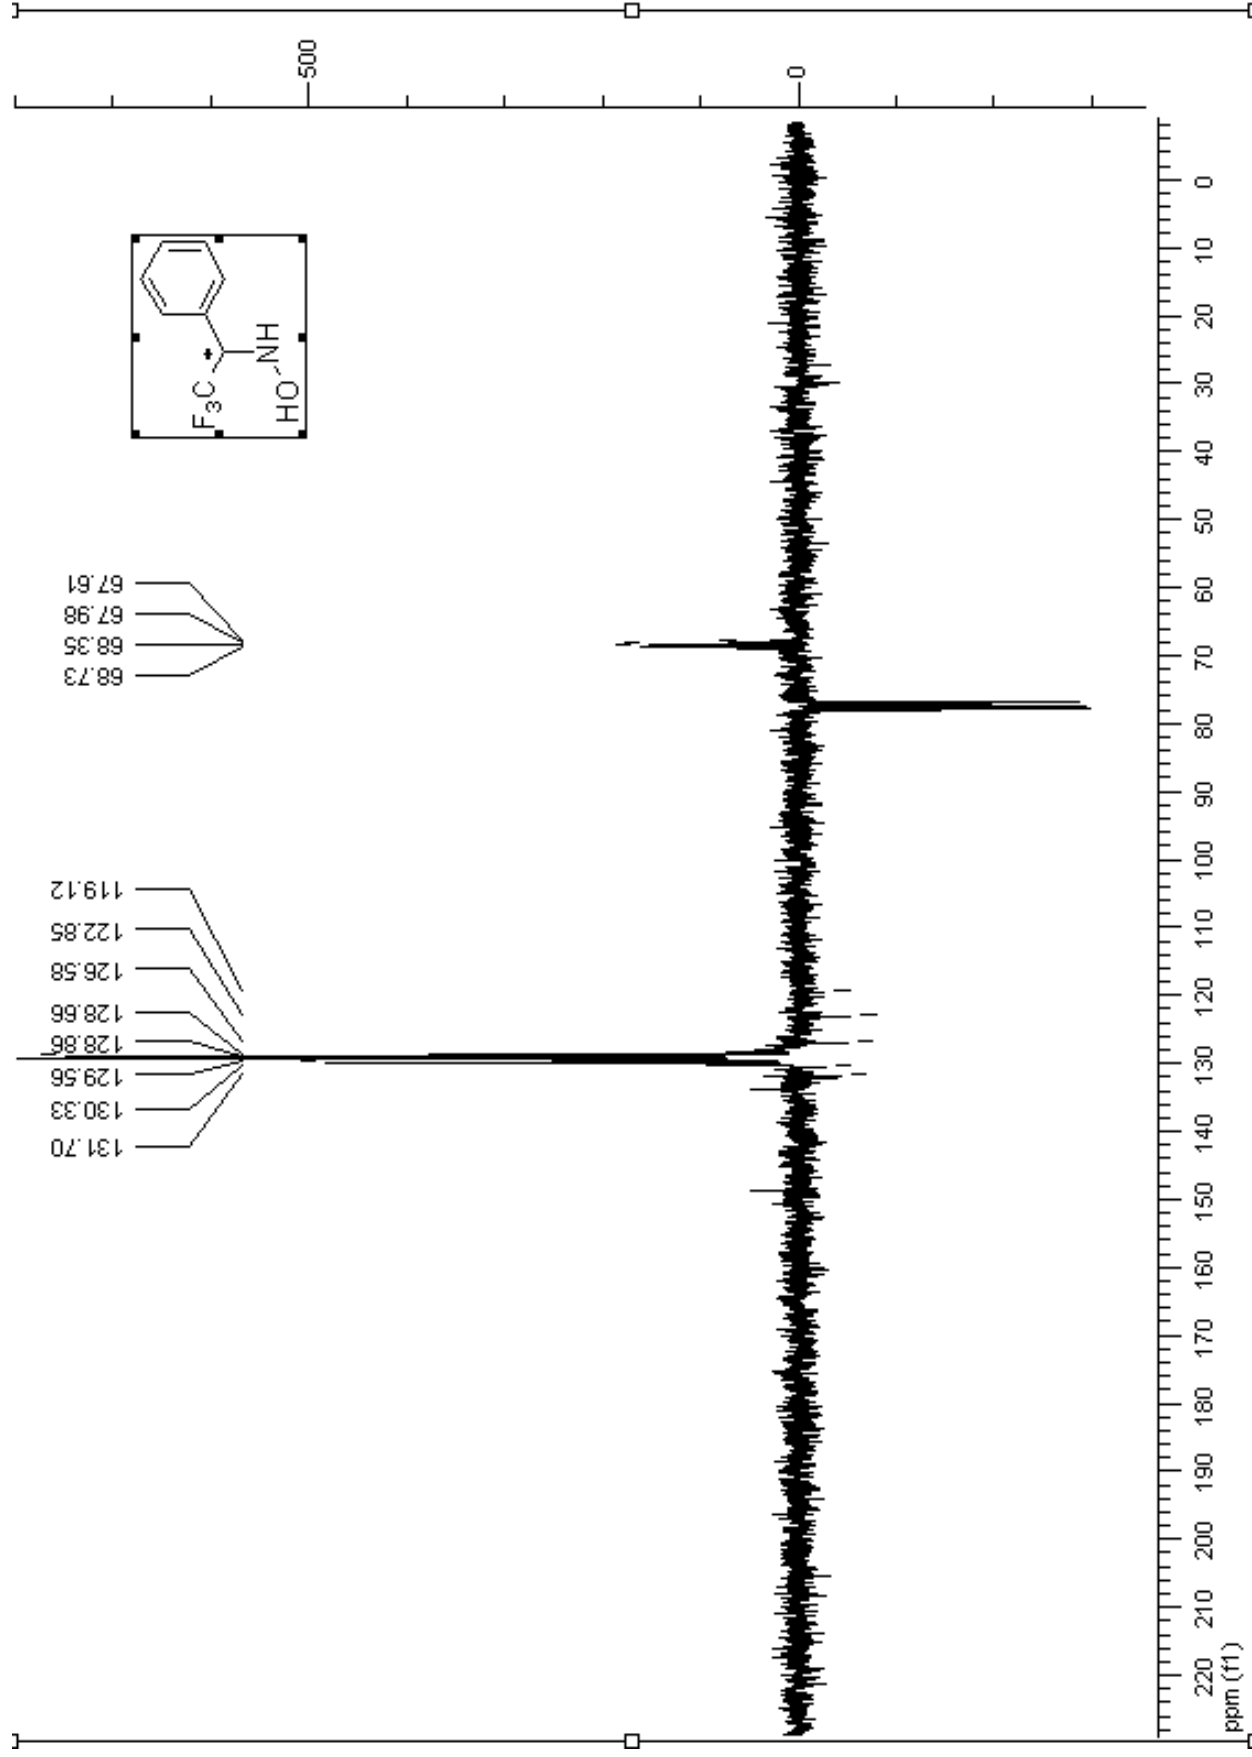

$^{19}\text{F}$  NMR of the racemic hydroxylamine **8** in the presence of  $\text{Eu}(\text{hfc})_3$ , showing two doublets:

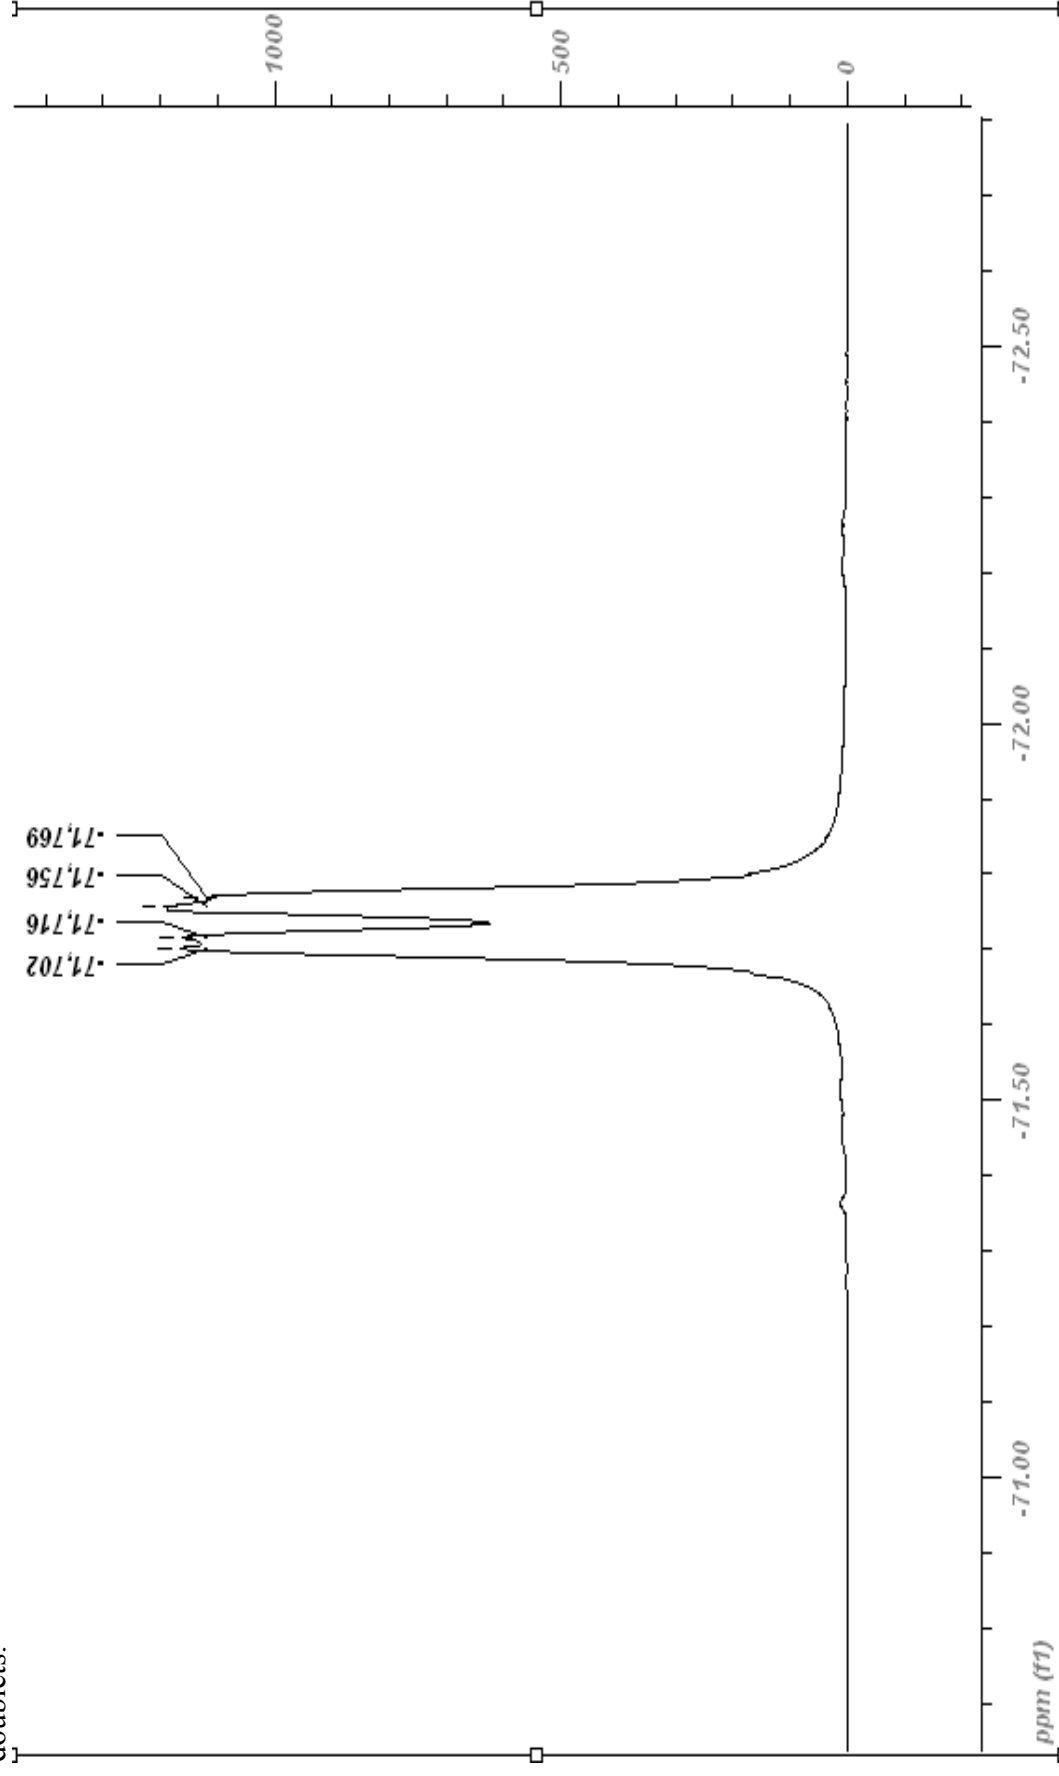

$^{19}\text{F}$  NMR of the enantiopure hydroxylamine **8** in the presence of  $\text{Eu}(\text{hfc})_3$ , showing only one doublet:

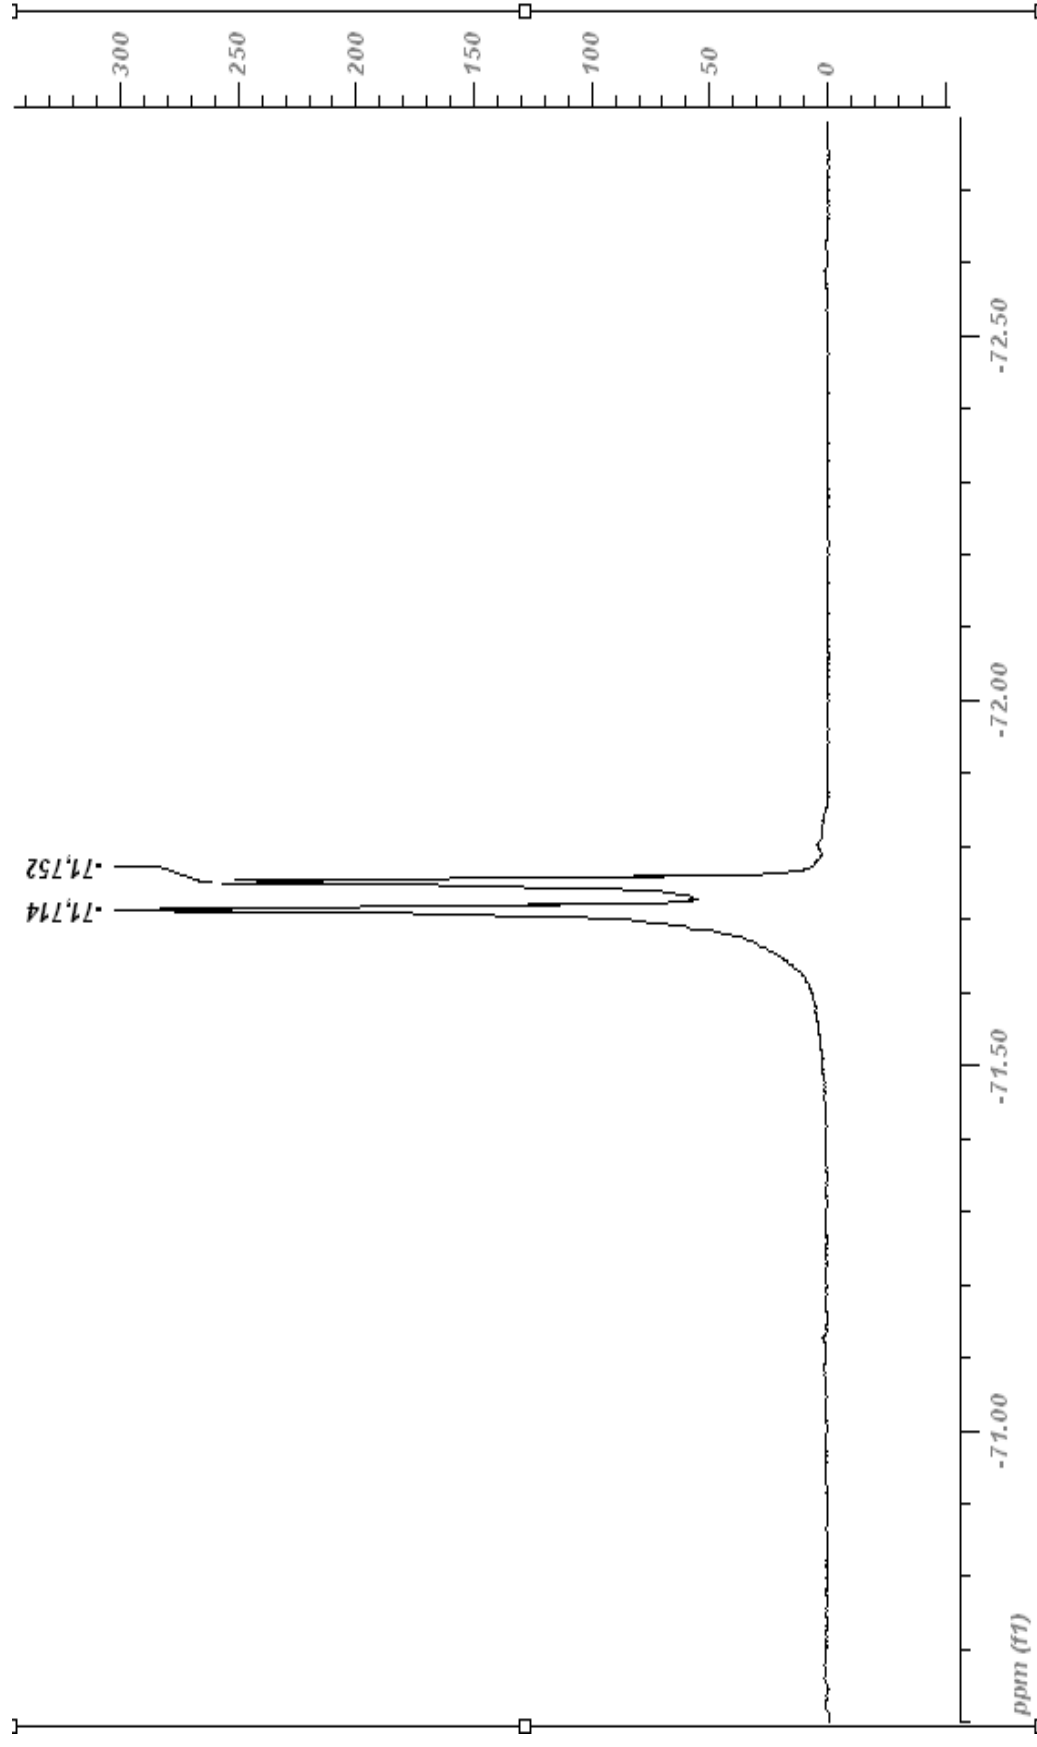

X-ray analysis of nitrone **2d**:

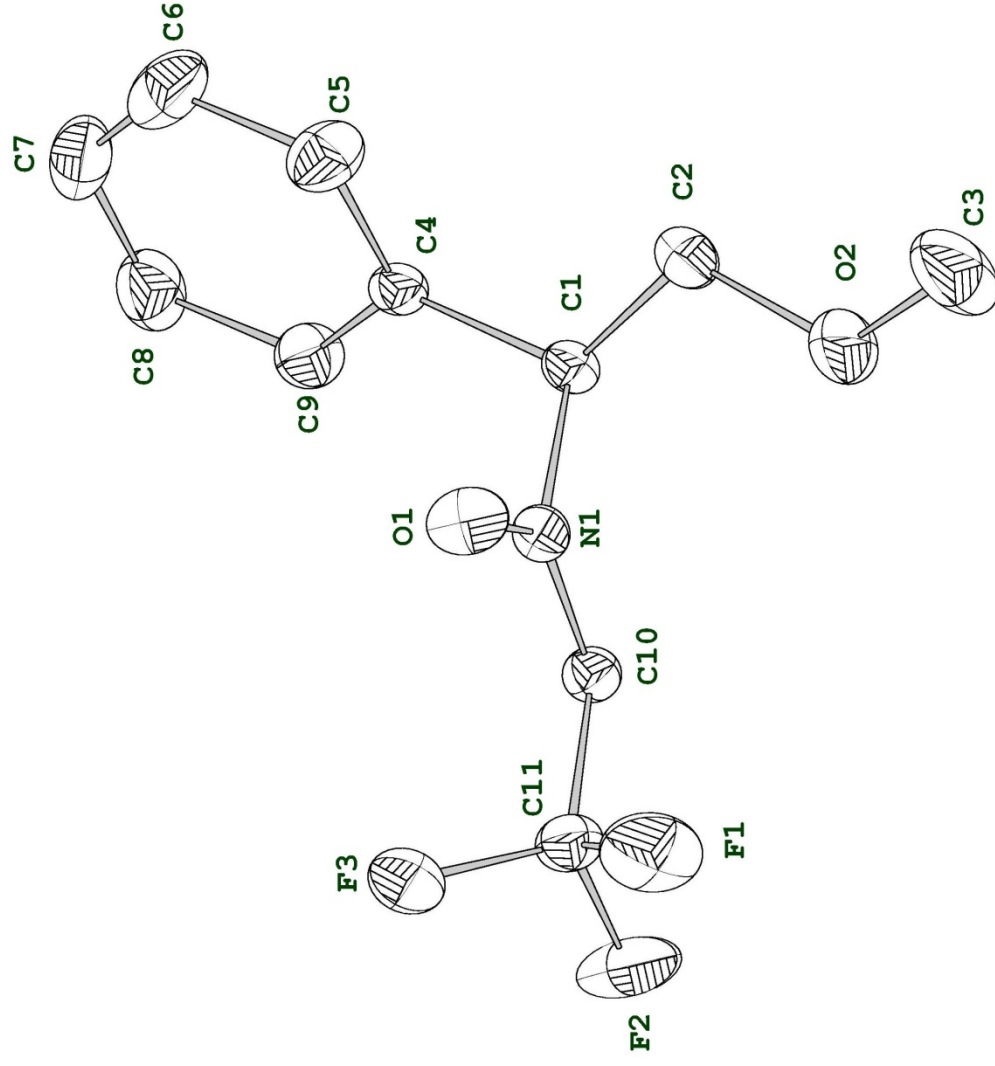

Supplement: c001791d.pdf [file c001791d.pdf]
